# Supplementary material for: Acute effects of air pollution on all-cause mortality: a natural experiment from haze control measures in Chiang Mai Province, Thailand
Source: PeerJ. 2020 May 27;8:e9207. doi: 10.7717/peerj.9207 (PMC7261137; doi:10.7717/peerj.9207)
Supplement: File S1 [file peerj-08-9207-s001.xlsx]

## Sheet: data_PeerJ
date	na.all	pm10.avg	so2.avg	no2.avg	o3.avg	co.avg	temp.avg	hum.avg	rain.avg	month	year	dow	season	Mon	Tue	Wed	Thu	Fri	Sat	rainy	summer
2002-01-01	44	40	2	11	53.5	0.5	21.8	74	0	1	2002	Tuesday	Winter	0	1	0	0	0	0	0	0
2002-01-02	40	57.5	4	16	39	1.5	21.6	72	0	1	2002	Wednesday	Winter	0	0	1	0	0	0	0	0
2002-01-03	38	49.5	5	12	25.5	1	20.8	73	0	1	2002	Thursday	Winter	0	0	0	1	0	0	0	0
2002-01-04	42	80	4.5	16	43.5	1	18.6	72	0	1	2002	Friday	Winter	0	0	0	0	1	0	0	0
2002-01-05	41	78	4.5	17.5	52.5	1	19.1	73	0	1	2002	Saturday	Winter	0	0	0	0	0	1	0	0
2002-01-06	27	82.5	4.5	17.5	58	1	19.5	74	0	1	2002	Sunday	Winter	0	0	0	0	0	0	0	0
2002-01-07	33	67	4.5	16	39	1	19.7	72	0	1	2002	Monday	Winter	1	0	0	0	0	0	0	0
2002-01-08	27	71.5	5.5	16	43	1	20.4	71	0	1	2002	Tuesday	Winter	0	1	0	0	0	0	0	0
2002-01-09	52	70.5	6	19.5	62	1	20.9	69	0	1	2002	Wednesday	Winter	0	0	1	0	0	0	0	0
2002-01-10	36	81	6	19	57.5	1.5	20.7	72	0	1	2002	Thursday	Winter	0	0	0	1	0	0	0	0
2002-01-11	42	77	8.5	20	75	2	21.5	72	0	1	2002	Friday	Winter	0	0	0	0	1	0	0	0
2002-01-12	33	64.5	7	17	56	1.5	21.8	73	0.05	1	2002	Saturday	Winter	0	0	0	0	0	1	0	0
2002-01-13	39	46.5	5	10	45.5	1	21.4	73	10.55	1	2002	Sunday	Winter	0	0	0	0	0	0	0	0
2002-01-14	33	47.5	4	14	48	1	21	76	0	1	2002	Monday	Winter	1	0	0	0	0	0	0	0
2002-01-15	32	42.5	3.5	14	54.5	1	20.9	75	0	1	2002	Tuesday	Winter	0	1	0	0	0	0	0	0
2002-01-16	48	48	3.5	15	41	1	20.4	70	0	1	2002	Wednesday	Winter	0	0	1	0	0	0	0	0
2002-01-17	41	44.5	3.5	16.5	40	1	20.7	68	0	1	2002	Thursday	Winter	0	0	0	1	0	0	0	0
2002-01-18	37	73	3	23	69	1.5	20.2	68	0	1	2002	Friday	Winter	0	0	0	0	1	0	0	0
2002-01-19	34	79	3	18.5	46.5	1	20.8	66	0	1	2002	Saturday	Winter	0	0	0	0	0	1	0	0
2002-01-20	58	88	3.5	19.5	79	1	20.5	68	0	1	2002	Sunday	Winter	0	0	0	0	0	0	0	0
2002-01-21	41	106.5	3.5	20.5	73.5	2	22.1	72	0	1	2002	Monday	Winter	1	0	0	0	0	0	0	0
2002-01-22	33	116.5	2	18	52.5	2	22.7	75	0	1	2002	Tuesday	Winter	0	1	0	0	0	0	0	0
2002-01-23	36	115	1	17.5	52	2	24.3	74	0	1	2002	Wednesday	Winter	0	0	1	0	0	0	0	0
2002-01-24	43	91	2	15.5	43.5	1.5	24.4	70	0	1	2002	Thursday	Winter	0	0	0	1	0	0	0	0
2002-01-25	39	75	3.5	16.5	44	1.5	24.5	63	0	1	2002	Friday	Winter	0	0	0	0	1	0	0	0
2002-01-26	35	61	3	15	41.5	1	23.8	67	0	1	2002	Saturday	Winter	0	0	0	0	0	1	0	0
2002-01-27	38	75	3	15.5	39	1	23.3	64	0	1	2002	Sunday	Winter	0	0	0	0	0	0	0	0
2002-01-28	29	80	3	18.5	72	1	21.4	64	0	1	2002	Monday	Winter	1	0	0	0	0	0	0	0
2002-01-29	38	98	3.5	15	44	1.5	22	71	0	1	2002	Tuesday	Winter	0	1	0	0	0	0	0	0
2002-01-30	39	111	3.5	16.5	40	1.5	23.4	77	0.35	1	2002	Wednesday	Winter	0	0	1	0	0	0	0	0
2002-01-31	35	113.5	3.5	16.5	47.5	1.5	23.1	73	0	1	2002	Thursday	Winter	0	0	0	1	0	0	0	0
2002-02-01	35	93.5	4.5	17.5	54.5	1	23.3	70	0	2	2002	Friday	Winter	0	0	0	0	1	0	0	0
2002-02-02	36	81.5	3.5	16.5	46.5	1	23.4	64	0	2	2002	Saturday	Winter	0	0	0	0	0	1	0	0
2002-02-03	45	86	5	13	43	1	22.8	64	0	2	2002	Sunday	Winter	0	0	0	0	0	0	0	0
2002-02-04	43	99.5	3.5	16	59	1	23.3	57	0	2	2002	Monday	Winter	1	0	0	0	0	0	0	0
2002-02-05	40	86	3.5	16	43	1	21.7	60	0	2	2002	Tuesday	Winter	0	1	0	0	0	0	0	0
2002-02-06	38	114	6	27	48	1	22.3	59	0	2	2002	Wednesday	Winter	0	0	1	0	0	0	0	0
2002-02-07	34	115	6	28	54	1	21.9	59	0	2	2002	Thursday	Winter	0	0	0	1	0	0	0	0
2002-02-08	39	115	5	31	75	1	21.7	59	0	2	2002	Friday	Winter	0	0	0	0	1	0	0	0
2002-02-09	40	89.5	5	26	51	0.5	23	60	0	2	2002	Saturday	Winter	0	0	0	0	0	1	0	0
2002-02-10	42	117	5	26	40	1	23.9	57	0	2	2002	Sunday	Winter	0	0	0	0	0	0	0	0
2002-02-11	52	170	6	29	55	1	23.9	63	0	2	2002	Monday	Winter	1	0	0	0	0	0	0	0
2002-02-12	35	167	6	18.5	77.5	1.5	25.3	70	0	2	2002	Tuesday	Winter	0	1	0	0	0	0	0	0
2002-02-13	39	135.5	4.5	17.5	60	1	26.1	62	0	2	2002	Wednesday	Winter	0	0	1	0	0	0	0	0
2002-02-14	32	137	3.5	10	85.5	1	26.4	64	0	2	2002	Thursday	Winter	0	0	0	1	0	0	0	0
2002-02-15	38	146	3	8	73.5	1.5	24.1	77	12.85	2	2002	Friday	Summer	0	0	0	0	1	0	0	1
2002-02-16	24	123.5	2	4	57	1	24.7	76	0	2	2002	Saturday	Summer	0	0	0	0	0	1	0	1
2002-02-17	27	154	4	6	71.5	1	24.7	74	0	2	2002	Sunday	Summer	0	0	0	0	0	0	0	1
2002-02-18	42	153	2.5	8	67	1.5	25.1	70	0	2	2002	Monday	Summer	1	0	0	0	0	0	0	1
2002-02-19	40	160	3	5	75	1	25.6	67	0.8	2	2002	Tuesday	Summer	0	1	0	0	0	0	0	1
2002-02-20	30	166.5	4	6	51	1	25.2	70	0	2	2002	Wednesday	Summer	0	0	1	0	0	0	0	1
2002-02-21	37	169.5	4	6	56	1	24.4	68	0	2	2002	Thursday	Summer	0	0	0	1	0	0	0	1
2002-02-22	32	141	4		61.5	1	24.8	58	0	2	2002	Friday	Summer	0	0	0	0	1	0	0	1
2002-02-23	41	124.5	3.5		62.5	1	23.7	52	0	2	2002	Saturday	Summer	0	0	0	0	0	1	0	1
2002-02-24	36	88	3		58.5	1	23.4	53	0	2	2002	Sunday	Summer	0	0	0	0	0	0	0	1
2002-02-25	45	92	2		118	2	24.1	51	0	2	2002	Monday	Summer	1	0	0	0	0	0	0	1
2002-02-26	34	82	2		116	1	23.9	53	0	2	2002	Tuesday	Summer	0	1	0	0	0	0	0	1
2002-02-27	31	75	3.5	19	103	1	23.4	54	0	2	2002	Wednesday	Summer	0	0	1	0	0	0	0	1
2002-02-28	38	63	4.5	34	67	1.5	24.8	54	0	2	2002	Thursday	Summer	0	0	0	1	0	0	0	1
2002-03-01	38	78.5	2	19.5	73	1	23.5	60	0	3	2002	Friday	Summer	0	0	0	0	1	0	0	1
2002-03-02	31	78	2	20	82.5	1	25.1	50	0	3	2002	Saturday	Summer	0	0	0	0	0	1	0	1
2002-03-03	36	85.5	2.5	21.5	65.5	1.5	24.3	52	0	3	2002	Sunday	Summer	0	0	0	0	0	0	0	1
2002-03-04	49	102	2.5	26	91.5	1.5	24.4	50	0	3	2002	Monday	Summer	1	0	0	0	0	0	0	1
2002-03-05	39	97	2.5	24.5	64	1.5	24.5	49	0	3	2002	Tuesday	Summer	0	1	0	0	0	0	0	1
2002-03-06	50	97	2	18.5	67	1.5	26.6	48	0	3	2002	Wednesday	Summer	0	0	1	0	0	0	0	1
2002-03-07	32	62	1	7	54	1	27.2	59	0.65	3	2002	Thursday	Summer	0	0	0	1	0	0	0	1
2002-03-08	37	64	1.5	7.5	55.5	1	25.3	60	0	3	2002	Friday	Summer	0	0	0	0	1	0	0	1
2002-03-09	37	69.5	2	12	64.5	1.5	24.9	59	0	3	2002	Saturday	Summer	0	0	0	0	0	1	0	1
2002-03-10	27	76.5	4	16.5	62	1.5	25.2	58	0	3	2002	Sunday	Summer	0	0	0	0	0	0	0	1
2002-03-11	42	83	3	20	73	1.5	26.1	54	0	3	2002	Monday	Summer	1	0	0	0	0	0	0	1
2002-03-12	49	81.5	2	19	67.5	1	27.3	55	0	3	2002	Tuesday	Summer	0	1	0	0	0	0	0	1
2002-03-13	37	83	1.5	17.5	76.5	1	27.2	48	0	3	2002	Wednesday	Summer	0	0	1	0	0	0	0	1
2002-03-14	35	94.5	1.5	21	74.5	2	27.1	45	0	3	2002	Thursday	Summer	0	0	0	1	0	0	0	1
2002-03-15	51	97	2	24.5	86	2	26.3	47	0	3	2002	Friday	Summer	0	0	0	0	1	0	0	1
2002-03-16	38	99	2.5	23	103	2	27.2	51	0	3	2002	Saturday	Summer	0	0	0	0	0	1	0	1
2002-03-17	40	95	2.5	21.5	86.5	2	27.2	51	0	3	2002	Sunday	Summer	0	0	0	0	0	0	0	1
2002-03-18	42	101	2	13	64	1	26.6	56	0	3	2002	Monday	Summer	1	0	0	0	0	0	0	1
2002-03-19	40	66	1.5	8.5	62	1	26.9	62	0	3	2002	Tuesday	Summer	0	1	0	0	0	0	0	1
2002-03-20	40	86.5	1	10.5	78.5		28.5	58	0	3	2002	Wednesday	Summer	0	0	1	0	0	0	0	1
2002-03-21	39	97.5	2	17	77		27.8	54	0	3	2002	Thursday	Summer	0	0	0	1	0	0	0	1
2002-03-22	37	91	2	15.5	74	1	28.9	47	0	3	2002	Friday	Summer	0	0	0	0	1	0	0	1
2002-03-23	25	74.5	2	18	23.5	1.5	24.8	69	0.55	3	2002	Saturday	Summer	0	0	0	0	0	1	0	1
2002-03-24	42	57.5	1	14	61.5	1.5	24.9	61	0.2	3	2002	Sunday	Summer	0	0	0	0	0	0	0	1
2002-03-25	35	79.5	2	18.5	79	1.5	26.4	51	0	3	2002	Monday	Summer	1	0	0	0	0	0	0	1
2002-03-26	40	111	3	22.5	89	2	26.4	45	0	3	2002	Tuesday	Summer	0	1	0	0	0	0	0	1
2002-03-27	34	122	3	27	84	2.5	26.9	46	0	3	2002	Wednesday	Summer	0	0	1	0	0	0	0	1
2002-03-28	45	102.5	3	26.5	71	2	27.6	52	0	3	2002	Thursday	Summer	0	0	0	1	0	0	0	1
2002-03-29	37	110	3	26	74.5	1.5	28.9	52	0	3	2002	Friday	Summer	0	0	0	0	1	0	0	1
2002-03-30	34	132	4	18	73.5	1.5	29	47	0	3	2002	Saturday	Summer	0	0	0	0	0	1	0	1
2002-03-31	25	96.5	3	12.5	73	1	28.9	49	0	3	2002	Sunday	Summer	0	0	0	0	0	0	0	1
2002-04-01	53	82.5	3	14.5	49.5	2	29.5	47	0	4	2002	Monday	Summer	1	0	0	0	0	0	0	1
2002-04-02	40	73.5	2	16	64	3.5	28.2	43	0	4	2002	Tuesday	Summer	0	1	0	0	0	0	0	1
2002-04-03	34	91.5	1	13.5	77.5	3	29	40	0	4	2002	Wednesday	Summer	0	0	1	0	0	0	0	1
2002-04-04	33	115.5	0	19	72	3	29	39	0	4	2002	Thursday	Summer	0	0	0	1	0	0	0	1
2002-04-05	39	114.5	1	22.5	90	2	28.6	40	0	4	2002	Friday	Summer	0	0	0	0	1	0	0	1
2002-04-06	51	197	3	19	98	2	28.2	44	0	4	2002	Saturday	Summer	0	0	0	0	0	1	0	1
2002-04-07	37	62	1		91	3	28.8	46	0	4	2002	Sunday	Summer	0	0	0	0	0	0	0	1
2002-04-08	39	43.5	0.5	15	83	1.5	29.3	42	0	4	2002	Monday	Summer	1	0	0	0	0	0	0	1
2002-04-09	35	40	0.5	10	67.5	1	29.6	38	0	4	2002	Tuesday	Summer	0	1	0	0	0	0	0	1
2002-04-10	37	49	1	12	73.5	1.5	28	45	0	4	2002	Wednesday	Summer	0	0	1	0	0	0	0	1
2002-04-11	44	76	1	8	81	1	30.3	47	0	4	2002	Thursday	Summer	0	0	0	1	0	0	0	1
2002-04-12	39	22.5	3	2	75	1	28.2	58	3.65	4	2002	Friday	Summer	0	0	0	0	1	0	0	1
2002-04-13	34	31	3		63	1	25.9	73	0	4	2002	Saturday	Summer	0	0	0	0	0	1	0	1
2002-04-14	41	18	3		73.5	1	27.4	58	0	4	2002	Sunday	Summer	0	0	0	0	0	0	0	1
2002-04-15	37	23	4		72.5	1	28.6	50	0	4	2002	Monday	Summer	1	0	0	0	0	0	0	1
2002-04-16	52	25	3	12	66	1	29.1	41	0	4	2002	Tuesday	Summer	0	1	0	0	0	0	0	1
2002-04-17	52	34	4	15	68	1	29.3	38	0	4	2002	Wednesday	Summer	0	0	1	0	0	0	0	1
2002-04-18	44	26.5	4	18	73	1.5	30.2	37	0	4	2002	Thursday	Summer	0	0	0	1	0	0	0	1
2002-04-19	42	31	2.5	6	67.5	1	31.3	44	0	4	2002	Friday	Summer	0	0	0	0	1	0	0	1
2002-04-20	55	30	2.5	9	69	1	31.9	44	0	4	2002	Saturday	Summer	0	0	0	0	0	1	0	1
2002-04-21	49	54.5	2	7	74	1	31.9	42	0	4	2002	Sunday	Summer	0	0	0	0	0	0	0	1
2002-04-22	44	30	2	6	63	1	30.3	53	7.5	4	2002	Monday	Summer	1	0	0	0	0	0	0	1
2002-04-23	43	34	1.5	9	72	1	29.9	52	0	4	2002	Tuesday	Summer	0	1	0	0	0	0	0	1
2002-04-24	37	39	1.5	8	56	0.5	30	52	0	4	2002	Wednesday	Summer	0	0	1	0	0	0	0	1
2002-04-25	40	29	1.5	7	69	1	28.6	56	1	4	2002	Thursday	Summer	0	0	0	1	0	0	0	1
2002-04-26	44	26	1.5	15	62	0.5	29.5	58	0	4	2002	Friday	Summer	0	0	0	0	1	0	0	1
2002-04-27	44	31	1.5		56	0	29.4	58	0.35	4	2002	Saturday	Summer	0	0	0	0	0	1	0	1
2002-04-28	41	37.5	1	2.5	61.5	0	28	66	0.65	4	2002	Sunday	Summer	0	0	0	0	0	0	0	1
2002-04-29	34	30.5	0	6	87	0.5	30.5	55	0	4	2002	Monday	Summer	1	0	0	0	0	0	0	1
2002-04-30	39	18	0	8	87	1	31.2	50	0	4	2002	Tuesday	Summer	0	1	0	0	0	0	0	1
2002-05-01	40	23	1	7	89	1	30.8	53	0	5	2002	Wednesday	Summer	0	0	1	0	0	0	0	1
2002-05-02	47	32.5	0.5	4	61.5	0.5	30.8	54	0	5	2002	Thursday	Summer	0	0	0	1	0	0	0	1
2002-05-03	34	30	0.5	11.5	68	0	30.6	56	0	5	2002	Friday	Summer	0	0	0	0	1	0	0	1
2002-05-04	35	23	2		66.5	0.5	28.6	63	7.05	5	2002	Saturday	Summer	0	0	0	0	0	1	0	1
2002-05-05	43	28.5	1	20	63.5	0.5	26.6	61	11.45	5	2002	Sunday	Summer	0	0	0	0	0	0	0	1
2002-05-06	31	27.5	1	12	63.5	0.5	27.4	70	0.4	5	2002	Monday	Summer	1	0	0	0	0	0	0	1
2002-05-07	43	52.5	2		64	0	29.8	61	0	5	2002	Tuesday	Summer	0	1	0	0	0	0	0	1
2002-05-08	45	50.5	2		52	0	31.2	52	0.7	5	2002	Wednesday	Summer	0	0	1	0	0	0	0	1
2002-05-09	47	40	2		53	0	31.7	51	0	5	2002	Thursday	Summer	0	0	0	1	0	0	0	1
2002-05-10	50	45.5	2		52	0	31	56	3.4	5	2002	Friday	Summer	0	0	0	0	1	0	0	1
2002-05-11	26	34	1.5	5	35	0	29.5	62	9.95	5	2002	Saturday	Summer	0	0	0	0	0	1	0	1
2002-05-12	30	23	0		17	1	24.4	92	34	5	2002	Sunday	Summer	0	0	0	0	0	0	0	1
2002-05-13	38	23	0.5	3	28.5	1	25.7	85	20	5	2002	Monday	Summer	1	0	0	0	0	0	0	1
2002-05-14	39	40	1.5	3	45.5	1	26.8	81	0	5	2002	Tuesday	Summer	0	1	0	0	0	0	0	1
2002-05-15	30	33	1.5	2	25.5	1	27	76	6.6	5	2002	Wednesday	Rainy	0	0	1	0	0	0	1	0
2002-05-16	25	28	1.5	3	23	1	25.8	87	37.7	5	2002	Thursday	Rainy	0	0	0	1	0	0	1	0
2002-05-17	30	15	1.5	3	23	1	25	89	28.85	5	2002	Friday	Rainy	0	0	0	0	1	0	1	0
2002-05-18	29	41.5	1	2	13	0.5	24.2	91	18.8	5	2002	Saturday	Rainy	0	0	0	0	0	1	1	0
2002-05-19	40	20	0.5	3	27.5	0.5	24.2	92	6.45	5	2002	Sunday	Rainy	0	0	0	0	0	0	1	0
2002-05-20	32	43.5	0.5	9	39.5	0.5	27.4	76	0	5	2002	Monday	Rainy	1	0	0	0	0	0	1	0
2002-05-21	50	53	0.5	9.5	43	0.5	28.5	72	1.55	5	2002	Tuesday	Rainy	0	1	0	0	0	0	1	0
2002-05-22	41	46	0.5	8.5	52	0.5	28.7	67	0	5	2002	Wednesday	Rainy	0	0	1	0	0	0	1	0
2002-05-23	28	49	0	9	60.5	0.5	27.2	76	3.95	5	2002	Thursday	Rainy	0	0	0	1	0	0	1	0
2002-05-24	43	44.5	0	9	52	0.5	27.8	74	5.3	5	2002	Friday	Rainy	0	0	0	0	1	0	1	0
2002-05-25	44	35.5	0	7	70	0.5	28.1	72	4.7	5	2002	Saturday	Rainy	0	0	0	0	0	1	1	0
2002-05-26	34	33	0.5	5	59	0	25.9	83	6.4	5	2002	Sunday	Rainy	0	0	0	0	0	0	1	0
2002-05-27	37	29	0.5	6	48.5	0	27.3	78	0	5	2002	Monday	Rainy	1	0	0	0	0	0	1	0
2002-05-28	24	29.5	0.5	7	36.5	0.5	27.2	76	5.15	5	2002	Tuesday	Rainy	0	1	0	0	0	0	1	0
2002-05-29	40	30.5	0.5	11.5	33	0.5	26.5	86	24.1	5	2002	Wednesday	Rainy	0	0	1	0	0	0	1	0
2002-05-30	32	47	0.5	9.5	27.5	0.5	27.2	81	0	5	2002	Thursday	Rainy	0	0	0	1	0	0	1	0
2002-05-31	35	46.5	3.5	7	36.5	0.5	29	69	0	5	2002	Friday	Rainy	0	0	0	0	1	0	1	0
2002-06-01	47	30.5	1	6	37	0.5	28.6	69	2.35	6	2002	Saturday	Rainy	0	0	0	0	0	1	1	0
2002-06-02	41	26.5	0	4.5	32.5	0	28.6	70	0	6	2002	Sunday	Rainy	0	0	0	0	0	0	1	0
2002-06-03	44	30	0.5	6	39	0.5	27	78	0	6	2002	Monday	Rainy	1	0	0	0	0	0	1	0
2002-06-04	34	34	1	4	27	0	27.7	78	18.8	6	2002	Tuesday	Rainy	0	1	0	0	0	0	1	0
2002-06-05	44	30	1	5.5	41	0.5	27.1	82	0.05	6	2002	Wednesday	Rainy	0	0	1	0	0	0	1	0
2002-06-06	30	35	1	4	30.5	0	27.2	82	16.15	6	2002	Thursday	Rainy	0	0	0	1	0	0	1	0
2002-06-07	40	36.5	0.5		32	0.5	25.5	91	10.25	6	2002	Friday	Rainy	0	0	0	0	1	0	1	0
2002-06-08	40	35.5	0.5	9	33	0.5	26.6	86	17.9	6	2002	Saturday	Rainy	0	0	0	0	0	1	1	0
2002-06-09	31	24.5	0	6	23	0.5	26.6	86	0	6	2002	Sunday	Rainy	0	0	0	0	0	0	1	0
2002-06-10	44	32	0	9	24.5	0.5	26.3	84	9.25	6	2002	Monday	Rainy	1	0	0	0	0	0	1	0
2002-06-11	31	41.5	0	13	27.5	0.5	26.7	83	0	6	2002	Tuesday	Rainy	0	1	0	0	0	0	1	0
2002-06-12	42	38	0	11	25	0.5	26.6	82	5.1	6	2002	Wednesday	Rainy	0	0	1	0	0	0	1	0
2002-06-13	36	33.5	0	8	22.5	0.5	27.7	79	0	6	2002	Thursday	Rainy	0	0	0	1	0	0	1	0
2002-06-14	31	17	3	7	35	0	27.6	76	0	6	2002	Friday	Rainy	0	0	0	0	1	0	1	0
2002-06-15	32	16	2	5	26.5	0	27.4	79	0	6	2002	Saturday	Rainy	0	0	0	0	0	1	1	0
2002-06-16	31	20	1	5.5	27	0	28	76	0	6	2002	Sunday	Rainy	0	0	0	0	0	0	1	0
2002-06-17	52	20	1	6.5	24	0.5	27.7	79	1.35	6	2002	Monday	Rainy	1	0	0	0	0	0	1	0
2002-06-18	36	29.5	1	8	34.5	1	27.7	80	0	6	2002	Tuesday	Rainy	0	1	0	0	0	0	1	0
2002-06-19	30	28	0.5	11	23	1	26.6	82	15.2	6	2002	Wednesday	Rainy	0	0	1	0	0	0	1	0
2002-06-20	37	25.5	0	4.5	24	0	26.5	81	0	6	2002	Thursday	Rainy	0	0	0	1	0	0	1	0
2002-06-21	50	25.5	0	5.5	20	0	27.4	77	0	6	2002	Friday	Rainy	0	0	0	0	1	0	1	0
2002-06-22	35	24.5	0	5.5	24	0	27.7	75	0.05	6	2002	Saturday	Rainy	0	0	0	0	0	1	1	0
2002-06-23	23	22.5	0	5	20.5	0	27	79	0	6	2002	Sunday	Rainy	0	0	0	0	0	0	1	0
2002-06-24	36	23.5	0	6	18.5	0.5	27.6	75	0	6	2002	Monday	Rainy	1	0	0	0	0	0	1	0
2002-06-25	37	32	0.5	8	34	0.5	26.9	79	0.85	6	2002	Tuesday	Rainy	0	1	0	0	0	0	1	0
2002-06-26	43	26	0.5	8	27.5	0.5	27.3	79	0.7	6	2002	Wednesday	Rainy	0	0	1	0	0	0	1	0
2002-06-27	34	30.5	0.5	10	33.5	0.5	26.7	86	2.1	6	2002	Thursday	Rainy	0	0	0	1	0	0	1	0
2002-06-28	42	28.5	0.5	8.5	22	0.5	26	88	2.35	6	2002	Friday	Rainy	0	0	0	0	1	0	1	0
2002-06-29	37	21	0.5	7	19	0	27.3	83	13.45	6	2002	Saturday	Rainy	0	0	0	0	0	1	1	0
2002-06-30	29	21	1	9.5	27	0.5	27.4	86	2.5	6	2002	Sunday	Rainy	0	0	0	0	0	0	1	0
2002-07-01	39	30	0.5	9	22	1	26.8	85	1.9	7	2002	Monday	Rainy	1	0	0	0	0	0	1	0
2002-07-02	46	32	0	7.5	28	1	27.5	81	0	7	2002	Tuesday	Rainy	0	1	0	0	0	0	1	0
2002-07-03	42	35.5	0.5	12.5	20.5	1	26.6	85	3.25	7	2002	Wednesday	Rainy	0	0	1	0	0	0	1	0
2002-07-04	44	37	0.5	10	35	1	27.4	82	1.65	7	2002	Thursday	Rainy	0	0	0	1	0	0	1	0
2002-07-05	39	33.5	0.5	8.5	36	1	28.7	76	0	7	2002	Friday	Rainy	0	0	0	0	1	0	1	0
2002-07-06	46	30.5	0.5	8	31	1	26.2	84	13.75	7	2002	Saturday	Rainy	0	0	0	0	0	1	1	0
2002-07-07	38	26.5	1	10	19.5	1	25.1	91	15.55	7	2002	Sunday	Rainy	0	0	0	0	0	0	1	0
2002-07-08	33	29.5	0.5	9	28	0.5	26.5	85	0.55	7	2002	Monday	Rainy	1	0	0	0	0	0	1	0
2002-07-09	34	29.5	0.5	10	28	0.5	27.3	82	0	7	2002	Tuesday	Rainy	0	1	0	0	0	0	1	0
2002-07-10	40	23	0.5	7.5	20.5	0	25.9	88	0.7	7	2002	Wednesday	Rainy	0	0	1	0	0	0	1	0
2002-07-11	38	34.5	1.5	10	30.5	0	27.1	83	1.65	7	2002	Thursday	Rainy	0	0	0	1	0	0	1	0
2002-07-12	41	23	1	6	23.5	0	27.5	76	1.1	7	2002	Friday	Rainy	0	0	0	0	1	0	1	0
2002-07-13	37	30	1	8	20	0	27.4	77	0.35	7	2002	Saturday	Rainy	0	0	0	0	0	1	1	0
2002-07-14	43	29	2	4	28	1	27.4	78	0	7	2002	Sunday	Rainy	0	0	0	0	0	0	1	0
2002-07-15	46	34	2	6.5	24	0.5	26.9	80	0.2	7	2002	Monday	Rainy	1	0	0	0	0	0	1	0
2002-07-16	40	30	2	5.5	28	1	27.1	79	4.8	7	2002	Tuesday	Rainy	0	1	0	0	0	0	1	0
2002-07-17	39	29	2	6.5	24.5	0.5	26.7	82	0	7	2002	Wednesday	Rainy	0	0	1	0	0	0	1	0
2002-07-18	46	37	1	8.5	41	0.5	27.6	77	2.2	7	2002	Thursday	Rainy	0	0	0	1	0	0	1	0
2002-07-19	49	32	1	7	38	1	27.2	81	2.75	7	2002	Friday	Rainy	0	0	0	0	1	0	1	0
2002-07-20	29	33	1	8	22	1	24.2	95	8.15	7	2002	Saturday	Rainy	0	0	0	0	0	1	1	0
2002-07-21	40	25	1	8	12.5	1	23.5	94	8	7	2002	Sunday	Rainy	0	0	0	0	0	0	1	0
2002-07-22	39	42	0.5	8.5	19	1	24.9	87	0	7	2002	Monday	Rainy	1	0	0	0	0	0	1	0
2002-07-23	42	50	1	7	26.5	0.5	26.9	79	0.15	7	2002	Tuesday	Rainy	0	1	0	0	0	0	1	0
2002-07-24	44	44	0.5	5	32.5	0.5	27.9	73	0	7	2002	Wednesday	Rainy	0	0	1	0	0	0	1	0
2002-07-25	40	35	0.5	4	22	0	27.2	76	0	7	2002	Thursday	Rainy	0	0	0	1	0	0	1	0
2002-07-26	40	24	0	3	23.5	0	26.9	79	0.95	7	2002	Friday	Rainy	0	0	0	0	1	0	1	0
2002-07-27	37	41.5	1	5	31.5	1	26.1	82	15.35	7	2002	Saturday	Rainy	0	0	0	0	0	1	1	0
2002-07-28	59	34	1.5	7	41	1	26.4	85	5.3	7	2002	Sunday	Rainy	0	0	0	0	0	0	1	0
2002-07-29	54	31	1	7	23.5	1	27.1	79	3.15	7	2002	Monday	Rainy	1	0	0	0	0	0	1	0
2002-07-30	58	56	1	7.5	40.5	1	27.4	77	0.35	7	2002	Tuesday	Rainy	0	1	0	0	0	0	1	0
2002-07-31	43	52.5	1.5	9.5	35	1	28	73	0	7	2002	Wednesday	Rainy	0	0	1	0	0	0	1	0
2002-08-01	53	35	1.5	7.5	34	0.5	26.9	79	6.85	8	2002	Thursday	Rainy	0	0	0	1	0	0	1	0
2002-08-02	33	28	1.5	8.5	30.5	0.5	25.6	90	2.15	8	2002	Friday	Rainy	0	0	0	0	1	0	1	0
2002-08-03	51	27	2	6	21	0	26	84	6.8	8	2002	Saturday	Rainy	0	0	0	0	0	1	1	0
2002-08-04	42	26	2	6	29	0.5	25.9	88	7.4	8	2002	Sunday	Rainy	0	0	0	0	0	0	1	0
2002-08-05	54	27	2	6.5	21.5	0.5	26.5	86	5	8	2002	Monday	Rainy	1	0	0	0	0	0	1	0
2002-08-06	48	28	2	5.5	20	0.5	26.6	83	2	8	2002	Tuesday	Rainy	0	1	0	0	0	0	1	0
2002-08-07	44	26	2	5.5	26.5	0.5	26.9	78	0.1	8	2002	Wednesday	Rainy	0	0	1	0	0	0	1	0
2002-08-08	49	23	2	6	22.5	0.5	26.9	76	1.45	8	2002	Thursday	Rainy	0	0	0	1	0	0	1	0
2002-08-09	39	26	2.5	6.5	27.5	1	26.9	75	0	8	2002	Friday	Rainy	0	0	0	0	1	0	1	0
2002-08-10	36	21	2	5.5	22	1	26.5	78	11.45	8	2002	Saturday	Rainy	0	0	0	0	0	1	1	0
2002-08-11	39		1	5	18	0.5	26.1	85	2.9	8	2002	Sunday	Rainy	0	0	0	0	0	0	1	0
2002-08-12	34	43.5	1	3	17	0	27.1	80	2.5	8	2002	Monday	Rainy	1	0	0	0	0	0	1	0
2002-08-13	41	55	0	7	23.5	0	27.2	77	3.5	8	2002	Tuesday	Rainy	0	1	0	0	0	0	1	0
2002-08-14	32	50.5	0.5	6	19	0	26.8	75	0	8	2002	Wednesday	Rainy	0	0	1	0	0	0	1	0
2002-08-15	55	49	0.5	3.5	21.5	0	27.1	76	3.9	8	2002	Thursday	Rainy	0	0	0	1	0	0	1	0
2002-08-16	34	47	1	6	28	0	26.5	81	3	8	2002	Friday	Rainy	0	0	0	0	1	0	1	0
2002-08-17	29	42	1.5	8.5	21	0.5	26.1	82	0.9	8	2002	Saturday	Rainy	0	0	0	0	0	1	1	0
2002-08-18	37	62	1.5	4.5	35.5	0	27.1	82	19.35	8	2002	Sunday	Rainy	0	0	0	0	0	0	1	0
2002-08-19	37	40.5	1	3.5	25.5	0	25.9	86	13.85	8	2002	Monday	Rainy	1	0	0	0	0	0	1	0
2002-08-20	45	22	3	11	37	0	25.8	86	4.6	8	2002	Tuesday	Rainy	0	1	0	0	0	0	1	0
2002-08-21	40	26	1	14	29	0	25.1	85	2.6	8	2002	Wednesday	Rainy	0	0	1	0	0	0	1	0
2002-08-22	35		2		20	1	24.5	91	28.3	8	2002	Thursday	Rainy	0	0	0	1	0	0	1	0
2002-08-23	30	86	1	3.5	10	0.5	24.3	95	30.15	8	2002	Friday	Rainy	0	0	0	0	1	0	1	0
2002-08-24	34		2	9	22	1	25.5	89	14.65	8	2002	Saturday	Rainy	0	0	0	0	0	1	1	0
2002-08-25	41	49	1	7	17.5	0.5	24.8	89	0.8	8	2002	Sunday	Rainy	0	0	0	0	0	0	1	0
2002-08-26	49	41	1	7.5	20.5	0.5	26	83	2.6	8	2002	Monday	Rainy	1	0	0	0	0	0	1	0
2002-08-27	43	39.5	1	8	33	0	26.6	83	25.45	8	2002	Tuesday	Rainy	0	1	0	0	0	0	1	0
2002-08-28	31	31.5	1	7	31	0.5	26	86	8.15	8	2002	Wednesday	Rainy	0	0	1	0	0	0	1	0
2002-08-29	38	24	0.5	7.5	18	0	25.4	89	6.55	8	2002	Thursday	Rainy	0	0	0	1	0	0	1	0
2002-08-30	41	31	0.5	6.5	23.5	0	27.3	82	1.65	8	2002	Friday	Rainy	0	0	0	0	1	0	1	0
2002-08-31	46	41	0.5	8.5	28.5	0.5	27.6	79	0.25	8	2002	Saturday	Rainy	0	0	0	0	0	1	1	0
2002-09-01	34	43.5	0	6.5	37.5	0	26.2	84	20.9	9	2002	Sunday	Rainy	0	0	0	0	0	0	1	0
2002-09-02	32	45	1	6	12	0.5	26.3	86	21.05	9	2002	Monday	Rainy	1	0	0	0	0	0	1	0
2002-09-03	35	36	1	7.5	16	1	25.5	89	16.35	9	2002	Tuesday	Rainy	0	1	0	0	0	0	1	0
2002-09-04	37	32.5	2.5	6	11	1	24.7	91	23.05	9	2002	Wednesday	Rainy	0	0	1	0	0	0	1	0
2002-09-05	25	39.5	2.5	5.5	15	1	25.7	86	11.1	9	2002	Thursday	Rainy	0	0	0	1	0	0	1	0
2002-09-06	30	44	2.5	6	17.5	0.5	24.7	92	19.2	9	2002	Friday	Rainy	0	0	0	0	1	0	1	0
2002-09-07	43	26	2	5	21	0	25.4	88	10.25	9	2002	Saturday	Rainy	0	0	0	0	0	1	1	0
2002-09-08	46	29	0.5	6	22.5	0	25.5	89	0.55	9	2002	Sunday	Rainy	0	0	0	0	0	0	1	0
2002-09-09	44	33.5	1	6	25	0	25.7	87	3.05	9	2002	Monday	Rainy	1	0	0	0	0	0	1	0
2002-09-10	37	28.5	1	7	31.5	0	24.8	90	19.65	9	2002	Tuesday	Rainy	0	1	0	0	0	0	1	0
2002-09-11	53	46	1.5	7.5	36	0.5	26.9	81	0	9	2002	Wednesday	Rainy	0	0	1	0	0	0	1	0
2002-09-12	46	51	1.5	7	55	0.5	27.1	83	0	9	2002	Thursday	Rainy	0	0	0	1	0	0	1	0
2002-09-13	37		1.5	8.5	50.5	0	26.7	84	0	9	2002	Friday	Rainy	0	0	0	0	1	0	1	0
2002-09-14	35	25	1.5	8.5	35	0.5	26	87	4.6	9	2002	Saturday	Rainy	0	0	0	0	0	1	1	0
2002-09-15	34		1.5	7	28	0.5	25.4	90	16.7	9	2002	Sunday	Rainy	0	0	0	0	0	0	1	0
2002-09-16	32	36	1.5	6.5	39	0.5	25.6	87	28.75	9	2002	Monday	Rainy	1	0	0	0	0	0	1	0
2002-09-17	30	35	1.5	7	28	0	25.7	88	1.4	9	2002	Tuesday	Rainy	0	1	0	0	0	0	1	0
2002-09-18	40	33.5	2	7	20	0.5	26.2	88	43.5	9	2002	Wednesday	Rainy	0	0	1	0	0	0	1	0
2002-09-19	29	32	2	7.5	15	1	24.7	92	21.45	9	2002	Thursday	Rainy	0	0	0	1	0	0	1	0
2002-09-20	38	37	1.5	8.5	24.5	0.5	25.2	91	15.15	9	2002	Friday	Rainy	0	0	0	0	1	0	1	0
2002-09-21	37	29	1.5	5.5	13	1	25.1	90	25.1	9	2002	Saturday	Rainy	0	0	0	0	0	1	1	0
2002-09-22	30	30	0.5	4	14.5	0	25.8	86	4.9	9	2002	Sunday	Rainy	0	0	0	0	0	0	1	0
2002-09-23	39	32	1.5	3.5	31.5	0	26.3	83	6.75	9	2002	Monday	Rainy	1	0	0	0	0	0	1	0
2002-09-24	36	31	1.5	6	31.5	0.5	26.2	82	0	9	2002	Tuesday	Rainy	0	1	0	0	0	0	1	0
2002-09-25	31	36	0.5	5	49	0	26.4	80	0.8	9	2002	Wednesday	Rainy	0	0	1	0	0	0	1	0
2002-09-26	42	34	0.5	5.5	44.5	0	26.6	84	0	9	2002	Thursday	Rainy	0	0	0	1	0	0	1	0
2002-09-27	48	36	1.5	6	39.5	0.5	27.3	82	0.3	9	2002	Friday	Rainy	0	0	0	0	1	0	1	0
2002-09-28	34	34	2	6	47	0	27.4	81	9.8	9	2002	Saturday	Rainy	0	0	0	0	0	1	1	0
2002-09-29	38	24	2	5.5	32	0	26.4	84	1.35	9	2002	Sunday	Rainy	0	0	0	0	0	0	1	0
2002-09-30	27	28	0.5	5.5	34.5	0	26.9	82	0.15	9	2002	Monday	Rainy	1	0	0	0	0	0	1	0
2002-10-01	37	26.5	2	10	32	0.5	27.3	82	1.1	10	2002	Tuesday	Rainy	0	1	0	0	0	0	1	0
2002-10-02	36	28.5	0.5	5.5	44	0	26.4	83	0	10	2002	Wednesday	Rainy	0	0	1	0	0	0	1	0
2002-10-03	37	31	2	7	41	0.5	26	88	5.1	10	2002	Thursday	Rainy	0	0	0	1	0	0	1	0
2002-10-04	32	36.5	0.5	6.5	46	1	26.7	84	0	10	2002	Friday	Rainy	0	0	0	0	1	0	1	0
2002-10-05	27	36.5	1	5	39	0.5	26.1	86	0.1	10	2002	Saturday	Rainy	0	0	0	0	0	1	1	0
2002-10-06	40	20.5	0	10	22.5	0.5	26.2	78	0	10	2002	Sunday	Rainy	0	0	0	0	0	0	1	0
2002-10-07	32	32	0	10.5	29.5	0	25.7	67	0	10	2002	Monday	Rainy	1	0	0	0	0	0	1	0
2002-10-08	35	32	1	9	32	0	24.1	67	0	10	2002	Tuesday	Rainy	0	1	0	0	0	0	1	0
2002-10-09	47	43.5	1	10.5	35.5	0	23.1	68	0	10	2002	Wednesday	Rainy	0	0	1	0	0	0	1	0
2002-10-10	41	34.5	1	11	35	0	23.1	72	0	10	2002	Thursday	Rainy	0	0	0	1	0	0	1	0
2002-10-11	43	35.5	1	12	41	0.5	23.7	73	0	10	2002	Friday	Rainy	0	0	0	0	1	0	1	0
2002-10-12	44	30.5	1	11	56.5	0	24.7	75	0	10	2002	Saturday	Rainy	0	0	0	0	0	1	1	0
2002-10-13	55	33	1	12.5	40.5	0	26	73	0	10	2002	Sunday	Rainy	0	0	0	0	0	0	1	0
2002-10-14	44	40.5	1	7.5	36	0	25.8	74	0	10	2002	Monday	Rainy	1	0	0	0	0	0	1	0
2002-10-15	42	36.5	0	9	47	1	25.6	76	0	10	2002	Tuesday	Winter	0	1	0	0	0	0	0	0
2002-10-16	34	34	0	10.5	47.5	1	26.5	78	0	10	2002	Wednesday	Winter	0	0	1	0	0	0	0	0
2002-10-17	40	45.5	0	10	57	1	27.5	76	0	10	2002	Thursday	Winter	0	0	0	1	0	0	0	0
2002-10-18	40	30	0.5	8	38	0.5	27.3	80	32.25	10	2002	Friday	Winter	0	0	0	0	1	0	0	0
2002-10-19	29	26.5	0.5	5.5	24.5	0	25.7	85	0	10	2002	Saturday	Winter	0	0	0	0	0	1	0	0
2002-10-20	31	31.5	0.5	8	32.5	0.5	26.7	80	0	10	2002	Sunday	Winter	0	0	0	0	0	0	0	0
2002-10-21	38	33	1	11	52	0	27.3	78	0	10	2002	Monday	Winter	1	0	0	0	0	0	0	0
2002-10-22	33	40	1	14	31	1	26.1	86	0	10	2002	Tuesday	Winter	0	1	0	0	0	0	0	0
2002-10-23	41	36	1	8	15	0	24.4	88	0.4	10	2002	Wednesday	Winter	0	0	1	0	0	0	0	0
2002-10-24	34	38	0.5	6.5	48.5	0.5	25.3	82	0	10	2002	Thursday	Winter	0	0	0	1	0	0	0	0
2002-10-25	31	39.5	0.5	4.5	34	1	26.6	81	4.5	10	2002	Friday	Winter	0	0	0	0	1	0	0	0
2002-10-26	32	30.5	0.5	5.5	34.5	0	26.6	80	11.3	10	2002	Saturday	Winter	0	0	0	0	0	1	0	0
2002-10-27	26	26.5	0.5	8.5	21	0.5	24.8	87	14.65	10	2002	Sunday	Winter	0	0	0	0	0	0	0	0
2002-10-28	36	19.5	0.5	10	20.5	0.5	24	92	43	10	2002	Monday	Winter	1	0	0	0	0	0	0	0
2002-10-29	36	31.5	0.5	8.5	26	1	24.8	87	0	10	2002	Tuesday	Winter	0	1	0	0	0	0	0	0
2002-10-30	31	33	1	11.5	45.5	1	25.4	85	0	10	2002	Wednesday	Winter	0	0	1	0	0	0	0	0
2002-10-31	37	38.5	1	10	43	1	26.5	82	0	10	2002	Thursday	Winter	0	0	0	1	0	0	0	0
2002-11-01	45	36.5	0.5	10	49	0.5	25.4	86	14.75	11	2002	Friday	Winter	0	0	0	0	1	0	0	0
2002-11-02	28	32.5	0	10	21.5	0	23.4	91	100.7	11	2002	Saturday	Winter	0	0	0	0	0	1	0	0
2002-11-03	42	22	0	8	17	1	22.6	95	35.1	11	2002	Sunday	Winter	0	0	0	0	0	0	0	0
2002-11-04	40	53	0	5.5	15.5	1	20.5	80	0	11	2002	Monday	Winter	1	0	0	0	0	0	0	0
2002-11-05	41	42.5	0	7.5	24.5	1	21.1	77	0	11	2002	Tuesday	Winter	0	1	0	0	0	0	0	0
2002-11-06	40	44.5	0.5	8	29	1	21.6	78	0	11	2002	Wednesday	Winter	0	0	1	0	0	0	0	0
2002-11-07	53	44	0	8.5	28	1	22.5	78	0	11	2002	Thursday	Winter	0	0	0	1	0	0	0	0
2002-11-08	37	48	1	8.5	24.5	1	23.5	77	0	11	2002	Friday	Winter	0	0	0	0	1	0	0	0
2002-11-09	20	41	1	8	29	1	24.4	76	0	11	2002	Saturday	Winter	0	0	0	0	0	1	0	0
2002-11-10	33	40	0.5	10	46	1	24.3	79	0	11	2002	Sunday	Winter	0	0	0	0	0	0	0	0
2002-11-11	46	49.5	1.5	10	44	1	24.1	79	0	11	2002	Monday	Winter	1	0	0	0	0	0	0	0
2002-11-12	29	39.5	2	8	61.5	1	24	80	0	11	2002	Tuesday	Winter	0	1	0	0	0	0	0	0
2002-11-13	42	36	2	8	59.5	1	25.2	80	0	11	2002	Wednesday	Winter	0	0	1	0	0	0	0	0
2002-11-14	29	49	1.5	10	49.5	1	26	81	0	11	2002	Thursday	Winter	0	0	0	1	0	0	0	0
2002-11-15	36	41.5	1.5	11.5	50.5	1	26.2	82	0	11	2002	Friday	Winter	0	0	0	0	1	0	0	0
2002-11-16	40	34	1	8	28.5	1	26.6	79	1.15	11	2002	Saturday	Winter	0	0	0	0	0	1	0	0
2002-11-17	35	28	1	5.5	30.5	0	26.3	83	80.2	11	2002	Sunday	Winter	0	0	0	0	0	0	0	0
2002-11-18	29	21.5	1	7	20.5	0.5	25.2	84	0	11	2002	Monday	Winter	1	0	0	0	0	0	0	0
2002-11-19	44	23.5	1.5	8	34	0.5	25.1	81	0	11	2002	Tuesday	Winter	0	1	0	0	0	0	0	0
2002-11-20	38	28.5	2	10	40.5	1	24.7	81	0	11	2002	Wednesday	Winter	0	0	1	0	0	0	0	0
2002-11-21	35	34	1.5	10.5	28	1	24.8	81	0	11	2002	Thursday	Winter	0	0	0	1	0	0	0	0
2002-11-22	35	38	1.5	11	34	1	25.2	82	5.8	11	2002	Friday	Winter	0	0	0	0	1	0	0	0
2002-11-23	45	42.5	1.5	8.5	28	1	25.3	82	0	11	2002	Saturday	Winter	0	0	0	0	0	1	0	0
2002-11-24	25	27	1.5	7.5	28	1	24.8	86	0	11	2002	Sunday	Winter	0	0	0	0	0	0	0	0
2002-11-25	30	45	1.5	8.5	19.5	1	23.3	93	13.3	11	2002	Monday	Winter	1	0	0	0	0	0	0	0
2002-11-26	32	45.5	1.5	9.5	18	1	21.9	95	23.75	11	2002	Tuesday	Winter	0	1	0	0	0	0	0	0
2002-11-27	36	48.5	1	9.5	20.5	1	22.1	94	14.2	11	2002	Wednesday	Winter	0	0	1	0	0	0	0	0
2002-11-28	34	37	1.5	7.5	24	1	21.9	90	0	11	2002	Thursday	Winter	0	0	0	1	0	0	0	0
2002-11-29	33	59.5	2	11	41.5	1	23.8	87	0	11	2002	Friday	Winter	0	0	0	0	1	0	0	0
2002-11-30	37	42	1.5	9	35.5	1	24.8	85	0	11	2002	Saturday	Winter	0	0	0	0	0	1	0	0
2002-12-01	34	29.5	0	6.5	40.5	0.5	25.4	83	0	12	2002	Sunday	Winter	0	0	0	0	0	0	0	0
2002-12-02	35	34	0	9	45	0.5	24.7	84	0	12	2002	Monday	Winter	1	0	0	0	0	0	0	0
2002-12-03	33	36	0	7.5	29.5	0.5	25.1	81	0	12	2002	Tuesday	Winter	0	1	0	0	0	0	0	0
2002-12-04	27	54.5	0	10	45	0.5	25.3	82	0	12	2002	Wednesday	Winter	0	0	1	0	0	0	0	0
2002-12-05	43	42.5	0	8.5	46.5	0.5	25.5	81	0	12	2002	Thursday	Winter	0	0	0	1	0	0	0	0
2002-12-06	27	40.5	0	10	56.5	0.5	25.3	84	0	12	2002	Friday	Winter	0	0	0	0	1	0	0	0
2002-12-07	38	44.5	0	10	61	0.5	25.4	82	0	12	2002	Saturday	Winter	0	0	0	0	0	1	0	0
2002-12-08	40	41.5	0	8	42.5	0.5	25.3	82	0	12	2002	Sunday	Winter	0	0	0	0	0	0	0	0
2002-12-09	43	58	0.5	8	33.5	0.5	23.7	88	35.5	12	2002	Monday	Winter	1	0	0	0	0	0	0	0
2002-12-10	38	44	0	6.5	19	0.5	22.8	91	0.1	12	2002	Tuesday	Winter	0	1	0	0	0	0	0	0
2002-12-11	45	32.5	0	7.5	22.5	0.5	23.8	86	0.05	12	2002	Wednesday	Winter	0	0	1	0	0	0	0	0
2002-12-12	34	40	0.5	9.5	44	0.5	24.1	84	0.6	12	2002	Thursday	Winter	0	0	0	1	0	0	0	0
2002-12-13	39	44.5	0.5	9	40	0.5	24.4	81	0	12	2002	Friday	Winter	0	0	0	0	1	0	0	0
2002-12-14	32	33	1	7	32.5	1	23.4	83	0	12	2002	Saturday	Winter	0	0	0	0	0	1	0	0
2002-12-15	31	43	1	8	37	0.5	22.8	83	0	12	2002	Sunday	Winter	0	0	0	0	0	0	0	0
2002-12-16	30	37	1	9	35	1	22.6	86	0	12	2002	Monday	Winter	1	0	0	0	0	0	0	0
2002-12-17	37	49	1	7	30.5	0.5	22.9	85	0	12	2002	Tuesday	Winter	0	1	0	0	0	0	0	0
2002-12-18	34	51.5	0	9.5	47.5	0.5	22.3	82	0	12	2002	Wednesday	Winter	0	0	1	0	0	0	0	0
2002-12-19	38	39	0	10.5	52	0.5	20.8	77	0	12	2002	Thursday	Winter	0	0	0	1	0	0	0	0
2002-12-20	38	42.5	1	11	42	0.5	19.6	79	0	12	2002	Friday	Winter	0	0	0	0	1	0	0	0
2002-12-21	44	39	0.5	9.5	29	0.5	19.5	74	0	12	2002	Saturday	Winter	0	0	0	0	0	1	0	0
2002-12-22	43	51.5	1	9.5	29	0.5	19.2	74	0	12	2002	Sunday	Winter	0	0	0	0	0	0	0	0
2002-12-23	39	52.5	0	12	46.5	0.5	19	78	0	12	2002	Monday	Winter	1	0	0	0	0	0	0	0
2002-12-24	41	60	1	11	30.5	0.5	20.8	83	0	12	2002	Tuesday	Winter	0	1	0	0	0	0	0	0
2002-12-25	55	63.5	1	9	51.5	0.5	21.9	85	38.55	12	2002	Wednesday	Winter	0	0	1	0	0	0	0	0
2002-12-26	27	48.5	0.5	10	26	0.5	22.1	86	0.35	12	2002	Thursday	Winter	0	0	0	1	0	0	0	0
2002-12-27	26	33.5	0	8.5	32.5	0.5	20.9	84	0	12	2002	Friday	Winter	0	0	0	0	1	0	0	0
2002-12-28	13	33	0.5	6	24	1	22.1	82	0	12	2002	Saturday	Winter	0	0	0	0	0	1	0	0
2002-12-29	7	48	1	9.5	25	1	21.6	86	0	12	2002	Sunday	Winter	0	0	0	0	0	0	0	0
2002-12-30	13	51	1	9.5	31.5	1	22.2	87	0	12	2002	Monday	Winter	1	0	0	0	0	0	0	0
2002-12-31	4	40	1	8.5	42.5	1	22.8	85	0	12	2002	Tuesday	Winter	0	1	0	0	0	0	0	0
2003-01-01	32	43	1	16	13	1	22.1	93	6.55	1	2003	Wednesday	Winter	0	0	1	0	0	0	0	0
2003-01-02	45	48	1	17	12	1	22.9	93	1.05	1	2003	Thursday	Winter	0	0	0	1	0	0	0	0
2003-01-03	47	37	1	12	23	1	24.1	82	0	1	2003	Friday	Winter	0	0	0	0	1	0	0	0
2003-01-04	36	39	1	10	22	1	23.7	85	0	1	2003	Saturday	Winter	0	0	0	0	0	1	0	0
2003-01-05	32	34	1	15	11	1	21.3	93	12.75	1	2003	Sunday	Winter	0	0	0	0	0	0	0	0
2003-01-06	40	47	1	15	25	1	22.8	85	0	1	2003	Monday	Winter	1	0	0	0	0	0	0	0
2003-01-07	32	35	1	13	25	1	22.4	82	0	1	2003	Tuesday	Winter	0	1	0	0	0	0	0	0
2003-01-08	31	55	2	16	22	1	22.7	82	0	1	2003	Wednesday	Winter	0	0	1	0	0	0	0	0
2003-01-09	36	60	1	17	32	1	22	81	0	1	2003	Thursday	Winter	0	0	0	1	0	0	0	0
2003-01-10	49	54	1	16	34	1	22	79	0	1	2003	Friday	Winter	0	0	0	0	1	0	0	0
2003-01-11	35	73	1	19	34	1	21.8	79	0	1	2003	Saturday	Winter	0	0	0	0	0	1	0	0
2003-01-12	34	55	1	17	32	1	21.2	79	0	1	2003	Sunday	Winter	0	0	0	0	0	0	0	0
2003-01-13	47	56	1	18	41	1	20.6	80	0	1	2003	Monday	Winter	1	0	0	0	0	0	0	0
2003-01-14	42	69	2	20	44	1	20.7	81	0	1	2003	Tuesday	Winter	0	1	0	0	0	0	0	0
2003-01-15	39	59	2	19	46	1	21.2	79	0	1	2003	Wednesday	Winter	0	0	1	0	0	0	0	0
2003-01-16	29	68	2	12	34	1	20.9	80	0	1	2003	Thursday	Winter	0	0	0	1	0	0	0	0
2003-01-17	36	87	2	13	37	1	19.9	82	0	1	2003	Friday	Winter	0	0	0	0	1	0	0	0
2003-01-18	41	66	1	10	39	1	20.2	82	0	1	2003	Saturday	Winter	0	0	0	0	0	1	0	0
2003-01-19	40	59	1	17	28	1	20.6	81	0	1	2003	Sunday	Winter	0	0	0	0	0	0	0	0
2003-01-20	51	121	2	14	36	1	20.3	79	0	1	2003	Monday	Winter	1	0	0	0	0	0	0	0
2003-01-21	39	84	2	17	36	1	20	78	0	1	2003	Tuesday	Winter	0	1	0	0	0	0	0	0
2003-01-22	37	56	2	19	48	1	19.4	75	0	1	2003	Wednesday	Winter	0	0	1	0	0	0	0	0
2003-01-23	33	67	2	19	36	1	19.2	74	0	1	2003	Thursday	Winter	0	0	0	1	0	0	0	0
2003-01-24	31	71	2	21	51	1	19	76	0	1	2003	Friday	Winter	0	0	0	0	1	0	0	0
2003-01-25	45	63	3	21	46	1	19.2	76	0	1	2003	Saturday	Winter	0	0	0	0	0	1	0	0
2003-01-26	39	91	3	22	38	1	19.1	73	0	1	2003	Sunday	Winter	0	0	0	0	0	0	0	0
2003-01-27	33	74	4	23	47	1	19.9	74	0	1	2003	Monday	Winter	1	0	0	0	0	0	0	0
2003-01-28	38	85	4	28	41	1	20.9	78	0	1	2003	Tuesday	Winter	0	1	0	0	0	0	0	0
2003-01-29	51	80	4	27	37	1	22	78	0	1	2003	Wednesday	Winter	0	0	1	0	0	0	0	0
2003-01-30	48	44	4	24	36	1	21.9	78	0	1	2003	Thursday	Winter	0	0	0	1	0	0	0	0
2003-01-31	44	27	4	25	43	1	21.8	76	0	1	2003	Friday	Winter	0	0	0	0	1	0	0	0
2003-02-01	41	35	3	20	43	1	21.9	73	0	2	2003	Saturday	Winter	0	0	0	0	0	1	0	0
2003-02-02	39	60.5	0.5	11.5	43.5	1	22.5	74	0	2	2003	Sunday	Winter	0	0	0	0	0	0	0	0
2003-02-03	39	65.5	0.5	14.5	59	1	23.2	76	0	2	2003	Monday	Winter	1	0	0	0	0	0	0	0
2003-02-04	31	70.5	0.5	12.5	43	1	23.3	76	0	2	2003	Tuesday	Winter	0	1	0	0	0	0	0	0
2003-02-05	44	64.5	0.5	12	42	1	23.3	75	0	2	2003	Wednesday	Winter	0	0	1	0	0	0	0	0
2003-02-06	28	72	0.5	13.5	40	1	21.3	75	0	2	2003	Thursday	Winter	0	0	0	1	0	0	0	0
2003-02-07	34	64.5	0.5	14.5	43	1	20.1	78	0	2	2003	Friday	Winter	0	0	0	0	1	0	0	0
2003-02-08	33	57	0.5	13.5	47.5	1	21.3	74	0	2	2003	Saturday	Winter	0	0	0	0	0	1	0	0
2003-02-09	30	68	0	26	54	1	22	70	0	2	2003	Sunday	Winter	0	0	0	0	0	0	0	0
2003-02-10	50	66	1	19	58	1	21.6	73	0	2	2003	Monday	Winter	1	0	0	0	0	0	0	0
2003-02-11	35	64	1	17	45	0	24.1	72	0	2	2003	Tuesday	Winter	0	1	0	0	0	0	0	0
2003-02-12	47	60	1	16	50	0	25.4	71	0	2	2003	Wednesday	Winter	0	0	1	0	0	0	0	0
2003-02-13	30	57	1	10	39.5	1	25.4	72	0	2	2003	Thursday	Winter	0	0	0	1	0	0	0	0
2003-02-14	31	46	0.5	10	44.5	1.5	24.8	72	0	2	2003	Friday	Winter	0	0	0	0	1	0	0	0
2003-02-15	46	54	1	20	40	1	24.6	72	0	2	2003	Saturday	Summer	0	0	0	0	0	1	0	1
2003-02-16	36	39	6	11.5	39.5	0.5	23.2	64	0	2	2003	Sunday	Summer	0	0	0	0	0	0	0	1
2003-02-17	36	39.5	1.5	11	59	1	22.2	63	0	2	2003	Monday	Summer	1	0	0	0	0	0	0	1
2003-02-18	41	53	0	10	49	0.5	22.6	64	0	2	2003	Tuesday	Summer	0	1	0	0	0	0	0	1
2003-02-19	38	57	1	13	59.5	1	23	63	0	2	2003	Wednesday	Summer	0	0	1	0	0	0	0	1
2003-02-20	36	65.5	1	15	73.5	2	23.3	65	0	2	2003	Thursday	Summer	0	0	0	1	0	0	0	1
2003-02-21	42	46.5	1	15	60	1	24	63	0	2	2003	Friday	Summer	0	0	0	0	1	0	0	1
2003-02-22	41	45.5	1	13	66.5	1	24.2	65	0	2	2003	Saturday	Summer	0	0	0	0	0	1	0	1
2003-02-23	32	35	2	21	41	1	23.5	57	0	2	2003	Sunday	Summer	0	0	0	0	0	0	0	1
2003-02-24	26	37	2	22	51	1	23.7	58	0	2	2003	Monday	Summer	1	0	0	0	0	0	0	1
2003-02-25	32						23.8	61	0	2	2003	Tuesday	Summer	0	1	0	0	0	0	0	1
2003-02-26	25						24.2	59	0	2	2003	Wednesday	Summer	0	0	1	0	0	0	0	1
2003-02-27	34						23.5	57	0	2	2003	Thursday	Summer	0	0	0	1	0	0	0	1
2003-02-28	32						23.4	56	0	2	2003	Friday	Summer	0	0	0	0	1	0	0	1
2003-03-01	29						23	59	0	3	2003	Saturday	Summer	0	0	0	0	0	1	0	1
2003-03-02	48	34	3	22	45	1	24.1	55	0	3	2003	Sunday	Summer	0	0	0	0	0	0	0	1
2003-03-03	36	38	3	24	65	1	24.8	56	0	3	2003	Monday	Summer	1	0	0	0	0	0	0	1
2003-03-04	38	40	4	24	61	1	25	53	0	3	2003	Tuesday	Summer	0	1	0	0	0	0	0	1
2003-03-05	51	50	5	23	56	1	26.4	53	0	3	2003	Wednesday	Summer	0	0	1	0	0	0	0	1
2003-03-06	40	61	0.5	20	67	1	26.1	56	0	3	2003	Thursday	Summer	0	0	0	1	0	0	0	1
2003-03-07	33	68	2	23	95	1	24.7	55	0	3	2003	Friday	Summer	0	0	0	0	1	0	0	1
2003-03-08	32	55	3.5	18.5	67.5	1	25.2	55	0	3	2003	Saturday	Summer	0	0	0	0	0	1	0	1
2003-03-09	35	41	0.5	12	55	1	26.7	55	0	3	2003	Sunday	Summer	0	0	0	0	0	0	0	1
2003-03-10	43	32	2	13	34.5	1	25.6	73	1.05	3	2003	Monday	Summer	1	0	0	0	0	0	0	1
2003-03-11	37		0	14	44	1	26.1	70	0	3	2003	Tuesday	Summer	0	1	0	0	0	0	0	1
2003-03-12	42		1	14	60	1	26.7	65	12.2	3	2003	Wednesday	Summer	0	0	1	0	0	0	0	1
2003-03-13	30	58	0	14	53	0	24.9	75	1.95	3	2003	Thursday	Summer	0	0	0	1	0	0	0	1
2003-03-14	29	40	0	15	41	1	24.1	77	7.3	3	2003	Friday	Summer	0	0	0	0	1	0	0	1
2003-03-15	44	35	2	9	46	1	25.5	70	0	3	2003	Saturday	Summer	0	0	0	0	0	1	0	1
2003-03-16	36	54.5	0.5	13	56.5	1	25.7	62	0	3	2003	Sunday	Summer	0	0	0	0	0	0	0	1
2003-03-17	34	63.5	0.5	13	57	1	26.6	59	0	3	2003	Monday	Summer	1	0	0	0	0	0	0	1
2003-03-18	37	59.5	1	12	64	0.5	26.9	53	0	3	2003	Tuesday	Summer	0	1	0	0	0	0	0	1
2003-03-19	39	56.5	1.5	14	62	0.5	26.6	55	0	3	2003	Wednesday	Summer	0	0	1	0	0	0	0	1
2003-03-20	42	55.5	2	13.5	67.5	1	26.5	53	0	3	2003	Thursday	Summer	0	0	0	1	0	0	0	1
2003-03-21	49	34	1.5	8.5	43	1	27.2	54	0	3	2003	Friday	Summer	0	0	0	0	1	0	0	1
2003-03-22	41	29	1.5	5.5	39.5	1	27.4	64	0	3	2003	Saturday	Summer	0	0	0	0	0	1	0	1
2003-03-23	30	25	1.5	5	37	1	26.2	72	2.45	3	2003	Sunday	Summer	0	0	0	0	0	0	0	1
2003-03-24	40	49	1.5	6.5	53.5	1	27	69	0	3	2003	Monday	Summer	1	0	0	0	0	0	0	1
2003-03-25	45	46	1.5	4.5	44.5	1	27.6	64	0.7	3	2003	Tuesday	Summer	0	1	0	0	0	0	0	1
2003-03-26	26	45.5	1	5	45.5	1	27.2	65	0	3	2003	Wednesday	Summer	0	0	1	0	0	0	0	1
2003-03-27	35	46.5		5	52	0	28.3	63	0	3	2003	Thursday	Summer	0	0	0	1	0	0	0	1
2003-03-28	38	54	1	6.5	40	1	26.5	71	0.55	3	2003	Friday	Summer	0	0	0	0	1	0	0	1
2003-03-29	24	47	0	6	37	1	25.9	76	0	3	2003	Saturday	Summer	0	0	0	0	0	1	0	1
2003-03-30	26	38	1.5	9	35.5	1	24.8	83	22.2	3	2003	Sunday	Summer	0	0	0	0	0	0	0	1
2003-03-31	37	39.5	1.5	8	37	1	26.1	76	0	3	2003	Monday	Summer	1	0	0	0	0	0	0	1
2003-04-01	33	44	1.5	9.5	45	1	27.9	66	0	4	2003	Tuesday	Summer	0	1	0	0	0	0	0	1
2003-04-02	44	74	2	14	54.5	1	28.3	59	0	4	2003	Wednesday	Summer	0	0	1	0	0	0	0	1
2003-04-03	44	83.5	2.5	14	74	1	28	60	0	4	2003	Thursday	Summer	0	0	0	1	0	0	0	1
2003-04-04	37		1	4	94	1	28.1	60	0	4	2003	Friday	Summer	0	0	0	0	1	0	0	1
2003-04-05	40		1	3	95	1	29.1	60	0	4	2003	Saturday	Summer	0	0	0	0	0	1	0	1
2003-04-06	38		0	2	71	1	29.7	64	6.35	4	2003	Sunday	Summer	0	0	0	0	0	0	0	1
2003-04-07	41		0	4	63	1	29.2	70	0.6	4	2003	Monday	Summer	1	0	0	0	0	0	0	1
2003-04-08	45	91.5	1	18	68	1.5	29.9	61	0	4	2003	Tuesday	Summer	0	1	0	0	0	0	0	1
2003-04-09	55	122	1	6	92	1	30	58	0	4	2003	Wednesday	Summer	0	0	1	0	0	0	0	1
2003-04-10	47		0	6	85	1	30.2	60	0	4	2003	Thursday	Summer	0	0	0	1	0	0	0	1
2003-04-11	47	125	1.5	14.5	63	1	28.5	63	5.2	4	2003	Friday	Summer	0	0	0	0	1	0	0	1
2003-04-12	42	118	1	15	57.5	1	29.4	61	0	4	2003	Saturday	Summer	0	0	0	0	0	1	0	1
2003-04-13	40	70	1	15.5	66	1	28.8	61	0	4	2003	Sunday	Summer	0	0	0	0	0	0	0	1
2003-04-14	32	47	1	13	71	1	28.5	59	0	4	2003	Monday	Summer	1	0	0	0	0	0	0	1
2003-04-15	25	55.5	1	14.5	59.5	1	28.6	61	0	4	2003	Tuesday	Summer	0	1	0	0	0	0	0	1
2003-04-16	33	34.5	1	10	49	1	27.9	68	1.55	4	2003	Wednesday	Summer	0	0	1	0	0	0	0	1
2003-04-17	49	37	0.5	8.5	49.5	0.5	28.1	70	0	4	2003	Thursday	Summer	0	0	0	1	0	0	0	1
2003-04-18	38	41	0	4	63	1	28.7	65	10.95	4	2003	Friday	Summer	0	0	0	0	1	0	0	1
2003-04-19	43		0.5	11	52	1	27.8	69	0	4	2003	Saturday	Summer	0	0	0	0	0	1	0	1
2003-04-20	47	17	1	11	57	1	29.8	59	0	4	2003	Sunday	Summer	0	0	0	0	0	0	0	1
2003-04-21	45	34	1	10	46	1	28.8	65	0.05	4	2003	Monday	Summer	1	0	0	0	0	0	0	1
2003-04-22	31	36	1	10	63	1	27.9	69	0	4	2003	Tuesday	Summer	0	1	0	0	0	0	0	1
2003-04-23	38	36	1	22	57	1	28.4	63	0	4	2003	Wednesday	Summer	0	0	1	0	0	0	0	1
2003-04-24	38	33	2	17	60	1	28.3	62	0.65	4	2003	Thursday	Summer	0	0	0	1	0	0	0	1
2003-04-25	44	31	2	16	56	1	28.6	63	9	4	2003	Friday	Summer	0	0	0	0	1	0	0	1
2003-04-26	28						27.6	67	0	4	2003	Saturday	Summer	0	0	0	0	0	1	0	1
2003-04-27	25	46	1	12.5	48.5	1	28.1	70	0	4	2003	Sunday	Summer	0	0	0	0	0	0	0	1
2003-04-28	43	51	1	10	56.5	0	28.6	67	0	4	2003	Monday	Summer	1	0	0	0	0	0	0	1
2003-04-29	37	47.5	1.5	11.5	47.5	0	28.9	66	0	4	2003	Tuesday	Summer	0	1	0	0	0	0	0	1
2003-04-30	37	48	0	6	41	0	28.6	64	23.6	4	2003	Wednesday	Summer	0	0	1	0	0	0	0	1
2003-05-01	33	53	0	5	36	0	23.9	88	42.6	5	2003	Thursday	Summer	0	0	0	1	0	0	0	1
2003-05-02	33	55	0	7	53	0	26	81	2.45	5	2003	Friday	Summer	0	0	0	0	1	0	0	1
2003-05-03	23	24	2.5	10.5	41	0	27.1	69	0	5	2003	Saturday	Summer	0	0	0	0	0	1	0	1
2003-05-04	40	31	1.5	10	35.5	0	29.7	64	0	5	2003	Sunday	Summer	0	0	0	0	0	0	0	1
2003-05-05	52	47.5	1	9	44	0	30	66	0	5	2003	Monday	Summer	1	0	0	0	0	0	0	1
2003-05-06	45	57	1.5	13.5	53	1	30.6	63	0	5	2003	Tuesday	Summer	0	1	0	0	0	0	0	1
2003-05-07	52	72.5	2	12.5	62	1	30.2	61	0	5	2003	Wednesday	Summer	0	0	1	0	0	0	0	1
2003-05-08	39	82.5	2	13	71.5	1	30.9	58	0	5	2003	Thursday	Summer	0	0	0	1	0	0	0	1
2003-05-09	30	51.5	1.5	10.5	51.5	0.5	27.8	71	0	5	2003	Friday	Summer	0	0	0	0	1	0	0	1
2003-05-10	32	46.5	1	7.5	55.5	0.5	28.4	69	0	5	2003	Saturday	Summer	0	0	0	0	0	1	0	1
2003-05-11	26	38	0	5.5	36.5	0.5	27.9	74	0	5	2003	Sunday	Summer	0	0	0	0	0	0	0	1
2003-05-12	33	27.5	0	6.5	45	0.5	27.2	77	16.85	5	2003	Monday	Summer	1	0	0	0	0	0	0	1
2003-05-13	29	25.5	0	6.5	46.5	0.5	26.8	85	1.45	5	2003	Tuesday	Summer	0	1	0	0	0	0	0	1
2003-05-14	35	23	0.5	8.5	31	0.5	28	78	0	5	2003	Wednesday	Summer	0	0	1	0	0	0	0	1
2003-05-15	33	29.5	1	7	33	0.5	28.7	72	0	5	2003	Thursday	Rainy	0	0	0	1	0	0	1	0
2003-05-16	34	41.5	1	9	35.5	0.5	28.6	69	0	5	2003	Friday	Rainy	0	0	0	0	1	0	1	0
2003-05-17	28	25.5	1	7	30	0.5	27.9	73	0	5	2003	Saturday	Rainy	0	0	0	0	0	1	1	0
2003-05-18	32	22	1	7	28	0	27.2	73	1.3	5	2003	Sunday	Rainy	0	0	0	0	0	0	1	0
2003-05-19	28	26	0.5	9	23.5	0.5	26	84	4	5	2003	Monday	Rainy	1	0	0	0	0	0	1	0
2003-05-20	36	31	1	9	24.5	0.5	26.7	81	5.6	5	2003	Tuesday	Rainy	0	1	0	0	0	0	1	0
2003-05-21	46	36	1	9.5	45	0.5	27	76	0	5	2003	Wednesday	Rainy	0	0	1	0	0	0	1	0
2003-05-22	38	39.5	1	9.5	47.5	1	28.5	70	1.1	5	2003	Thursday	Rainy	0	0	0	1	0	0	1	0
2003-05-23	37	36	1	10.5	53	1	29.1	71	0	5	2003	Friday	Rainy	0	0	0	0	1	0	1	0
2003-05-24	26	37	1	7	31	0.5	28.2	74	0	5	2003	Saturday	Rainy	0	0	0	0	0	1	1	0
2003-05-25	39	39.5	0.5	8	41.5	0.5	29.1	70	0	5	2003	Sunday	Rainy	0	0	0	0	0	0	1	0
2003-05-26	40	20	1	13	35	1	30.5	61	0	5	2003	Monday	Rainy	1	0	0	0	0	0	1	0
2003-05-27	37	20	0	13	37	1	29.9	63	5.5	5	2003	Tuesday	Rainy	0	1	0	0	0	0	1	0
2003-05-28	37	25	2	10	41	1	29.4	70	0	5	2003	Wednesday	Rainy	0	0	1	0	0	0	1	0
2003-05-29	35	59	1	9.5	56.5	0.5	29.8	68	0	5	2003	Thursday	Rainy	0	0	0	1	0	0	1	0
2003-05-30	25	52	1.5	9.5	26	0.5	28.5	74	0.5	5	2003	Friday	Rainy	0	0	0	0	1	0	1	0
2003-05-31	23	33	1.5	10	34	1	25.6	89	32.9	5	2003	Saturday	Rainy	0	0	0	0	0	1	1	0
2003-06-01	24	33.5	1.5	10.5	42	1	26.2	88	4.55	6	2003	Sunday	Rainy	0	0	0	0	0	0	1	0
2003-06-02	45	28.5	1	11	40	1	25.8	89	3.2	6	2003	Monday	Rainy	1	0	0	0	0	0	1	0
2003-06-03	35	21.5	0	7	25	0	26.6	86	9.05	6	2003	Tuesday	Rainy	0	1	0	0	0	0	1	0
2003-06-04	24	26.5	0.5	7.5	26.5	0	26.8	83	0.8	6	2003	Wednesday	Rainy	0	0	1	0	0	0	1	0
2003-06-05	33	30	1.5	8	22.5	0	26.2	83	0.5	6	2003	Thursday	Rainy	0	0	0	1	0	0	1	0
2003-06-06	39	37.5	1	8.5	19.5	0	26.8	77	1.75	6	2003	Friday	Rainy	0	0	0	0	1	0	1	0
2003-06-07	37	26.5	0.5	6.5	27	0	26.9	81	0.05	6	2003	Saturday	Rainy	0	0	0	0	0	1	1	0
2003-06-08	40	27	1	6.5	36	0	27.1	80	9.8	6	2003	Sunday	Rainy	0	0	0	0	0	0	1	0
2003-06-09	30	31	1	7.5	49.5	0	27.7	75	0	6	2003	Monday	Rainy	1	0	0	0	0	0	1	0
2003-06-10	43	31.5	1	8.5	43.5	1	26.7	81	4.85	6	2003	Tuesday	Rainy	0	1	0	0	0	0	1	0
2003-06-11	34	34	1	9.5	25	0.5	26.8	79	0	6	2003	Wednesday	Rainy	0	0	1	0	0	0	1	0
2003-06-12	35	57	0.5	10	34.5	0.5	27.4	74	0.2	6	2003	Thursday	Rainy	0	0	0	1	0	0	1	0
2003-06-13	31	49.5	0.5	11.5	46.5	0.5	27.1	78	0	6	2003	Friday	Rainy	0	0	0	0	1	0	1	0
2003-06-14	41	39.5	0.5	8	43.5	0.5	27.7	78	0	6	2003	Saturday	Rainy	0	0	0	0	0	1	1	0
2003-06-15	47	30	1	7.5	42	0	27.8	79	6.6	6	2003	Sunday	Rainy	0	0	0	0	0	0	1	0
2003-06-16	30	25	0.5	8	44	0	26.6	85	7.35	6	2003	Monday	Rainy	1	0	0	0	0	0	1	0
2003-06-17	38	30	0	4	33	0	26.6	84	0.1	6	2003	Tuesday	Rainy	0	1	0	0	0	0	1	0
2003-06-18	36	20	0	7	33.5	0	26.8	84	0	6	2003	Wednesday	Rainy	0	0	1	0	0	0	1	0
2003-06-19	34	28	0	6.5	29	0	27.2	79	0.6	6	2003	Thursday	Rainy	0	0	0	1	0	0	1	0
2003-06-20	39	23	0	3	26	0	26.1	84	0.35	6	2003	Friday	Rainy	0	0	0	0	1	0	1	0
2003-06-21	27	28	1	5	22	0	26.6	83	13.55	6	2003	Saturday	Rainy	0	0	0	0	0	1	1	0
2003-06-22	30	27.5	1	7.5	27.5	0.5	27.1	82	0.4	6	2003	Sunday	Rainy	0	0	0	0	0	0	1	0
2003-06-23	42	25	1	7.5	25	0.5	27.2	81	15.2	6	2003	Monday	Rainy	1	0	0	0	0	0	1	0
2003-06-24	22	20	0.5	7	26.5	0.5	27	84	0.2	6	2003	Tuesday	Rainy	0	1	0	0	0	0	1	0
2003-06-25	26	21	1	6.5	25.5	0.5	26	82	2.5	6	2003	Wednesday	Rainy	0	0	1	0	0	0	1	0
2003-06-26	28	33.5	1	8	28	0.5	26.6	80	1.2	6	2003	Thursday	Rainy	0	0	0	1	0	0	1	0
2003-06-27	37	31	0.5	7.5	45	0	26.9	79	21	6	2003	Friday	Rainy	0	0	0	0	1	0	1	0
2003-06-28	42	22	0	9.5	38.5	0	24.7	93	11.85	6	2003	Saturday	Rainy	0	0	0	0	0	1	1	0
2003-06-29	30	19.5	0	9	27	0.5	25.4	91	8.6	6	2003	Sunday	Rainy	0	0	0	0	0	0	1	0
2003-06-30	33	21.5	0.5	7	28.5	0.5	24.8	91	6.35	6	2003	Monday	Rainy	1	0	0	0	0	0	1	0
2003-07-01	28	23	1	7.5	20	0.5	25	90	3.55	7	2003	Tuesday	Rainy	0	1	0	0	0	0	1	0
2003-07-02	39	21	0	6	29.5	0.5	26.3	82	4.65	7	2003	Wednesday	Rainy	0	0	1	0	0	0	1	0
2003-07-03	35	25	0	8	32.5	0.5	27.1	80	5.65	7	2003	Thursday	Rainy	0	0	0	1	0	0	1	0
2003-07-04	35	25.5	0	9	41	0	27.2	81	0	7	2003	Friday	Rainy	0	0	0	0	1	0	1	0
2003-07-05	31	33.5	1	6.5	34.5	0	27.6	79	0	7	2003	Saturday	Rainy	0	0	0	0	0	1	1	0
2003-07-06	35	37.5	1	9	42	0	27.5	80	0	7	2003	Sunday	Rainy	0	0	0	0	0	0	1	0
2003-07-07	30	47	1	9.5	25	0	27.7	80	1.2	7	2003	Monday	Rainy	1	0	0	0	0	0	1	0
2003-07-08	28	32.5	1	8	30.5	0	26.7	82	5.2	7	2003	Tuesday	Rainy	0	1	0	0	0	0	1	0
2003-07-09	39	27	0.5	7.5	21.5	0	27.3	81	8.55	7	2003	Wednesday	Rainy	0	0	1	0	0	0	1	0
2003-07-10	39	32	1	6.5	25	0	27.4	82	0.1	7	2003	Thursday	Rainy	0	0	0	1	0	0	1	0
2003-07-11	41	33	1	8.5	22	0.5	27.3	79	0	7	2003	Friday	Rainy	0	0	0	0	1	0	1	0
2003-07-12	38	40.5	0.5	8	21.5	0.5	26.5	85	1.85	7	2003	Saturday	Rainy	0	0	0	0	0	1	1	0
2003-07-13	38	36.5	2	8	29	1	26.8	85	1.7	7	2003	Sunday	Rainy	0	0	0	0	0	0	1	0
2003-07-14	36	26	2.5	7	23	0	26.8	83	3.95	7	2003	Monday	Rainy	1	0	0	0	0	0	1	0
2003-07-15	36	31	2	6.5	22.5	0	27.3	80	0	7	2003	Tuesday	Rainy	0	1	0	0	0	0	1	0
2003-07-16	38	30.5	1.5	8.5	40.5	0.5	27.7	76	0.9	7	2003	Wednesday	Rainy	0	0	1	0	0	0	1	0
2003-07-17	39	32	1.5	9	24	0.5	29	70	0	7	2003	Thursday	Rainy	0	0	0	1	0	0	1	0
2003-07-18	31	37	1	9	49	0	29.2	71	0	7	2003	Friday	Rainy	0	0	0	0	1	0	1	0
2003-07-19	37	34.5	1	8	32	0	28.6	77	2.8	7	2003	Saturday	Rainy	0	0	0	0	0	1	1	0
2003-07-20	41	42.5	0.5	6.5	40.5	0.5	28.1	79	0.05	7	2003	Sunday	Rainy	0	0	0	0	0	0	1	0
2003-07-21	29	45	0.5	7.5	36.5	0.5	27.6	80	3.35	7	2003	Monday	Rainy	1	0	0	0	0	0	1	0
2003-07-22	33	37.5	0	5.5	34	0	27.8	80	0	7	2003	Tuesday	Rainy	0	1	0	0	0	0	1	0
2003-07-23	41	40	0.5	7	29	0.5	27.1	85	4.3	7	2003	Wednesday	Rainy	0	0	1	0	0	0	1	0
2003-07-24	29	24.5	0	5	19	0	26	86	1.1	7	2003	Thursday	Rainy	0	0	0	1	0	0	1	0
2003-07-25	25	35.5	0	5.5	22	0	26.6	79	0.6	7	2003	Friday	Rainy	0	0	0	0	1	0	1	0
2003-07-26	43	23	0	4.5	23	0	26.7	82	2.45	7	2003	Saturday	Rainy	0	0	0	0	0	1	1	0
2003-07-27	40	27	0.5	5.5	38.5	0	27.6	78	0	7	2003	Sunday	Rainy	0	0	0	0	0	0	1	0
2003-07-28	47	45	0.5	5.5	47.5	1	28.2	76	0	7	2003	Monday	Rainy	1	0	0	0	0	0	1	0
2003-07-29	24	37.5	0.5	7.5	29	1	27.3	81	0.2	7	2003	Tuesday	Rainy	0	1	0	0	0	0	1	0
2003-07-30	27	30	0.5	7	29	1	26.7	82	2.25	7	2003	Wednesday	Rainy	0	0	1	0	0	0	1	0
2003-07-31	32	28	0.5	5	32	0.5	27.2	79	0.2	7	2003	Thursday	Rainy	0	0	0	1	0	0	1	0
2003-08-01	30	51.5	1	7.5	30	1	27.6	77	0	8	2003	Friday	Rainy	0	0	0	0	1	0	1	0
2003-08-02	43	39.5	1	7.5	22.5	0	28.4	69	0.1	8	2003	Saturday	Rainy	0	0	0	0	0	1	1	0
2003-08-03	25	32.5	1.5	8.5	23	0.5	24.7	87	23.45	8	2003	Sunday	Rainy	0	0	0	0	0	0	1	0
2003-08-04	33	36	0.5	7	42	0.5	26.9	81	2	8	2003	Monday	Rainy	1	0	0	0	0	0	1	0
2003-08-05	36	31.5	0.5	5.5	45.5	0.5	28.4	76	0	8	2003	Tuesday	Rainy	0	1	0	0	0	0	1	0
2003-08-06	48	29.5	1	5	40	0.5	29.1	70	0	8	2003	Wednesday	Rainy	0	0	1	0	0	0	1	0
2003-08-07	34	34	0.5	6	37	0	28.1	75	3.2	8	2003	Thursday	Rainy	0	0	0	1	0	0	1	0
2003-08-08	25	34	0.5	7	35	0.5	27.7	82	1.25	8	2003	Friday	Rainy	0	0	0	0	1	0	1	0
2003-08-09	31	44.5	1	7.5	26.5	0	27.4	80	0.05	8	2003	Saturday	Rainy	0	0	0	0	0	1	1	0
2003-08-10	34	45.5	1	7.5	23	0.5	27.6	76	0	8	2003	Sunday	Rainy	0	0	0	0	0	0	1	0
2003-08-11	23	71	2	10.5	35.5	0.5	27.2	81	10	8	2003	Monday	Rainy	1	0	0	0	0	0	1	0
2003-08-12	32	25	1	6	5	0.5	24.2	98	15.55	8	2003	Tuesday	Rainy	0	1	0	0	0	0	1	0
2003-08-13	41	28.5	0.5	7	38.5	0.5	26.5	85	0	8	2003	Wednesday	Rainy	0	0	1	0	0	0	1	0
2003-08-14	39	30	0.5	6	32.5	0	27.6	82	0	8	2003	Thursday	Rainy	0	0	0	1	0	0	1	0
2003-08-15	43	36	1	6.5	47	0.5	28.8	73	0	8	2003	Friday	Rainy	0	0	0	0	1	0	1	0
2003-08-16	29	43	1	3	46	0	27.8	80	13.95	8	2003	Saturday	Rainy	0	0	0	0	0	1	1	0
2003-08-17	36	20	1	3	14	0	25.6	94	14.75	8	2003	Sunday	Rainy	0	0	0	0	0	0	1	0
2003-08-18	40	28	1	3	32	0	26.6	85	1	8	2003	Monday	Rainy	1	0	0	0	0	0	1	0
2003-08-19	41	30	1	3	31	0	26.6	86	17.25	8	2003	Tuesday	Rainy	0	1	0	0	0	0	1	0
2003-08-20	31	20	1	9	7	1	25.5	92	29.4	8	2003	Wednesday	Rainy	0	0	1	0	0	0	1	0
2003-08-21	43	24	2	6.5	20	0.5	25.8	89	13.3	8	2003	Thursday	Rainy	0	0	0	1	0	0	1	0
2003-08-22	33	33	2	7.5	32	0.5	26.2	85	0	8	2003	Friday	Rainy	0	0	0	0	1	0	1	0
2003-08-23	47	52.5	2.5	9.5	31.5	0.5	26.2	84	8.85	8	2003	Saturday	Rainy	0	0	0	0	0	1	1	0
2003-08-24	29	35.5	2	6	10.5	0.5	24.4	95	10.6	8	2003	Sunday	Rainy	0	0	0	0	0	0	1	0
2003-08-25	40	25	1.5	4.5	34.5	0.5	26.8	85	0	8	2003	Monday	Rainy	1	0	0	0	0	0	1	0
2003-08-26	36	27	2	9	14	1	26.5	83	1.1	8	2003	Tuesday	Rainy	0	1	0	0	0	0	1	0
2003-08-27	26	44	2	8	18	0	26.2	79	0	8	2003	Wednesday	Rainy	0	0	1	0	0	0	1	0
2003-08-28	29	36	2	10	24	1	25.7	84	0	8	2003	Thursday	Rainy	0	0	0	1	0	0	1	0
2003-08-29	38	37	1	3	55	0	26.6	81	0	8	2003	Friday	Rainy	0	0	0	0	1	0	1	0
2003-08-30	41	36	2	4	46	0	26.4	81	1.45	8	2003	Saturday	Rainy	0	0	0	0	0	1	1	0
2003-08-31	25	37	1	16	33	0.5	27.7	78	7.5	8	2003	Sunday	Rainy	0	0	0	0	0	0	1	0
2003-09-01	43	34.5	1	18	43.5	0.5	26.3	85	9.05	9	2003	Monday	Rainy	1	0	0	0	0	0	1	0
2003-09-02	25	45	1	10	37.5	0.5	25.8	90	5.5	9	2003	Tuesday	Rainy	0	1	0	0	0	0	1	0
2003-09-03	34	41	0.5	8	13.5	1	25.6	92	0.1	9	2003	Wednesday	Rainy	0	0	1	0	0	0	1	0
2003-09-04	36	34.5	0.5	7.5	34.5	0.5	26	88	68.85	9	2003	Thursday	Rainy	0	0	0	1	0	0	1	0
2003-09-05	26	24.5	0.5	6.5	25	0.5	26.5	84	22.5	9	2003	Friday	Rainy	0	0	0	0	1	0	1	0
2003-09-06	28	29.5	0.5	7.5	25.5	0.5	25.4	91	4.35	9	2003	Saturday	Rainy	0	0	0	0	0	1	1	0
2003-09-07	40	34.5	0.5	6	38.5	0.5	26.2	84	2.05	9	2003	Sunday	Rainy	0	0	0	0	0	0	1	0
2003-09-08	41	38.5	1	7	39	0.5	26.8	81	0.25	9	2003	Monday	Rainy	1	0	0	0	0	0	1	0
2003-09-09	47	32	1.5	5.5	16	0.5	25.4	90	24.15	9	2003	Tuesday	Rainy	0	1	0	0	0	0	1	0
2003-09-10	28	21	0.5	5.5	24.5	0	26.7	84	25.65	9	2003	Wednesday	Rainy	0	0	1	0	0	0	1	0
2003-09-11	28	19	1	8.5	18.5	0.5	24.4	94	6.3	9	2003	Thursday	Rainy	0	0	0	1	0	0	1	0
2003-09-12	32	24.5	0	8	22	0	26.1	86	38	9	2003	Friday	Rainy	0	0	0	0	1	0	1	0
2003-09-13	38	25.5	0.5	9	28	1	25.5	91	12.4	9	2003	Saturday	Rainy	0	0	0	0	0	1	1	0
2003-09-14	31	23	0.5	5	18	0.5	25.9	86	6.8	9	2003	Sunday	Rainy	0	0	0	0	0	0	1	0
2003-09-15	37	23.5	0	7.5	33	0.5	26.8	83	0.8	9	2003	Monday	Rainy	1	0	0	0	0	0	1	0
2003-09-16	41	28.5	1.5	6	30.5	0.5	28.1	75	0	9	2003	Tuesday	Rainy	0	1	0	0	0	0	1	0
2003-09-17	39	33	1.5	7.5	41.5	0.5	29.1	70	0	9	2003	Wednesday	Rainy	0	0	1	0	0	0	1	0
2003-09-18	31	39.5	1	7	47	1	29	72	1.6	9	2003	Thursday	Rainy	0	0	0	1	0	0	1	0
2003-09-19	26	36.5	0	6.5	60	1	27.5	80	0.4	9	2003	Friday	Rainy	0	0	0	0	1	0	1	0
2003-09-20	39	31	0	7	57	1	26.9	86	6.05	9	2003	Saturday	Rainy	0	0	0	0	0	1	1	0
2003-09-21	46	31	0	5	45	0.5	27.4	83	14.95	9	2003	Sunday	Rainy	0	0	0	0	0	0	1	0
2003-09-22	21	37.5	0.5	8	26.5	1	25.9	89	0.2	9	2003	Monday	Rainy	1	0	0	0	0	0	1	0
2003-09-23	31	55	0	7	31.5	1	25.7	91	15.9	9	2003	Tuesday	Rainy	0	1	0	0	0	0	1	0
2003-09-24	28	38	0	6.5	24	1	25.8	88	9.5	9	2003	Wednesday	Rainy	0	0	1	0	0	0	1	0
2003-09-25	35	41.5	0.5	8	35.5	1	25.8	89	0	9	2003	Thursday	Rainy	0	0	0	1	0	0	1	0
2003-09-26	30	43	0	8	37	1	26	87	1.6	9	2003	Friday	Rainy	0	0	0	0	1	0	1	0
2003-09-27	33	38	1	6.5	57.5	1	26.8	82	0	9	2003	Saturday	Rainy	0	0	0	0	0	1	1	0
2003-09-28	35	53	1	8	65	1	26.9	82	0	9	2003	Sunday	Rainy	0	0	0	0	0	0	1	0
2003-09-29	41	58	1.5	7	61	1	27.4	83	0	9	2003	Monday	Rainy	1	0	0	0	0	0	1	0
2003-09-30	50	52	1.5	7.5	54.5	1	27.5	83	0	9	2003	Tuesday	Rainy	0	1	0	0	0	0	1	0
2003-10-01	33	45	1	6	43	0.5	26.2	90	2.75	10	2003	Wednesday	Rainy	0	0	1	0	0	0	1	0
2003-10-02	30	39	1.5	7	30.5	0.5	26.8	83	0.6	10	2003	Thursday	Rainy	0	0	0	1	0	0	1	0
2003-10-03	38	33.5	1.5	7	26.5	0.5	27.2	77	2.55	10	2003	Friday	Rainy	0	0	0	0	1	0	1	0
2003-10-04	34	27.5	1.5	7	30	0	26	80	0	10	2003	Saturday	Rainy	0	0	0	0	0	1	1	0
2003-10-05	21	43.5	0.5	6	26.5	0	26.3	78	0.4	10	2003	Sunday	Rainy	0	0	0	0	0	0	1	0
2003-10-06	29	49	1.5	7.5	29.5	0	27.1	78	0	10	2003	Monday	Rainy	1	0	0	0	0	0	1	0
2003-10-07	26	47	1.5	7.5	42	0	26.9	80	0.25	10	2003	Tuesday	Rainy	0	1	0	0	0	0	1	0
2003-10-08	37	40.5	1.5	6.5	42.5	0	27.6	80	0	10	2003	Wednesday	Rainy	0	0	1	0	0	0	1	0
2003-10-09	42	55.5	1.5	4.5	48.5	0	27.9	79	0	10	2003	Thursday	Rainy	0	0	0	1	0	0	1	0
2003-10-10	39	29.5	1	2	39	0	27.7	80	0	10	2003	Friday	Rainy	0	0	0	0	1	0	1	0
2003-10-11	32	44.5	1	4	38.5	0.5	28.1	79	0	10	2003	Saturday	Rainy	0	0	0	0	0	1	1	0
2003-10-12	42	31.5	1	2	51	0	28.4	77	0	10	2003	Sunday	Rainy	0	0	0	0	0	0	1	0
2003-10-13	52	34	1	3	34	0	28.8	77	6	10	2003	Monday	Rainy	1	0	0	0	0	0	1	0
2003-10-14	27	32.5	0.5	4	47	0	26.5	83	0	10	2003	Tuesday	Rainy	0	1	0	0	0	0	1	0
2003-10-15	25	26	1	4	29.5	0	26.3	81	0	10	2003	Wednesday	Winter	0	0	1	0	0	0	0	0
2003-10-16	26	36	1	7.5	20	1	27	77	0	10	2003	Thursday	Winter	0	0	0	1	0	0	0	0
2003-10-17	35	30	1	7.5	27	1	26.7	76	0	10	2003	Friday	Winter	0	0	0	0	1	0	0	0
2003-10-18	35	42	1	8	46	0.5	26.8	78	0	10	2003	Saturday	Winter	0	0	0	0	0	1	0	0
2003-10-19	40	31.5	1	8.5	46.5	0	25.9	83	0.2	10	2003	Sunday	Winter	0	0	0	0	0	0	0	0
2003-10-20	31	55	1	12.5	41	1	25	89	3.85	10	2003	Monday	Winter	1	0	0	0	0	0	0	0
2003-10-21	34	64	1	10	53	1	25.7	81	0	10	2003	Tuesday	Winter	0	1	0	0	0	0	0	0
2003-10-22	33	61	1	9	47	0.5	26.8	77	0	10	2003	Wednesday	Winter	0	0	1	0	0	0	0	0
2003-10-23	34	75.5	1	5.5	39.5	0.5	25.7	82	0	10	2003	Thursday	Winter	0	0	0	1	0	0	0	0
2003-10-24	30	83	0.5	10	54.5	1	25.2	79	0	10	2003	Friday	Winter	0	0	0	0	1	0	0	0
2003-10-25	38	83	1	12	54.5	1	25.2	77	0	10	2003	Saturday	Winter	0	0	0	0	0	1	0	0
2003-10-26	36	84.5	1	11	51	1	25.5	79	0	10	2003	Sunday	Winter	0	0	0	0	0	0	0	0
2003-10-27	35	89	1	14.5	73.5	1	25.5	78	0	10	2003	Monday	Winter	1	0	0	0	0	0	0	0
2003-10-28	46	89	1.5	12	56.5	1	26	78	0	10	2003	Tuesday	Winter	0	1	0	0	0	0	0	0
2003-10-29	38	74	3	11.5	41	1	26.9	73	0	10	2003	Wednesday	Winter	0	0	1	0	0	0	0	0
2003-10-30	33	60	2.5	10.5	40	1	26	80	0	10	2003	Thursday	Winter	0	0	0	1	0	0	0	0
2003-10-31	26	70.5	2	12.5	46	1	25.2	78	0	10	2003	Friday	Winter	0	0	0	0	1	0	0	0
2003-11-01	29	64	1.5	12	65.5	1	25.6	79	0	11	2003	Saturday	Winter	0	0	0	0	0	1	0	0
2003-11-02	43	58	1.5	12.5	48.5	1	25.8	78	0	11	2003	Sunday	Winter	0	0	0	0	0	0	0	0
2003-11-03	38	76	2	13	37	1	26.3	75	0	11	2003	Monday	Winter	1	0	0	0	0	0	0	0
2003-11-04	46	63	1	11.5	53.5	1	25.7	79	4.45	11	2003	Tuesday	Winter	0	1	0	0	0	0	0	0
2003-11-05	34	59	0.5	13.5	51.5	1	25.2	81	0	11	2003	Wednesday	Winter	0	0	1	0	0	0	0	0
2003-11-06	32	48.5	0.5	14	58	1	25	76	0	11	2003	Thursday	Winter	0	0	0	1	0	0	0	0
2003-11-07	29	52.5	0.5	15	47.5	1	23.4	67	0	11	2003	Friday	Winter	0	0	0	0	1	0	0	0
2003-11-08	43	45.5	0.5	15	45.5	1	23.2	69	0	11	2003	Saturday	Winter	0	0	0	0	0	1	0	0
2003-11-09	37	56.5	0.5	12.5	55	0.5	24.2	70	0	11	2003	Sunday	Winter	0	0	0	0	0	0	0	0
2003-11-10	41	60.5	0	13.5	38.5	1	24.7	70	0	11	2003	Monday	Winter	1	0	0	0	0	0	0	0
2003-11-11	34	36	0.5	10.5	34.5	0.5	24.5	70	0	11	2003	Tuesday	Winter	0	1	0	0	0	0	0	0
2003-11-12	41	41	1	10	24	1	24.2	75	0	11	2003	Wednesday	Winter	0	0	1	0	0	0	0	0
2003-11-13	28	46	0.5	11.5	28.5	1	24.4	72	0	11	2003	Thursday	Winter	0	0	0	1	0	0	0	0
2003-11-14	24	35	0.5	10.5	23	0.5	24.4	71	0	11	2003	Friday	Winter	0	0	0	0	1	0	0	0
2003-11-15	29	46	2	10.5	25	0.5	25	69	0	11	2003	Saturday	Winter	0	0	0	0	0	1	0	0
2003-11-16	44	38	2.5	10	46	0.5	25.7	72	0	11	2003	Sunday	Winter	0	0	0	0	0	0	0	0
2003-11-17	28	45	2	13	55	1	26.2	69	0	11	2003	Monday	Winter	1	0	0	0	0	0	0	0
2003-11-18	33	59	1.5	12.5	58	1	25.2	73	0	11	2003	Tuesday	Winter	0	1	0	0	0	0	0	0
2003-11-19	23	60	1	12	59.5	1	24.5	72	0	11	2003	Wednesday	Winter	0	0	1	0	0	0	0	0
2003-11-20	31	39.5	1.5	13.5	52	1	23.9	70	0	11	2003	Thursday	Winter	0	0	0	1	0	0	0	0
2003-11-21	34	41.5	2	15	53	1	22.7	67	0	11	2003	Friday	Winter	0	0	0	0	1	0	0	0
2003-11-22	31	50	2	17	62.5	1	22.8	73	0	11	2003	Saturday	Winter	0	0	0	0	0	1	0	0
2003-11-23	39	65	1	13	45.5	1	23.9	74	0	11	2003	Sunday	Winter	0	0	0	0	0	0	0	0
2003-11-24	26	59	1.5	15	67	0.5	23.1	70	0	11	2003	Monday	Winter	1	0	0	0	0	0	0	0
2003-11-25	35	44	1.5	14.5	52	0.5	22.5	70	0	11	2003	Tuesday	Winter	0	1	0	0	0	0	0	0
2003-11-26	50	48.5	2	13	50	0.5	23.7	71	0	11	2003	Wednesday	Winter	0	0	1	0	0	0	0	0
2003-11-27	41	75	2	23	40	1	24.7	73	0	11	2003	Thursday	Winter	0	0	0	1	0	0	0	0
2003-11-28	40	73	2	21	41	0	24.2	72	0	11	2003	Friday	Winter	0	0	0	0	1	0	0	0
2003-11-29	38	81	2	22	43	0	24.1	69	0	11	2003	Saturday	Winter	0	0	0	0	0	1	0	0
2003-11-30	42	89	2	23	57	1	21.8	73	0	11	2003	Sunday	Winter	0	0	0	0	0	0	0	0
2003-12-01	36	89	2	25	55	1	21.9	74	0	12	2003	Monday	Winter	1	0	0	0	0	0	0	0
2003-12-02	38	84	2	26	48	1	22.2	73	0	12	2003	Tuesday	Winter	0	1	0	0	0	0	0	0
2003-12-03	39	73	2	20	45	1	21	76	0	12	2003	Wednesday	Winter	0	0	1	0	0	0	0	0
2003-12-04	36	74.5	2	16.5	42	1	20.7	73	0	12	2003	Thursday	Winter	0	0	0	1	0	0	0	0
2003-12-05	39	77	2	19.5	57.5	1	20.3	73	0	12	2003	Friday	Winter	0	0	0	0	1	0	0	0
2003-12-06	43	96	2.5	18.5	66	1	21	72	0	12	2003	Saturday	Winter	0	0	0	0	0	1	0	0
2003-12-07	26	58	2	16.5	42.5	1	22.4	69	0	12	2003	Sunday	Winter	0	0	0	0	0	0	0	0
2003-12-08	27	60.5	2	19	45	1	23.4	68	0	12	2003	Monday	Winter	1	0	0	0	0	0	0	0
2003-12-09	38	76.5	2	18	43.5	1	23.1	70	0	12	2003	Tuesday	Winter	0	1	0	0	0	0	0	0
2003-12-10	44	84	2	20	57.5	1	23	71	0	12	2003	Wednesday	Winter	0	0	1	0	0	0	0	0
2003-12-11	35	74	2.5	21	43.5	1	23	73	0	12	2003	Thursday	Winter	0	0	0	1	0	0	0	0
2003-12-12	34	60	2	24	51	1	22.7	75	0	12	2003	Friday	Winter	0	0	0	0	1	0	0	0
2003-12-13	44	70	2.5	14	33	1	22.9	73	0	12	2003	Saturday	Winter	0	0	0	0	0	1	0	0
2003-12-14	32	40	1.5	11	34.5	1	22.4	66	0	12	2003	Sunday	Winter	0	0	0	0	0	0	0	0
2003-12-15	25	62.5	1.5	13	46.5	1	21.7	66	0	12	2003	Monday	Winter	1	0	0	0	0	0	0	0
2003-12-16	33	72	2	13.5	41	1	20.8	67	0	12	2003	Tuesday	Winter	0	1	0	0	0	0	0	0
2003-12-17	43	84	1.5	14	41.5	1	20.3	68	0	12	2003	Wednesday	Winter	0	0	1	0	0	0	0	0
2003-12-18	39	112	2.5	20	59.5	1	19.8	72	0	12	2003	Thursday	Winter	0	0	0	1	0	0	0	0
2003-12-19	37	99	1.5	14.5	52.5	1	21.5	71	0	12	2003	Friday	Winter	0	0	0	0	1	0	0	0
2003-12-20	47	98.5	1	15.5	38.5	1	22.8	60	0	12	2003	Saturday	Winter	0	0	0	0	0	1	0	0
2003-12-21	33	84	1.5	16.5	55.5	1	20.3	70	0	12	2003	Sunday	Winter	0	0	0	0	0	0	0	0
2003-12-22	41	94	1.5	18	47.5	1	20.3	71	0	12	2003	Monday	Winter	1	0	0	0	0	0	0	0
2003-12-23	34	89	1.5	21.5	76.5	1	21.9	69	0	12	2003	Tuesday	Winter	0	1	0	0	0	0	0	0
2003-12-24	35	98.5	2	21	80	1	21.8	70	0	12	2003	Wednesday	Winter	0	0	1	0	0	0	0	0
2003-12-25	29	77.5	1.5	21	65.5	1	22.4	69	0	12	2003	Thursday	Winter	0	0	0	1	0	0	0	0
2003-12-26	44	100	2	28	60	1	22.9	68	0	12	2003	Friday	Winter	0	0	0	0	1	0	0	0
2003-12-27	28	115	3	30	42	1	23.3	64	0	12	2003	Saturday	Winter	0	0	0	0	0	1	0	0
2003-12-28	29	139	3	25	73	1	21.1	67	0	12	2003	Sunday	Winter	0	0	0	0	0	0	0	0
2003-12-29	26	149	2	29	53	1	20	69	0	12	2003	Monday	Winter	1	0	0	0	0	0	0	0
2003-12-30	34	137	2	31	69	1	20.1	69	0	12	2003	Tuesday	Winter	0	1	0	0	0	0	0	0
2003-12-31	11	88	1.5	23	63.5	1	20.1	68	0	12	2003	Wednesday	Winter	0	0	1	0	0	0	0	0
2004-01-01	43	105	1.5	25.5	77.5	1	20.4	67	0	1	2004	Thursday	Winter	0	0	0	1	0	0	0	0
2004-01-02	55	99.5	1.5	23	67	1	20.5	68	0	1	2004	Friday	Winter	0	0	0	0	1	0	0	0
2004-01-03	37	91	1.5	23	71.5	1	20.5	70	0	1	2004	Saturday	Winter	0	0	0	0	0	1	0	0
2004-01-04	41	105	1.5	23.5	70.5	1	21.1	70	0	1	2004	Sunday	Winter	0	0	0	0	0	0	0	0
2004-01-05	50	121	1.5	27.5	75	1	21.2	70	0	1	2004	Monday	Winter	1	0	0	0	0	0	0	0
2004-01-06	36	138	2	30	60	1	21.1	71	0	1	2004	Tuesday	Winter	0	1	0	0	0	0	0	0
2004-01-07	39	146	2	31	67	1	20.8	72	0	1	2004	Wednesday	Winter	0	0	1	0	0	0	0	0
2004-01-08	35	120	3	29	68.5	1	21.2	67	0	1	2004	Thursday	Winter	0	0	0	1	0	0	0	0
2004-01-09	45	128.5	3	30	61	1	20.8	72	0	1	2004	Friday	Winter	0	0	0	0	1	0	0	0
2004-01-10	27	109	1.5	25	62.5	1	21.6	71	0	1	2004	Saturday	Winter	0	0	0	0	0	1	0	0
2004-01-11	29	92.5	1.5	20	61	1	22	70	0	1	2004	Sunday	Winter	0	0	0	0	0	0	0	0
2004-01-12	46	114	1.5	17	58	1	22.3	77	9.95	1	2004	Monday	Winter	1	0	0	0	0	0	0	0
2004-01-13	39	79	1	13	45.5	1	21.9	81	0	1	2004	Tuesday	Winter	0	1	0	0	0	0	0	0
2004-01-14	32	81	1.5	14.5	41	1	22.5	74	0	1	2004	Wednesday	Winter	0	0	1	0	0	0	0	0
2004-01-15	43	84	1.5	16.5	57	0.5	22.1	68	0	1	2004	Thursday	Winter	0	0	0	1	0	0	0	0
2004-01-16	35	68	1	15	48.5	0.5	21.1	65	0	1	2004	Friday	Winter	0	0	0	0	1	0	0	0
2004-01-17	43	88	1.5	18	62	0.5	20.5	63	0	1	2004	Saturday	Winter	0	0	0	0	0	1	0	0
2004-01-18	37	96	1	16	63.5	0.5	21	65	0	1	2004	Sunday	Winter	0	0	0	0	0	0	0	0
2004-01-19	34	104	1.5	20	60	1	20.3	61	0	1	2004	Monday	Winter	1	0	0	0	0	0	0	0
2004-01-20	45	76	1	21	71.5	1	20.2	58	0	1	2004	Tuesday	Winter	0	1	0	0	0	0	0	0
2004-01-21	36	92.5	2.5	23	54	1	20.1	60	0	1	2004	Wednesday	Winter	0	0	1	0	0	0	0	0
2004-01-22	26	136	2	23.5	51	1.5	21.3	68	0	1	2004	Thursday	Winter	0	0	0	1	0	0	0	0
2004-01-23	41	106	2.5	21	54.5	1	20.9	64	0	1	2004	Friday	Winter	0	0	0	0	1	0	0	0
2004-01-24	33	120	2	17	66.5	1	22.2	64	0	1	2004	Saturday	Winter	0	0	0	0	0	1	0	0
2004-01-25	43	110	2	13	65.5	1	23.3	59	0	1	2004	Sunday	Winter	0	0	0	0	0	0	0	0
2004-01-26	46	169	3	25	67	1	22.6	60	0	1	2004	Monday	Winter	1	0	0	0	0	0	0	0
2004-01-27	42	153	2	23.5	67.5	1	22.7	65	0	1	2004	Tuesday	Winter	0	1	0	0	0	0	0	0
2004-01-28	32	156	1.5	25	50.5	1	24	62	0	1	2004	Wednesday	Winter	0	0	1	0	0	0	0	0
2004-01-29	33	96	1.5	21	60	1	22.6	60	0	1	2004	Thursday	Winter	0	0	0	1	0	0	0	0
2004-01-30	41	114	1	24.5	70.5	1	22.4	57	0	1	2004	Friday	Winter	0	0	0	0	1	0	0	0
2004-01-31	46	96.5	0	23.5	67	1	22.8	61	0	1	2004	Saturday	Winter	0	0	0	0	0	1	0	0
2004-02-01	51	91	1	22	82	1	23.2	56	0	2	2004	Sunday	Winter	0	0	0	0	0	0	0	0
2004-02-02	35	103	2	24.5	73.5	1	23.1	56	0	2	2004	Monday	Winter	1	0	0	0	0	0	0	0
2004-02-03	34	126	2.5	26	83.5	1	24.6	53	0	2	2004	Tuesday	Winter	0	1	0	0	0	0	0	0
2004-02-04	44	100.5	2.5	19	58	1	27.7	45	0	2	2004	Wednesday	Winter	0	0	1	0	0	0	0	0
2004-02-05	36	146	3	25.5	80.5	1	24	54	0	2	2004	Thursday	Winter	0	0	0	1	0	0	0	0
2004-02-06	51	145	3.5	18.5	50	1	25.4	57	0	2	2004	Friday	Winter	0	0	0	0	1	0	0	0
2004-02-07	33	75	1.5	11.5	38.5	1	24.4	70	0	2	2004	Saturday	Winter	0	0	0	0	0	1	0	0
2004-02-08	47	68	0.5	11	58.5	1	24.4	66	4.9	2	2004	Sunday	Winter	0	0	0	0	0	0	0	0
2004-02-09	38	66	1	14.5	57	1	23.1	69	0	2	2004	Monday	Winter	1	0	0	0	0	0	0	0
2004-02-10	35	91	2.5	19	59	1	22.3	68	0	2	2004	Tuesday	Winter	0	1	0	0	0	0	0	0
2004-02-11	44	106.5	2.5	23	54.5	1	22.9	65	0	2	2004	Wednesday	Winter	0	0	1	0	0	0	0	0
2004-02-12	40	128.5	3.5	25	72	1	23.6	61	0	2	2004	Thursday	Winter	0	0	0	1	0	0	0	0
2004-02-13	33	144.5	4	19.5	77	0.5	23.7	62	0	2	2004	Friday	Winter	0	0	0	0	1	0	0	0
2004-02-14	37	92.5	1.5	16.5	55	0.5	22.9	63	0	2	2004	Saturday	Winter	0	0	0	0	0	1	0	0
2004-02-15	36	136.5	3	21.5	69	0.5	23.6	62	0	2	2004	Sunday	Summer	0	0	0	0	0	0	0	1
2004-02-16	45	169	3	24	76	1.5	23.7	59	0	2	2004	Monday	Summer	1	0	0	0	0	0	0	1
2004-02-17	36	182.5	4	31		1.5	23.9	57	0	2	2004	Tuesday	Summer	0	1	0	0	0	0	0	1
2004-02-18	24	170	3.5	37	87.5	1	23.5	56	0	2	2004	Wednesday	Summer	0	0	1	0	0	0	0	1
2004-02-19	39	165.5	3.5	37	69	1	24.5	53	0	2	2004	Thursday	Summer	0	0	0	1	0	0	0	1
2004-02-20	40	159.5	3.5	35	79	0.5	23.8	54	0	2	2004	Friday	Summer	0	0	0	0	1	0	0	1
2004-02-21	39	133.5	3	31	68.5	0.5	24.6	54	0	2	2004	Saturday	Summer	0	0	0	0	0	1	0	1
2004-02-22	35	142.5	4	31	75.5	1	24.3	55	0	2	2004	Sunday	Summer	0	0	0	0	0	0	0	1
2004-02-23	37	118.5	3	27	60	0.5	25.1	50	0	2	2004	Monday	Summer	1	0	0	0	0	0	0	1
2004-02-24	29	108	3	31	68.5	0.5	24.3	49	0	2	2004	Tuesday	Summer	0	1	0	0	0	0	0	1
2004-02-25	39	164	4	36	73.5	1.5	23	50	0	2	2004	Wednesday	Summer	0	0	1	0	0	0	0	1
2004-02-26	38	229.5	5	46	90.5	2	23.9	48	0	2	2004	Thursday	Summer	0	0	0	1	0	0	0	1
2004-02-27	25	247.5	4	34	94.5	1.5	23.6	51	0	2	2004	Friday	Summer	0	0	0	0	1	0	0	1
2004-02-28	38	208.5	4	29.5	74	1	24.3	54	0	2	2004	Saturday	Summer	0	0	0	0	0	1	0	1
2004-02-29	27	123	3	25.5	63	1	23.5	52	0	2	2004	Sunday	Summer	0	0	0	0	0	0	0	1
2004-03-01	49	152.5	3	28.5	69.5	1	24.4	50	0	3	2004	Monday	Summer	1	0	0	0	0	0	0	1
2004-03-02	47	154	3	28.5	74	1	24.4	52	0	3	2004	Tuesday	Summer	0	1	0	0	0	0	0	1
2004-03-03	47	201.5	4	30.5	90	1	25.4	51	0	3	2004	Wednesday	Summer	0	0	1	0	0	0	0	1
2004-03-04	25	167.5	4	26.5	47	1	26.5	45	0	3	2004	Thursday	Summer	0	0	0	1	0	0	0	1
2004-03-05	37	153.5	4.5	24	60	1	25.6	42	0	3	2004	Friday	Summer	0	0	0	0	1	0	0	1
2004-03-06	36	180.5	3.5	25.5	64.5	1	25.2	48	0	3	2004	Saturday	Summer	0	0	0	0	0	1	0	1
2004-03-07	37	183	3	19.5	58.5	1	27.2	57	0	3	2004	Sunday	Summer	0	0	0	0	0	0	0	1
2004-03-08	39	122	1.5	15.5	56.5	1	27.2	49	0	3	2004	Monday	Summer	1	0	0	0	0	0	0	1
2004-03-09	35	152	1.5	19.5	69.5	0.5	25.9	51	0	3	2004	Tuesday	Summer	0	1	0	0	0	0	0	1
2004-03-10	50	207.5	3	29	98	1	25.5	54	0	3	2004	Wednesday	Summer	0	0	1	0	0	0	0	1
2004-03-11	42	202.5	3	25	84.5	1	27.6	48	0	3	2004	Thursday	Summer	0	0	0	1	0	0	0	1
2004-03-12	38	182	3	29	82	1	28.3	50	0	3	2004	Friday	Summer	0	0	0	0	1	0	0	1
2004-03-13	42	164.5	3	26	83.5	1	29	51	0	3	2004	Saturday	Summer	0	0	0	0	0	1	0	1
2004-03-14	40	190	3.5	23	103.5	1	29.1	50	0	3	2004	Sunday	Summer	0	0	0	0	0	0	0	1
2004-03-15	38	181.5	2.5	18.5	58.5	1	29.7	54	0	3	2004	Monday	Summer	1	0	0	0	0	0	0	1
2004-03-16	50	124.5	1.5	17	50.5	0	29.2	58	0	3	2004	Tuesday	Summer	0	1	0	0	0	0	0	1
2004-03-17	50	121.5	1.5	17	51.5	0	28.9	47	0	3	2004	Wednesday	Summer	0	0	1	0	0	0	0	1
2004-03-18	38	209.5	3.5	30.5	82.5	1	27.8	45	0	3	2004	Thursday	Summer	0	0	0	1	0	0	0	1
2004-03-19	28	201.5	3.5	26	80	1	28.8	46	0	3	2004	Friday	Summer	0	0	0	0	1	0	0	1
2004-03-20	35	181	2	21.5	75	0.5	29.6	42	0	3	2004	Saturday	Summer	0	0	0	0	0	1	0	1
2004-03-21	39	175.5	2	20.5	79.5	1	29.5	40	0	3	2004	Sunday	Summer	0	0	0	0	0	0	0	1
2004-03-22	51	210	3.5	26	72.5	1	29.1	39	0	3	2004	Monday	Summer	1	0	0	0	0	0	0	1
2004-03-23	24	221	2.5	22	72	1	29	40	0	3	2004	Tuesday	Summer	0	1	0	0	0	0	0	1
2004-03-24	37	211.5	2.5	23	78	1	28.4	46	0	3	2004	Wednesday	Summer	0	0	1	0	0	0	0	1
2004-03-25	46	215.5	3	24.5	81.5	1	28.6	48	0	3	2004	Thursday	Summer	0	0	0	1	0	0	0	1
2004-03-26	48	228	2.5	24.5	71.5	1	29.2	49	0	3	2004	Friday	Summer	0	0	0	0	1	0	0	1
2004-03-27	47	238.5	4	25	75.5	1	30	47	0	3	2004	Saturday	Summer	0	0	0	0	0	1	0	1
2004-03-28	38	198	2.5	21.5	78.5	1	29.7	42	0	3	2004	Sunday	Summer	0	0	0	0	0	0	0	1
2004-03-29	44	217	5	35	85	1.5	29.2	44	0	3	2004	Monday	Summer	1	0	0	0	0	0	0	1
2004-03-30	38	218	5.5	31	89	1	30.2	45	0	3	2004	Tuesday	Summer	0	1	0	0	0	0	0	1
2004-03-31	42	173	4	32	84	1	29.4	43	0	3	2004	Wednesday	Summer	0	0	1	0	0	0	0	1
2004-04-01	39	190	1	27	47	1	28.7	51	0	4	2004	Thursday	Summer	0	0	0	1	0	0	0	1
2004-04-02	36	117.5	1.5	15.5	68	0.5	28.2	58	0	4	2004	Friday	Summer	0	0	0	0	1	0	0	1
2004-04-03	42	130.5	5	38	70.5	1	29.6	53	0	4	2004	Saturday	Summer	0	0	0	0	0	1	0	1
2004-04-04	33	116	2	18.5	59	1	28.3	60	4.55	4	2004	Sunday	Summer	0	0	0	0	0	0	0	1
2004-04-05	30	105.5	2	24	60	1	26.4	69	0	4	2004	Monday	Summer	1	0	0	0	0	0	0	1
2004-04-06	35	102.5	2	24.5	65	1	28.2	59	14	4	2004	Tuesday	Summer	0	1	0	0	0	0	0	1
2004-04-07	31	122	2.5	25.5	68.5	1	29.6	53	0	4	2004	Wednesday	Summer	0	0	1	0	0	0	0	1
2004-04-08	32	84.5	1	13.5	67.5	1	30.4	50	0.45	4	2004	Thursday	Summer	0	0	0	1	0	0	0	1
2004-04-09	32	84	2.5	25	61.5	1	29.4	54	1.75	4	2004	Friday	Summer	0	0	0	0	1	0	0	1
2004-04-10	35	79	3	20.5	55.5	0	30.2	48	0	4	2004	Saturday	Summer	0	0	0	0	0	1	0	1
2004-04-11	46	101.5	3	24	72.5	0.5	31.3	43	0	4	2004	Sunday	Summer	0	0	0	0	0	0	0	1
2004-04-12	29	112.5	3	29	54.5	0.5	31.1	46	0	4	2004	Monday	Summer	1	0	0	0	0	0	0	1
2004-04-13	49	122	3	27.5	74.5	0.5	31.8	44	0	4	2004	Tuesday	Summer	0	1	0	0	0	0	0	1
2004-04-14	45	99	2	21	63.5	0.5	32	41	0	4	2004	Wednesday	Summer	0	0	1	0	0	0	0	1
2004-04-15	42	91.5	2	15	55	0.5	31.4	44	0	4	2004	Thursday	Summer	0	0	0	1	0	0	0	1
2004-04-16	51	70	1.5	10.5	40	0	31.8	46	0	4	2004	Friday	Summer	0	0	0	0	1	0	0	1
2004-04-17	42	56	2	9.5	48.5	0	32.2	45	0	4	2004	Saturday	Summer	0	0	0	0	0	1	0	1
2004-04-18	53	61	1.5	13	48	0	31.2	51	1.65	4	2004	Sunday	Summer	0	0	0	0	0	0	0	1
2004-04-19	37	47	2	14.5	79.5	0	29.2	54	0	4	2004	Monday	Summer	1	0	0	0	0	0	0	1
2004-04-20	37	49.5	2	16.5	63	0	29	62	2.1	4	2004	Tuesday	Summer	0	1	0	0	0	0	0	1
2004-04-21	41	77	1	22.5	72.5	0.5	30.2	53	0	4	2004	Wednesday	Summer	0	0	1	0	0	0	0	1
2004-04-22	40	117.5	2	21	93.5	0.5	31.7	44	0	4	2004	Thursday	Summer	0	0	0	1	0	0	0	1
2004-04-23	37	124	2.5	27	75.5	0.5	31.7	42	0	4	2004	Friday	Summer	0	0	0	0	1	0	0	1
2004-04-24	38	115	2	20.5	79.5	0.5	32.5	42	0	4	2004	Saturday	Summer	0	0	0	0	0	1	0	1
2004-04-25	40	115.5	1	24	79	0.5	31.3	47	0	4	2004	Sunday	Summer	0	0	0	0	0	0	0	1
2004-04-26	48	102.5	3.5	22	75.5	0.5	32.8	44	0	4	2004	Monday	Summer	1	0	0	0	0	0	0	1
2004-04-27	35	80	2.5	16	81	0.5	31.5	50	0	4	2004	Tuesday	Summer	0	1	0	0	0	0	0	1
2004-04-28	35	37.5	1	11	66	0.5	28.4	67	1.1	4	2004	Wednesday	Summer	0	0	1	0	0	0	0	1
2004-04-29	31	40	1	14	71.5	0.5	28	70	0	4	2004	Thursday	Summer	0	0	0	1	0	0	0	1
2004-04-30	32	40.5	1.5	13.5	73.5	0	30.2	62	0.1	4	2004	Friday	Summer	0	0	0	0	1	0	0	1
2004-05-01	37	29	0.5	8.5	63.5	0	31.5	55	9.5	5	2004	Saturday	Summer	0	0	0	0	0	1	0	1
2004-05-02	39	33.5	0.5	12	58.5	0	29.3	69	21.55	5	2004	Sunday	Summer	0	0	0	0	0	0	0	1
2004-05-03	39	37	1.5	12.5	77.5	0	28.7	75	11.35	5	2004	Monday	Summer	1	0	0	0	0	0	0	1
2004-05-04	36	33	2	15.5	81.5	0	28.2	76	0	5	2004	Tuesday	Summer	0	1	0	0	0	0	0	1
2004-05-05	39	28.5	2	13	59.5	0	27.7	78	93.45	5	2004	Wednesday	Summer	0	0	1	0	0	0	0	1
2004-05-06	31	24.5	2.5	12	45.5	0	26.3	85	1.95	5	2004	Thursday	Summer	0	0	0	1	0	0	0	1
2004-05-07	31	22.5	2	12	26	0	25.9	87	6.8	5	2004	Friday	Summer	0	0	0	0	1	0	0	1
2004-05-08	29	27	1.5	8	54	0	28.6	74	0	5	2004	Saturday	Summer	0	0	0	0	0	1	0	1
2004-05-09	43	30	2.5	10	49.5	0	30.2	63	0	5	2004	Sunday	Summer	0	0	0	0	0	0	0	1
2004-05-10	40	23	1	10.5	43.5	0	30.1	67	0	5	2004	Monday	Summer	1	0	0	0	0	0	0	1
2004-05-11	22	20	2.5	8.5	30	0	28	76	0	5	2004	Tuesday	Summer	0	1	0	0	0	0	0	1
2004-05-12	17	23.5	1.5	10.5	39.5	0	28.4	74	0	5	2004	Wednesday	Summer	0	0	1	0	0	0	0	1
2004-05-13	25	23	0.5	9.5	41	0	29.5	69	2.8	5	2004	Thursday	Summer	0	0	0	1	0	0	0	1
2004-05-14	43	19.5	0	9	25.5	0	29.1	74	0	5	2004	Friday	Summer	0	0	0	0	1	0	0	1
2004-05-15	28	16.5	0.5	7.5	29.5	0	29.2	70	3.8	5	2004	Saturday	Rainy	0	0	0	0	0	1	1	0
2004-05-16	32	17	0.5	8	30.5	0	28.8	74	1.7	5	2004	Sunday	Rainy	0	0	0	0	0	0	1	0
2004-05-17	27	17.5	0.5	8.5	29	0	27.4	81	2.25	5	2004	Monday	Rainy	1	0	0	0	0	0	1	0
2004-05-18	48	17.5	0.5	9	25.5	0	26.8	80	0	5	2004	Tuesday	Rainy	0	1	0	0	0	0	1	0
2004-05-19	34	19.5	0.5	10.5	16	0	25.3	91	7.7	5	2004	Wednesday	Rainy	0	0	1	0	0	0	1	0
2004-05-20	36	27.5	1.5	18.5	22	0.5	23.9	97	14.05	5	2004	Thursday	Rainy	0	0	0	1	0	0	1	0
2004-05-21	35	42	2	16	29	0	25.2	90	11.45	5	2004	Friday	Rainy	0	0	0	0	1	0	1	0
2004-05-22	53	42.5	1.5	16	52.5	0	26.1	83	0	5	2004	Saturday	Rainy	0	0	0	0	0	1	1	0
2004-05-23	31	33	1	13	43	0	27.9	72	0.05	5	2004	Sunday	Rainy	0	0	0	0	0	0	1	0
2004-05-24	31	40.5	2.5	16	47.5	0	28.5	71	0	5	2004	Monday	Rainy	1	0	0	0	0	0	1	0
2004-05-25	45	36	2.5	13	56.5	0	28.6	73	0.95	5	2004	Tuesday	Rainy	0	1	0	0	0	0	1	0
2004-05-26	36	25.5	2	11.5	36.5	0	28.4	77	1.3	5	2004	Wednesday	Rainy	0	0	1	0	0	0	1	0
2004-05-27	31	23.5	1.5	12.5	28.5	0	27	83	2.05	5	2004	Thursday	Rainy	0	0	0	1	0	0	1	0
2004-05-28	31	23	1	10	19	0	26.2	87	3.8	5	2004	Friday	Rainy	0	0	0	0	1	0	1	0
2004-05-29	31	28.5	2	13.5	27	0	26.5	87	1.65	5	2004	Saturday	Rainy	0	0	0	0	0	1	1	0
2004-05-30	33	28.5	2	10	31	0	26.7	84	3	5	2004	Sunday	Rainy	0	0	0	0	0	0	1	0
2004-05-31	22	28	2	14	20	0	25.6	92	10.25	5	2004	Monday	Rainy	1	0	0	0	0	0	1	0
2004-06-01	29	28	1.5	10.5	19	0	26.2	88	1.25	6	2004	Tuesday	Rainy	0	1	0	0	0	0	1	0
2004-06-02	36	25	1	9	31	0	27.6	78	0	6	2004	Wednesday	Rainy	0	0	1	0	0	0	1	0
2004-06-03	29	26.5	1	9.5	34.5	0	28.2	75	0	6	2004	Thursday	Rainy	0	0	0	1	0	0	1	0
2004-06-04	32	31.5	1.5	10.5	42	0.5	28.6	72	0	6	2004	Friday	Rainy	0	0	0	0	1	0	1	0
2004-06-05	40	26	2.5	8	53.5	0.5	29.6	69	0	6	2004	Saturday	Rainy	0	0	0	0	0	1	1	0
2004-06-06	32	29	0.5	10	48.5	0.5	28.6	71	1	6	2004	Sunday	Rainy	0	0	0	0	0	0	1	0
2004-06-07	29	29.5	1.5	11	25	0	26.9	83	1.6	6	2004	Monday	Rainy	1	0	0	0	0	0	1	0
2004-06-08	33	32.5	2.5	13.5	37.5	0	26.3	89	3.75	6	2004	Tuesday	Rainy	0	1	0	0	0	0	1	0
2004-06-09	36	33.5	2	15	58	0	26.3	88	6.05	6	2004	Wednesday	Rainy	0	0	1	0	0	0	1	0
2004-06-10	32	30	1.5	12	32	0	26.6	86	26.65	6	2004	Thursday	Rainy	0	0	0	1	0	0	1	0
2004-06-11	17	29.5	2	13.5	30	0	25.9	91	7.75	6	2004	Friday	Rainy	0	0	0	0	1	0	1	0
2004-06-12	37	25	0	12	28.5	0.5	24.9	95	11.45	6	2004	Saturday	Rainy	0	0	0	0	0	1	1	0
2004-06-13	27	31	0	11	58	0.5	27.6	80	0.3	6	2004	Sunday	Rainy	0	0	0	0	0	0	1	0
2004-06-14	42	44	1.5	15.5	49	0	27.1	87	30.65	6	2004	Monday	Rainy	1	0	0	0	0	0	1	0
2004-06-15	27	30	1	13	45	0.5	25.5	94	22.9	6	2004	Tuesday	Rainy	0	1	0	0	0	0	1	0
2004-06-16	43	29	1	10.5	19.5	0.5	25.9	91	1.85	6	2004	Wednesday	Rainy	0	0	1	0	0	0	1	0
2004-06-17	38	20.5	1.5	11	18	0.5	25.5	91	6.3	6	2004	Thursday	Rainy	0	0	0	1	0	0	1	0
2004-06-18	28	22	2	8.5	24	0	26.2	83	3.45	6	2004	Friday	Rainy	0	0	0	0	1	0	1	0
2004-06-19	30	30.5	1.5	11	26	0	25.9	82	0.4	6	2004	Saturday	Rainy	0	0	0	0	0	1	1	0
2004-06-20	35	28.5	2	8	25.5	0	26.7	80	0.7	6	2004	Sunday	Rainy	0	0	0	0	0	0	1	0
2004-06-21	42	27.5	1.5	11	21.5	0	26.5	79	0.3	6	2004	Monday	Rainy	1	0	0	0	0	0	1	0
2004-06-22	36	38.5	1.5	11.5	31.5	0	26.6	81	2.35	6	2004	Tuesday	Rainy	0	1	0	0	0	0	1	0
2004-06-23	32	32	1	10	34	0	26.3	84	0	6	2004	Wednesday	Rainy	0	0	1	0	0	0	1	0
2004-06-24	38	29	1.5	11.5	37	0	27.3	77	0	6	2004	Thursday	Rainy	0	0	0	1	0	0	1	0
2004-06-25	37	33.5	1.5	12	45	0	26.8	77	0	6	2004	Friday	Rainy	0	0	0	0	1	0	1	0
2004-06-26	40	46	1.5	11.5	50	0	27.6	77	0	6	2004	Saturday	Rainy	0	0	0	0	0	1	1	0
2004-06-27	35	32	1	10	41	0	26.7	83	5.45	6	2004	Sunday	Rainy	0	0	0	0	0	0	1	0
2004-06-28	39	24	1.5	13	27.5	0	25.3	92	18.05	6	2004	Monday	Rainy	1	0	0	0	0	0	1	0
2004-06-29	32	30	1.5	16	23	0.5	24.5	96	4.85	6	2004	Tuesday	Rainy	0	1	0	0	0	0	1	0
2004-06-30	33	42	0.5	13	35	0.5	26.9	86	0.35	6	2004	Wednesday	Rainy	0	0	1	0	0	0	1	0
2004-07-01	42	23.5	3	11.5	42.5	0	27.7	80	0.05	7	2004	Thursday	Rainy	0	0	0	1	0	0	1	0
2004-07-02	46	18	1.5	11	27	0	27.8	80	0	7	2004	Friday	Rainy	0	0	0	0	1	0	1	0
2004-07-03	30	18	1.5	10	40.5	0	27.5	79	3.35	7	2004	Saturday	Rainy	0	0	0	0	0	1	1	0
2004-07-04	37	15.5	4.5	6.5	47	0	26.3	86	0.05	7	2004	Sunday	Rainy	0	0	0	0	0	0	1	0
2004-07-05	39	20.5	3	7.5	26.5	0	27.4	80	1.45	7	2004	Monday	Rainy	1	0	0	0	0	0	1	0
2004-07-06	32	16	2.5	4	26	0.5	24.9	93	9.3	7	2004	Tuesday	Rainy	0	1	0	0	0	0	1	0
2004-07-07	33	19.5	1	13	34	0	25.5	89	0.85	7	2004	Wednesday	Rainy	0	0	1	0	0	0	1	0
2004-07-08	33	19	1.5	12	23	0	25.4	86	5.65	7	2004	Thursday	Rainy	0	0	0	1	0	0	1	0
2004-07-09	33	15.5	1.5	11.5	25	0	25.6	87	5.4	7	2004	Friday	Rainy	0	0	0	0	1	0	1	0
2004-07-10	45	16	2	12	22.5	0	24.8	90	2.15	7	2004	Saturday	Rainy	0	0	0	0	0	1	1	0
2004-07-11	28	15	2	10	25	0	25	90	32.25	7	2004	Sunday	Rainy	0	0	0	0	0	0	1	0
2004-07-12	30	15	1.5	9	19.5	0	25.1	89	8.35	7	2004	Monday	Rainy	1	0	0	0	0	0	1	0
2004-07-13	30		2	10.5	16.5	0	25.1	92	18.25	7	2004	Tuesday	Rainy	0	1	0	0	0	0	1	0
2004-07-14	41	19	1	9.5	18.5	0	25.6	85	0.95	7	2004	Wednesday	Rainy	0	0	1	0	0	0	1	0
2004-07-15	40	21.5	1	11	21.5	0	26.9	77	0	7	2004	Thursday	Rainy	0	0	0	1	0	0	1	0
2004-07-16	27	20.5	2	13.5	39	0	27.4	78	0	7	2004	Friday	Rainy	0	0	0	0	1	0	1	0
2004-07-17	38	21.5	2.5	13	42	0	28	77	0.5	7	2004	Saturday	Rainy	0	0	0	0	0	1	1	0
2004-07-18	41	23	3	10	37.5	0	28.5	74	0	7	2004	Sunday	Rainy	0	0	0	0	0	0	1	0
2004-07-19	32	23.5	3.5	11	30	0	28.4	72	0	7	2004	Monday	Rainy	1	0	0	0	0	0	1	0
2004-07-20	43	18	2.5	11	23	0.5	28.2	75	11.55	7	2004	Tuesday	Rainy	0	1	0	0	0	0	1	0
2004-07-21	44	16	3	10.5	38	0.5	26.3	86	5.25	7	2004	Wednesday	Rainy	0	0	1	0	0	0	1	0
2004-07-22	33	15	1.5	10	33.5	0	25.7	90	12.35	7	2004	Thursday	Rainy	0	0	0	1	0	0	1	0
2004-07-23	31	14.5	1.5	12.5	15	0.5	23.9	97	6.15	7	2004	Friday	Rainy	0	0	0	0	1	0	1	0
2004-07-24	27	17	0.5	10.5	34	0	25.4	91	13.3	7	2004	Saturday	Rainy	0	0	0	0	0	1	1	0
2004-07-25	31	18	0.5	9.5	32.5	0	25.3	93	27.15	7	2004	Sunday	Rainy	0	0	0	0	0	0	1	0
2004-07-26	33	19	0.5	9.5	30	0	25.3	91	3.35	7	2004	Monday	Rainy	1	0	0	0	0	0	1	0
2004-07-27	33	22	1	15.5	30.5	0	24.7	95	21.25	7	2004	Tuesday	Rainy	0	1	0	0	0	0	1	0
2004-07-28	20	20.5	2.5	12.5	37.5	0	26.1	87	16.95	7	2004	Wednesday	Rainy	0	0	1	0	0	0	1	0
2004-07-29	33	26	2	12	36	0	26.7	83	2.9	7	2004	Thursday	Rainy	0	0	0	1	0	0	1	0
2004-07-30	34	22	1	11	43.5	0	26	91	1.25	7	2004	Friday	Rainy	0	0	0	0	1	0	1	0
2004-07-31	32	17.5	1.5	8.5	24	0	25.9	90	22.95	7	2004	Saturday	Rainy	0	0	0	0	0	1	1	0
2004-08-01	36	16.5	1	8	24.5	0	25.5	91	28.8	8	2004	Sunday	Rainy	0	0	0	0	0	0	1	0
2004-08-02	39	20	1	8.5	27	0	25.3	93	3.95	8	2004	Monday	Rainy	1	0	0	0	0	0	1	0
2004-08-03	34	23	1.5	8.5	21	0	25.8	87	2.7	8	2004	Tuesday	Rainy	0	1	0	0	0	0	1	0
2004-08-04	36	21	0	10.5	32	0	24.7	93	19.5	8	2004	Wednesday	Rainy	0	0	1	0	0	0	1	0
2004-08-05	46	36	0	17	27	0.5	24.9	90	0.5	8	2004	Thursday	Rainy	0	0	0	1	0	0	1	0
2004-08-06	37	24	2.5	20	22	0	25.8	89	7.65	8	2004	Friday	Rainy	0	0	0	0	1	0	1	0
2004-08-07	36	21	2	10.5	26.5	0	26.7	83	0	8	2004	Saturday	Rainy	0	0	0	0	0	1	1	0
2004-08-08	28	18.5	1	10.5	26.5	0	26.7	85	7.2	8	2004	Sunday	Rainy	0	0	0	0	0	0	1	0
2004-08-09	36	23.5	1.5	11.5	24.5	0	26.5	85	4.35	8	2004	Monday	Rainy	1	0	0	0	0	0	1	0
2004-08-10	29	23	1.5	14	37.5	0	25.1	91	10	8	2004	Tuesday	Rainy	0	1	0	0	0	0	1	0
2004-08-11	37	20	2.5	13	32	0.5	25.8	85	4.3	8	2004	Wednesday	Rainy	0	0	1	0	0	0	1	0
2004-08-12	31	20	1.5	10.5	35.5	0	25.8	87	1.15	8	2004	Thursday	Rainy	0	0	0	1	0	0	1	0
2004-08-13	20	29	2	14	33	0	26.3	84	0.05	8	2004	Friday	Rainy	0	0	0	0	1	0	1	0
2004-08-14	25	26	3.5	16	35	0	26.7	82	1	8	2004	Saturday	Rainy	0	0	0	0	0	1	1	0
2004-08-15	30	21	2.5	11	24	0	26.1	86	4.2	8	2004	Sunday	Rainy	0	0	0	0	0	0	1	0
2004-08-16	30	28	2	11	33	0	26.5	85	1.25	8	2004	Monday	Rainy	1	0	0	0	0	0	1	0
2004-08-17	24	23	2	9.5	34	0	27.3	81	0.1	8	2004	Tuesday	Rainy	0	1	0	0	0	0	1	0
2004-08-18	36	29	2.5	13	41.5	0	27	82	2.3	8	2004	Wednesday	Rainy	0	0	1	0	0	0	1	0
2004-08-19	40	26	0.5	8	32.5	0	26.6	85	2.3	8	2004	Thursday	Rainy	0	0	0	1	0	0	1	0
2004-08-20	44	27	0	10	34.5	0	26.5	87	11.05	8	2004	Friday	Rainy	0	0	0	0	1	0	1	0
2004-08-21	40	24.5	0	11	56.5	0	27.4	82	0	8	2004	Saturday	Rainy	0	0	0	0	0	1	1	0
2004-08-22	27	25	0	10	41.5	0.5	27.9	83	0	8	2004	Sunday	Rainy	0	0	0	0	0	0	1	0
2004-08-23	34	24.5	0	9	44.5	0	28.7	79	0	8	2004	Monday	Rainy	1	0	0	0	0	0	1	0
2004-08-24	33	30.5	0.5	9.5	39	0	27.8	81	0	8	2004	Tuesday	Rainy	0	1	0	0	0	0	1	0
2004-08-25	37	24.5	2	9	33	0	28.5	75	0	8	2004	Wednesday	Rainy	0	0	1	0	0	0	1	0
2004-08-26	31	27	1	10.5	30.5	0	28.4	74	0	8	2004	Thursday	Rainy	0	0	0	1	0	0	1	0
2004-08-27	41	29.5	1	11	26.5	0	27.8	76	0	8	2004	Friday	Rainy	0	0	0	0	1	0	1	0
2004-08-28	27	33	0.5	12	41.5	0	27	82	14.75	8	2004	Saturday	Rainy	0	0	0	0	0	1	1	0
2004-08-29	38	38	0.5	11.5	37	0	27.3	81	0.3	8	2004	Sunday	Rainy	0	0	0	0	0	0	1	0
2004-08-30	38	41.5	0.5	13.5	29.5	1	26.4	86	8.1	8	2004	Monday	Rainy	1	0	0	0	0	0	1	0
2004-08-31	39	45.5	0.5	15	41	1	26.6	86	0.2	8	2004	Tuesday	Rainy	0	1	0	0	0	0	1	0
2004-09-01	21	34	1.5	11.5	40	0.5	27.1	85	0	9	2004	Wednesday	Rainy	0	0	1	0	0	0	1	0
2004-09-02	26	37	2	11.5	26	1	27.4	85	9.65	9	2004	Thursday	Rainy	0	0	0	1	0	0	1	0
2004-09-03	28	25.5	0.5	9.5	25.5	0	26.1	88	9.6	9	2004	Friday	Rainy	0	0	0	0	1	0	1	0
2004-09-04	25	28.5	0.5	9.5	29.5	0	25	94	6.2	9	2004	Saturday	Rainy	0	0	0	0	0	1	1	0
2004-09-05	26	25.5	0.5	6.5	28.5	0	27.7	78	0	9	2004	Sunday	Rainy	0	0	0	0	0	0	1	0
2004-09-06	41	30	0.5	8	39	0	27.3	79	2.95	9	2004	Monday	Rainy	1	0	0	0	0	0	1	0
2004-09-07	31	30	1	8	32	0	26.8	81	0	9	2004	Tuesday	Rainy	0	1	0	0	0	0	1	0
2004-09-08	30	30	1.5	10	36.5	0.5	26	87	12.9	9	2004	Wednesday	Rainy	0	0	1	0	0	0	1	0
2004-09-09	24	18	1	9.5	21.5	0.5	25.3	91	110.15	9	2004	Thursday	Rainy	0	0	0	1	0	0	1	0
2004-09-10	38	14	1	11.5	13	0.5	23.5	99	19.65	9	2004	Friday	Rainy	0	0	0	0	1	0	1	0
2004-09-11	36	49	2	10.5	30	0	24.4	91	0.7	9	2004	Saturday	Rainy	0	0	0	0	0	1	1	0
2004-09-12	32	22.5	2	9	25.5	0	24.5	92	7.2	9	2004	Sunday	Rainy	0	0	0	0	0	0	1	0
2004-09-13	34	34	3	10	44	0	26.1	86	20.15	9	2004	Monday	Rainy	1	0	0	0	0	0	1	0
2004-09-14	36	30	3	11	34.5	0.5	24.6	92	33.5	9	2004	Tuesday	Rainy	0	1	0	0	0	0	1	0
2004-09-15	32		3	8	29.5	0.5	24.7	91	22.4	9	2004	Wednesday	Rainy	0	0	1	0	0	0	1	0
2004-09-16	28	18.5	2	9	22.5	0.5	25.1	91	21.65	9	2004	Thursday	Rainy	0	0	0	1	0	0	1	0
2004-09-17	28	33	2	11.5	11.5	0.5	24.2	97	8.9	9	2004	Friday	Rainy	0	0	0	0	1	0	1	0
2004-09-18	35	43	2	10.5	38.5	0.5	25.6	90	0.45	9	2004	Saturday	Rainy	0	0	0	0	0	1	1	0
2004-09-19	30	25	2	8	36	0.5	24.9	89	2.65	9	2004	Sunday	Rainy	0	0	0	0	0	0	1	0
2004-09-20	31	24.5	2.5	10	18.5	0.5	24.5	91	56.15	9	2004	Monday	Rainy	1	0	0	0	0	0	1	0
2004-09-21	32	19.5	2	11	19.5	0.5	24.6	94	8.7	9	2004	Tuesday	Rainy	0	1	0	0	0	0	1	0
2004-09-22	25	33	1.5	10.5	48	0.5	25.4	88	0	9	2004	Wednesday	Rainy	0	0	1	0	0	0	1	0
2004-09-23	37	33.5	1.5	10.5	34.5	0.5	26.3	85	0	9	2004	Thursday	Rainy	0	0	0	1	0	0	1	0
2004-09-24	38	39	1.5	12	39.5	0.5	26.7	86	0	9	2004	Friday	Rainy	0	0	0	0	1	0	1	0
2004-09-25	35	31	1.5	9.5	45	0.5	27.3	82	0	9	2004	Saturday	Rainy	0	0	0	0	0	1	1	0
2004-09-26	32	28.5	1	7	40.5	0	26.9	84	0	9	2004	Sunday	Rainy	0	0	0	0	0	0	1	0
2004-09-27	47	29	0.5	7.5	36	0	27.7	79	0	9	2004	Monday	Rainy	1	0	0	0	0	0	1	0
2004-09-28	39	29	0.5	8	37.5	0	26.1	88	0	9	2004	Tuesday	Rainy	0	1	0	0	0	0	1	0
2004-09-29	34	33.5	0.5	10	50.5	0.5	25.9	86	0	9	2004	Wednesday	Rainy	0	0	1	0	0	0	1	0
2004-09-30	30	56	0.5	12	56.5	0.5	25.9	80	0	9	2004	Thursday	Rainy	0	0	0	1	0	0	1	0
2004-10-01	43	45	1	10	36.5	0	27.4	77	3.35	10	2004	Friday	Rainy	0	0	0	0	1	0	1	0
2004-10-02	35	33	1	9	30	0	26.2	75	0.35	10	2004	Saturday	Rainy	0	0	0	0	0	1	1	0
2004-10-03	43	39.5	1	11	47	0.5	26.1	83	0	10	2004	Sunday	Rainy	0	0	0	0	0	0	1	0
2004-10-04	38	65	1	12	49	0.5	26.5	80	0	10	2004	Monday	Rainy	1	0	0	0	0	0	1	0
2004-10-05	33	59.5	1	12	41	0.5	27	79	0	10	2004	Tuesday	Rainy	0	1	0	0	0	0	1	0
2004-10-06	34	55.5	1	11	47	0.5	26.9	81	0	10	2004	Wednesday	Rainy	0	0	1	0	0	0	1	0
2004-10-07	33	57.5	1	11	44	0	26.4	80	0	10	2004	Thursday	Rainy	0	0	0	1	0	0	1	0
2004-10-08	43	62.5	1	13	57	0.5	26.6	80	0	10	2004	Friday	Rainy	0	0	0	0	1	0	1	0
2004-10-09	40	56	1	13.5	63	0.5	27	80	0	10	2004	Saturday	Rainy	0	0	0	0	0	1	1	0
2004-10-10	40	58	1	12.5	39.5	0.5	26.9	84	0.95	10	2004	Sunday	Rainy	0	0	0	0	0	0	1	0
2004-10-11	36	59	1	9.5	40.5	0	26.4	86	0.35	10	2004	Monday	Rainy	1	0	0	0	0	0	1	0
2004-10-12	33	43.5	0.5	10	37.5	0	24.9	88	0	10	2004	Tuesday	Rainy	0	1	0	0	0	0	1	0
2004-10-13	30	85	1	11.5	81.5	0.5	25.6	84	0	10	2004	Wednesday	Rainy	0	0	1	0	0	0	1	0
2004-10-14	29	88.5	1.5	14	51	0.5	25.8	80	0	10	2004	Thursday	Rainy	0	0	0	1	0	0	1	0
2004-10-15	28	94.5	3	15	44.5	1	25.8	82	0	10	2004	Friday	Winter	0	0	0	0	1	0	0	0
2004-10-16	37	90	4.5	12.5	44.5	0	26.1	79	0	10	2004	Saturday	Winter	0	0	0	0	0	1	0	0
2004-10-17	31	79	4.5	13	73	0	26.8	78	0.1	10	2004	Sunday	Winter	0	0	0	0	0	0	0	0
2004-10-18	29	55.5	4.5	14	45.5	0.5	25.1	87	14.2	10	2004	Monday	Winter	1	0	0	0	0	0	0	0
2004-10-19	27	69	1.5	13	52.5	0	26	82	0	10	2004	Tuesday	Winter	0	1	0	0	0	0	0	0
2004-10-20	25	66	0	14.5	68	0	25.6	82	0	10	2004	Wednesday	Winter	0	0	1	0	0	0	0	0
2004-10-21	28	86	0	15.5	72.5	0	26.1	79	3.5	10	2004	Thursday	Winter	0	0	0	1	0	0	0	0
2004-10-22	31	52.5	0	13	23.5	0	22.5	97	2.9	10	2004	Friday	Winter	0	0	0	0	1	0	0	0
2004-10-23	33	45.5	0	11	61.5	0	24	85	0	10	2004	Saturday	Winter	0	0	0	0	0	1	0	0
2004-10-24	31	38.5	1	14	51.5	0	24.6	80	0	10	2004	Sunday	Winter	0	0	0	0	0	0	0	0
2004-10-25	33	51	2.5	10	40.5	0	24.6	77	0	10	2004	Monday	Winter	1	0	0	0	0	0	0	0
2004-10-26	47	70	0.5	13	41.5	0.5	24.3	72	0	10	2004	Tuesday	Winter	0	1	0	0	0	0	0	0
2004-10-27	43	83	1	8	44	0	23.1	73	0	10	2004	Wednesday	Winter	0	0	1	0	0	0	0	0
2004-10-28	37	75.5	2	13.5	51.5	1	23.5	76	0	10	2004	Thursday	Winter	0	0	0	1	0	0	0	0
2004-10-29	42	65	1.5	15	48	1	24	80	0	10	2004	Friday	Winter	0	0	0	0	1	0	0	0
2004-10-30	31	57	1.5	14.5	49	1	24.5	77	0	10	2004	Saturday	Winter	0	0	0	0	0	1	0	0
2004-10-31	33	48	1.5	12	56.5	1	24.9	79	0	10	2004	Sunday	Winter	0	0	0	0	0	0	0	0
2004-11-01	44	48	1.5	13	36.5	1	25.4	77	0	11	2004	Monday	Winter	1	0	0	0	0	0	0	0
2004-11-02	32	45	1.5	13	42.5	0.5	24.9	77	0	11	2004	Tuesday	Winter	0	1	0	0	0	0	0	0
2004-11-03	29	51	1	15	40	1	24.3	78	0	11	2004	Wednesday	Winter	0	0	1	0	0	0	0	0
2004-11-04	24	57	1	17.5	48.5	1	23.8	79	0	11	2004	Thursday	Winter	0	0	0	1	0	0	0	0
2004-11-05	35	56	0.5	15.5	41	1	24.1	78	0	11	2004	Friday	Winter	0	0	0	0	1	0	0	0
2004-11-06	30	49.5	0.5	14.5	55.5	0.5	24.6	79	0	11	2004	Saturday	Winter	0	0	0	0	0	1	0	0
2004-11-07	32	52	0.5	14.5	71	1	25	77	0	11	2004	Sunday	Winter	0	0	0	0	0	0	0	0
2004-11-08	33	50.5	1	15.5	54	1	25.1	77	0	11	2004	Monday	Winter	1	0	0	0	0	0	0	0
2004-11-09	35	54.5	1	13.5	58.5	0.5	25.3	77	0	11	2004	Tuesday	Winter	0	1	0	0	0	0	0	0
2004-11-10	27	48.5	1	15.5	57.5	1	25.5	77	0	11	2004	Wednesday	Winter	0	0	1	0	0	0	0	0
2004-11-11	34	41	0.5	14.5	73.5	1	25.4	75	0	11	2004	Thursday	Winter	0	0	0	1	0	0	0	0
2004-11-12	28	49.5	0.5	15.5	69	1	26.1	75	0	11	2004	Friday	Winter	0	0	0	0	1	0	0	0
2004-11-13	26	41	0.5	17	71.5	1	26.1	76	0	11	2004	Saturday	Winter	0	0	0	0	0	1	0	0
2004-11-14	25	47	0.5	16	57.5	1	26.2	74	0	11	2004	Sunday	Winter	0	0	0	0	0	0	0	0
2004-11-15	39	49.5	0.5	17.5	64.5	1	26	76	0	11	2004	Monday	Winter	1	0	0	0	0	0	0	0
2004-11-16	38	52	1	14	54	1	25.7	78	1.8	11	2004	Tuesday	Winter	0	1	0	0	0	0	0	0
2004-11-17	24	35.5	1	9	42.5	0.5	25.4	81	9	11	2004	Wednesday	Winter	0	0	1	0	0	0	0	0
2004-11-18	25	23.5	1	8	35.5	1	24	77	0	11	2004	Thursday	Winter	0	0	0	1	0	0	0	0
2004-11-19	32	35.5	2	12.5	52	1	23.3	80	0	11	2004	Friday	Winter	0	0	0	0	1	0	0	0
2004-11-20	24	43	2	14	52.5	1	22.4	85	0	11	2004	Saturday	Winter	0	0	0	0	0	1	0	0
2004-11-21	34	38	1.5	12	50.5	1	23.6	79	0	11	2004	Sunday	Winter	0	0	0	0	0	0	0	0
2004-11-22	41	55.5	2	12	47.5	1	24.6	69	0	11	2004	Monday	Winter	1	0	0	0	0	0	0	0
2004-11-23	38	49.5	2.5	10	47	1	23.5	72	0	11	2004	Tuesday	Winter	0	1	0	0	0	0	0	0
2004-11-24	25	56.5	3	10.5	45	1	21.8	74	0	11	2004	Wednesday	Winter	0	0	1	0	0	0	0	0
2004-11-25	33	72	3	7.5	36	1	23	72	1.35	11	2004	Thursday	Winter	0	0	0	1	0	0	0	0
2004-11-26	40	40	1.5	8.5	20	1	21.4	94	19.7	11	2004	Friday	Winter	0	0	0	0	1	0	0	0
2004-11-27	36	37	0.5	8	21	0.5	22.2	87	0	11	2004	Saturday	Winter	0	0	0	0	0	1	0	0
2004-11-28	46	33	0.5	9	23	0.5	22.2	86	0	11	2004	Sunday	Winter	0	0	0	0	0	0	0	0
2004-11-29	32	28	0.5	7	33	0.5	22.2	83	15.35	11	2004	Monday	Winter	1	0	0	0	0	0	0	0
2004-11-30	33	17	1	6.5	24.5	0	21.9	80	0	11	2004	Tuesday	Winter	0	1	0	0	0	0	0	0
2004-12-01	56	26	1.5	10	26.5	0	23.2	73	0	12	2004	Wednesday	Winter	0	0	1	0	0	0	0	0
2004-12-02	34	29	1.5	11.5	38.5	0.5	21.9	75	0	12	2004	Thursday	Winter	0	0	0	1	0	0	0	0
2004-12-03	40	34.5	2	12.5	28	0.5	21.2	75	0	12	2004	Friday	Winter	0	0	0	0	1	0	0	0
2004-12-04	41	30.5	2	12	31.5	0.5	21.3	73	0	12	2004	Saturday	Winter	0	0	0	0	0	1	0	0
2004-12-05	38	43.5	2	15	38.5	0.5	20.8	72	0	12	2004	Sunday	Winter	0	0	0	0	0	0	0	0
2004-12-06	50	45	2	15	55.5	0.5	22	73	0	12	2004	Monday	Winter	1	0	0	0	0	0	0	0
2004-12-07	33	51	2	13.5	24.5	0.5	21.4	71	0	12	2004	Tuesday	Winter	0	1	0	0	0	0	0	0
2004-12-08	23	59.5	2	14.5	42	1	18.9	75	0	12	2004	Wednesday	Winter	0	0	1	0	0	0	0	0
2004-12-09	53	72.5	2	19.5	45.5	1	18.2	73	0	12	2004	Thursday	Winter	0	0	0	1	0	0	0	0
2004-12-10	33	63.5	1.5	14.5	46.5	0.5	18.7	77	0	12	2004	Friday	Winter	0	0	0	0	1	0	0	0
2004-12-11	31	63	2	14.5	39	0.5	19	76	0	12	2004	Saturday	Winter	0	0	0	0	0	1	0	0
2004-12-12	35	49	1.5	12.5	41	0.5	19.2	77	0	12	2004	Sunday	Winter	0	0	0	0	0	0	0	0
2004-12-13	42	61.5	1.5	17.5	49	1	18.3	71	0	12	2004	Monday	Winter	1	0	0	0	0	0	0	0
2004-12-14	43	74.5	1	20.5	67.5	1	18.6	75	0	12	2004	Tuesday	Winter	0	1	0	0	0	0	0	0
2004-12-15	45	74	0.5	18.5	43	0.5	19.5	73	0	12	2004	Wednesday	Winter	0	0	1	0	0	0	0	0
2004-12-16	32	63	1	17	48	0.5	19.5	71	0	12	2004	Thursday	Winter	0	0	0	1	0	0	0	0
2004-12-17	44	77	2	23.5	81	0.5	18.7	74	0	12	2004	Friday	Winter	0	0	0	0	1	0	0	0
2004-12-18	30	63.5	2	17.5	55	0.5	18.8	75	0	12	2004	Saturday	Winter	0	0	0	0	0	1	0	0
2004-12-19	43	52	2	17.5	59	0.5	18.6	74	0	12	2004	Sunday	Winter	0	0	0	0	0	0	0	0
2004-12-20	41	74.5	2	22.5	78.5	0.5	18.3	74	0	12	2004	Monday	Winter	1	0	0	0	0	0	0	0
2004-12-21	38	83	2	21	74.5	0.5	18.8	76	0	12	2004	Tuesday	Winter	0	1	0	0	0	0	0	0
2004-12-22	46	79.5	1	19	69	1	19	76	0	12	2004	Wednesday	Winter	0	0	1	0	0	0	0	0
2004-12-23	45	85	0	20	63	1	19.3	77	0	12	2004	Thursday	Winter	0	0	0	1	0	0	0	0
2004-12-24	44	87.5	0.5	25.5	78.5	1	20.2	76	0	12	2004	Friday	Winter	0	0	0	0	1	0	0	0
2004-12-25	39	81.5	0	22	85.5	1	20.4	77	0	12	2004	Saturday	Winter	0	0	0	0	0	1	0	0
2004-12-26	43	88	0	20.5	76.5	1	20.5	75	0	12	2004	Sunday	Winter	0	0	0	0	0	0	0	0
2004-12-27	48	92	0.5	22	79.5	1	20.9	78	0	12	2004	Monday	Winter	1	0	0	0	0	0	0	0
2004-12-28	25	87.5	0.5	21	70	1	20.6	78	0	12	2004	Tuesday	Winter	0	1	0	0	0	0	0	0
2004-12-29	34	94.5	1	25.5	63	1.5	20.5	77	0	12	2004	Wednesday	Winter	0	0	1	0	0	0	0	0
2004-12-30	16	73.5	1	21	66.5	1	20.1	73	0	12	2004	Thursday	Winter	0	0	0	1	0	0	0	0
2004-12-31	3	72	0.5	21	69	1	20.4	74	0	12	2004	Friday	Winter	0	0	0	0	1	0	0	0
2005-01-01	41		1	20.5	64.5	1	20.1	73	0	1	2005	Saturday	Winter	0	0	0	0	0	1	0	0
2005-01-02	41	67.5	1	20	78.5	1	19	74	0	1	2005	Sunday	Winter	0	0	0	0	0	0	0	0
2005-01-03	56	91	1.5	21.5	89.5	1	19.1	77	0	1	2005	Monday	Winter	1	0	0	0	0	0	0	0
2005-01-04	47	78.5	1.5	20.5	53.5	1	20.4	75	0	1	2005	Tuesday	Winter	0	1	0	0	0	0	0	0
2005-01-05	34	76	1	20.5	74.5	1	20.1	75	0	1	2005	Wednesday	Winter	0	0	1	0	0	0	0	0
2005-01-06	41	103.5	1.5	25	82.5	1	20.6	75	0	1	2005	Thursday	Winter	0	0	0	1	0	0	0	0
2005-01-07	41	103.5	1.5	26.5	74.5	1	20.9	75	0	1	2005	Friday	Winter	0	0	0	0	1	0	0	0
2005-01-08	38	95.5	1.5	24	70.5	1	21.4	75	0	1	2005	Saturday	Winter	0	0	0	0	0	1	0	0
2005-01-09	42	87.5	1	20	61	1	22.7	70	0	1	2005	Sunday	Winter	0	0	0	0	0	0	0	0
2005-01-10	39	119	2	26.5	57	1.5	22.3	70	0	1	2005	Monday	Winter	1	0	0	0	0	0	0	0
2005-01-11	33	89	1.5	20.5	67	1	21.9	72	0	1	2005	Tuesday	Winter	0	1	0	0	0	0	0	0
2005-01-12	36	85.5	2	20	55	1	21.9	67	0	1	2005	Wednesday	Winter	0	0	1	0	0	0	0	0
2005-01-13	20	75	2.5	22.5	65.5	1	20.5	63	0	1	2005	Thursday	Winter	0	0	0	1	0	0	0	0
2005-01-14	33	80.5	1.5	25.5	62.5	1	19.7	65	0	1	2005	Friday	Winter	0	0	0	0	1	0	0	0
2005-01-15	40	81.5	1	22	68	1	19.9	75	0	1	2005	Saturday	Winter	0	0	0	0	0	1	0	0
2005-01-16	37	84	0.5	18.5	52	1	20.2	78	0	1	2005	Sunday	Winter	0	0	0	0	0	0	0	0
2005-01-17	36	87.5	0.5	18.5	78.5	1	20.7	79	0	1	2005	Monday	Winter	1	0	0	0	0	0	0	0
2005-01-18	43	74.5	1	17	60.5	1	22.2	73	0	1	2005	Tuesday	Winter	0	1	0	0	0	0	0	0
2005-01-19	48	64	2	20.5	55	1.5	22.7	72	0	1	2005	Wednesday	Winter	0	0	1	0	0	0	0	0
2005-01-20	34	72.5	1.5	19	62	1.5	23.6	73	0	1	2005	Thursday	Winter	0	0	0	1	0	0	0	0
2005-01-21	33	69	1.5	19	52	1	23.9	74	0	1	2005	Friday	Winter	0	0	0	0	1	0	0	0
2005-01-22	23	49	1	14.5	61.5	1	24	69	0	1	2005	Saturday	Winter	0	0	0	0	0	1	0	0
2005-01-23	26	53	0.5	14	58.5	1	23.9	67	0	1	2005	Sunday	Winter	0	0	0	0	0	0	0	0
2005-01-24	30	65.5	1	19.5	63.5	1	24	66	0	1	2005	Monday	Winter	1	0	0	0	0	0	0	0
2005-01-25	36	71	2	21	73.5	1	22.9	65	0	1	2005	Tuesday	Winter	0	1	0	0	0	0	0	0
2005-01-26	39	81	1.5	22.5	86.5	1	22.2	66	0	1	2005	Wednesday	Winter	0	0	1	0	0	0	0	0
2005-01-27	38	76	0.5	21	81.5	1	22.3	63	0	1	2005	Thursday	Winter	0	0	0	1	0	0	0	0
2005-01-28	37	79.5	1	21	67	1	22.6	66	0	1	2005	Friday	Winter	0	0	0	0	1	0	0	0
2005-01-29	36	68	0.5	17	70	1	23.9	65	0	1	2005	Saturday	Winter	0	0	0	0	0	1	0	0
2005-01-30	41	70.5	1.5	20	82	1	24	62	0	1	2005	Sunday	Winter	0	0	0	0	0	0	0	0
2005-01-31	45	98.5	1.5	24	67.5	1	23.7	64	0	1	2005	Monday	Winter	1	0	0	0	0	0	0	0
2005-02-01	45	117	1.5	28	82.5	1	24.1	67	0	2	2005	Tuesday	Winter	0	1	0	0	0	0	0	0
2005-02-02	43	119.5	1.5	28	99.5	1	24.8	66	0	2	2005	Wednesday	Winter	0	0	1	0	0	0	0	0
2005-02-03	46	112	1.5	26	69.5	1	25.7	60	0	2	2005	Thursday	Winter	0	0	0	1	0	0	0	0
2005-02-04	24	101	2	25	69	1	25	60	0	2	2005	Friday	Winter	0	0	0	0	1	0	0	0
2005-02-05	39	92	2.5	22	68	1.5	26	61	0	2	2005	Saturday	Winter	0	0	0	0	0	1	0	0
2005-02-06	36	62	2.5	13.5	59.5	1	26.3	58	0	2	2005	Sunday	Winter	0	0	0	0	0	0	0	0
2005-02-07	37	66.5	3	20.5	65	1	24.9	58	0	2	2005	Monday	Winter	1	0	0	0	0	0	0	0
2005-02-08	25	85.5	3.5	17	67.5	1	24.4	55	0	2	2005	Tuesday	Winter	0	1	0	0	0	0	0	0
2005-02-09	44	101	3.5	21.5	95.5	1	23.9	52	0	2	2005	Wednesday	Winter	0	0	1	0	0	0	0	0
2005-02-10	35	137.5	3.5	26	82.5	1.5	23.3	56	0	2	2005	Thursday	Winter	0	0	0	1	0	0	0	0
2005-02-11	33	203	3	39	94.5	2	23.8	62	0	2	2005	Friday	Winter	0	0	0	0	1	0	0	0
2005-02-12	51	137.5	1	22.5	70.5	1	26.5	60	0	2	2005	Saturday	Winter	0	0	0	0	0	1	0	0
2005-02-13	40	111	2	22	66.5	1	24.1	56	0	2	2005	Sunday	Winter	0	0	0	0	0	0	0	0
2005-02-14	26	105	2	18	71	1	25	48	0	2	2005	Monday	Winter	1	0	0	0	0	0	0	0
2005-02-15	37	85.5	2	14	64	0.5	26.2	48	0	2	2005	Tuesday	Summer	0	1	0	0	0	0	0	1
2005-02-16	36	99	2	20	79	1	25.6	48	0	2	2005	Wednesday	Summer	0	0	1	0	0	0	0	1
2005-02-17	40	112.5	2.5	25	81.5	1	26.5	45	0	2	2005	Thursday	Summer	0	0	0	1	0	0	0	1
2005-02-18	40	138.5	3.5	28	99.5	1	25.7	50	0	2	2005	Friday	Summer	0	0	0	0	1	0	0	1
2005-02-19	42	144	2	29.5	106.5	1	24.8	50	0	2	2005	Saturday	Summer	0	0	0	0	0	1	0	1
2005-02-20	28	180	2.5	29.5	84	1	24.8	52	0	2	2005	Sunday	Summer	0	0	0	0	0	0	0	1
2005-02-21	33	156.5	2.5	26.5	71	1.5	26	60	0	2	2005	Monday	Summer	1	0	0	0	0	0	0	1
2005-02-22	25	130.5	3.5	18	66.5	1.5	25.4	56	0	2	2005	Tuesday	Summer	0	1	0	0	0	0	0	1
2005-02-23	19	108.5	2	23.5	73.5	1.5	26	48	0	2	2005	Wednesday	Summer	0	0	1	0	0	0	0	1
2005-02-24	31	128	2.5	28	84.5	1.5	24.2	50	0	2	2005	Thursday	Summer	0	0	0	1	0	0	0	1
2005-02-25	23	168.5	3	33.5	101	1.5	23.6	52	0	2	2005	Friday	Summer	0	0	0	0	1	0	0	1
2005-02-26	29	171.5	2.5	27	105	1	24.6	50	0	2	2005	Saturday	Summer	0	0	0	0	0	1	0	1
2005-02-27	43	154.5	2.5	26	85.5	1.5	25.1	52	0	2	2005	Sunday	Summer	0	0	0	0	0	0	0	1
2005-02-28	32	152.5	2.5	28	81	1.5	25.4	53	0	2	2005	Monday	Summer	1	0	0	0	0	0	0	1
2005-03-01	38	109	2	22	71.5	1	26.1	50	0	3	2005	Tuesday	Summer	0	1	0	0	0	0	0	1
2005-03-02	39	101.5	2	20.5	63.5	1	26.4	44	0	3	2005	Wednesday	Summer	0	0	1	0	0	0	0	1
2005-03-03	42	116	2	24.5	76.5	1	26	48	0	3	2005	Thursday	Summer	0	0	0	1	0	0	0	1
2005-03-04	29	120	2	17.5	52	1	25.8	60	12.6	3	2005	Friday	Summer	0	0	0	0	1	0	0	1
2005-03-05	26	40	1.5	7.5	35	0.5	19.5	70	0	3	2005	Saturday	Summer	0	0	0	0	0	1	0	1
2005-03-06	33	67.5	1.5	16	63	1	20.8	66	0	3	2005	Sunday	Summer	0	0	0	0	0	0	0	1
2005-03-07	42	109	2	21.5	72	1	23.3	61	0	3	2005	Monday	Summer	1	0	0	0	0	0	0	1
2005-03-08	29	144	5	32	73	2	25.3	62	0	3	2005	Tuesday	Summer	0	1	0	0	0	0	0	1
2005-03-09	37	116	4	27	71	1	27	59	0	3	2005	Wednesday	Summer	0	0	1	0	0	0	0	1
2005-03-10	40						27.7	53	0	3	2005	Thursday	Summer	0	0	0	1	0	0	0	1
2005-03-11	31	104	0	13	93	1	27.7	51	0	3	2005	Friday	Summer	0	0	0	0	1	0	0	1
2005-03-12	43	151	3	27	77.5	1.5	27.9	53	0	3	2005	Saturday	Summer	0	0	0	0	0	1	0	1
2005-03-13	44	122.5	0	14	78	1	28.8	53	0	3	2005	Sunday	Summer	0	0	0	0	0	0	0	1
2005-03-14	31	85	0.5	8	62	0.5	26.7	65	9.6	3	2005	Monday	Summer	1	0	0	0	0	0	0	1
2005-03-15	29	61	1.5	12	66	1	25	76	0	3	2005	Tuesday	Summer	0	1	0	0	0	0	0	1
2005-03-16	46	47.5	2	11	54	1	27.5	61	0	3	2005	Wednesday	Summer	0	0	1	0	0	0	0	1
2005-03-17	30	62	2.5	15.5	58.5	1	27.5	60	0	3	2005	Thursday	Summer	0	0	0	1	0	0	0	1
2005-03-18	36	69	2	10.5	55	0.5	27	64	0.4	3	2005	Friday	Summer	0	0	0	0	1	0	0	1
2005-03-19	23	64	2	8	77	0.5	26.4	74	2.1	3	2005	Saturday	Summer	0	0	0	0	0	1	0	1
2005-03-20	32	63	2	8	58.5	0.5	26.7	71	0	3	2005	Sunday	Summer	0	0	0	0	0	0	0	1
2005-03-21	39	67	1	10.5	64.5	0.5	28.6	59	0	3	2005	Monday	Summer	1	0	0	0	0	0	0	1
2005-03-22	37	100	1	16	76	1	28.6	49	0	3	2005	Tuesday	Summer	0	1	0	0	0	0	0	1
2005-03-23	33	139	2	17	83	1	27.7	49	0	3	2005	Wednesday	Summer	0	0	1	0	0	0	0	1
2005-03-24	35	139.5	1.5	12	73	1	28.9	53	0	3	2005	Thursday	Summer	0	0	0	1	0	0	0	1
2005-03-25	30	51.5	0	6.5	52	0	27.8	66	0	3	2005	Friday	Summer	0	0	0	0	1	0	0	1
2005-03-26	21	63.5	0	8	46	0.5	28.5	58	0	3	2005	Saturday	Summer	0	0	0	0	0	1	0	1
2005-03-27	35	100	0.5	12.5	58.5	1	28.5	51	0	3	2005	Sunday	Summer	0	0	0	0	0	0	0	1
2005-03-28	35	115	0.5	13.5	81.5	1	28.4	50	0	3	2005	Monday	Summer	1	0	0	0	0	0	0	1
2005-03-29	39	153	1.5	15	82	1	28.8	47	0	3	2005	Tuesday	Summer	0	1	0	0	0	0	0	1
2005-03-30	25	120.5	1.5	22.5	66	1	28.9	45	0	3	2005	Wednesday	Summer	0	0	1	0	0	0	0	1
2005-03-31	39	136	2.5	27.5	75	1	28.6	46	0	3	2005	Thursday	Summer	0	0	0	1	0	0	0	1
2005-04-01	28	159	2	28	89.5	1	28.7	44	0	4	2005	Friday	Summer	0	0	0	0	1	0	0	1
2005-04-02	38	155.5	1	19	88.5	1	29.6	47	0	4	2005	Saturday	Summer	0	0	0	0	0	1	0	1
2005-04-03	43	78	0	10	44.5	0.5	27.4	68	46.9	4	2005	Sunday	Summer	0	0	0	0	0	0	0	1
2005-04-04	45	37.5	0	12	29	0.5	23	93	2.7	4	2005	Monday	Summer	1	0	0	0	0	0	0	1
2005-04-05	38	41	0	10	22.5	0.5	23.1	91	0	4	2005	Tuesday	Summer	0	1	0	0	0	0	0	1
2005-04-06	41	57	0.5	12	58	0.5	25.7	74	0	4	2005	Wednesday	Summer	0	0	1	0	0	0	0	1
2005-04-07	30	102	0.5	18	72.5	1	27.1	61	0	4	2005	Thursday	Summer	0	0	0	1	0	0	0	1
2005-04-08	36	74.5	0	17	72	1	28	55	0	4	2005	Friday	Summer	0	0	0	0	1	0	0	1
2005-04-09	42	82.5	0	15.5	61.5	0	30.2	55	0	4	2005	Saturday	Summer	0	0	0	0	0	1	0	1
2005-04-10	42	69	0.5	13	53.5	1	31.1	41	0	4	2005	Sunday	Summer	0	0	0	0	0	0	0	1
2005-04-11	36	73	0	19	43	0	29.8	68	3.9	4	2005	Monday	Summer	1	0	0	0	0	0	0	1
2005-04-12	30	49	1	14	48	0	29	74	1.8	4	2005	Tuesday	Summer	0	1	0	0	0	0	0	1
2005-04-13	35	37	0.5	6.5	50	0	28.4	74	0.2	4	2005	Wednesday	Summer	0	0	1	0	0	0	0	1
2005-04-14	33	29	0.5	6	36	0	29.1	70	0	4	2005	Thursday	Summer	0	0	0	1	0	0	0	1
2005-04-15	49	42	1	8.5	47.5	0	30.6	61	0	4	2005	Friday	Summer	0	0	0	0	1	0	0	1
2005-04-16	35	56	1	10.5	58.5	0	30.3	52	0	4	2005	Saturday	Summer	0	0	0	0	0	1	0	1
2005-04-17	45	71	1.5	13.5	66.5	0.5	29.4	48	0	4	2005	Sunday	Summer	0	0	0	0	0	0	0	1
2005-04-18	34	77.5	1.5	14	66.5	0.5	30.1	49	0	4	2005	Monday	Summer	1	0	0	0	0	0	0	1
2005-04-19	39	76	1	12	77	0	31	51	0	4	2005	Tuesday	Summer	0	1	0	0	0	0	0	1
2005-04-20	44	62.5	1.5	10.5	53	0.5	29.5	63	0	4	2005	Wednesday	Summer	0	0	1	0	0	0	0	1
2005-04-21	33	34.5	2	9	81	0	28.7	65	0	4	2005	Thursday	Summer	0	0	0	1	0	0	0	1
2005-04-22	43	44	2.5	10.5	74	0.5	30.9	56	0	4	2005	Friday	Summer	0	0	0	0	1	0	0	1
2005-04-23	41	63	2.5	12	77	0.5	29.4	63	0	4	2005	Saturday	Summer	0	0	0	0	0	1	0	1
2005-04-24	33	68	2.5	14	65	1	30	59	0	4	2005	Sunday	Summer	0	0	0	0	0	0	0	1
2005-04-25	28	75	2.5	14	72.5	1	30.7	59	0	4	2005	Monday	Summer	1	0	0	0	0	0	0	1
2005-04-26	50	59	2	8.5	76.5	0.5	30.4	60	0	4	2005	Tuesday	Summer	0	1	0	0	0	0	0	1
2005-04-27	34	54.5	1	9.5	56.5	0.5	31	57	0	4	2005	Wednesday	Summer	0	0	1	0	0	0	0	1
2005-04-28	42	45	1	12.5	69	0.5	29.8	57	0	4	2005	Thursday	Summer	0	0	0	1	0	0	0	1
2005-04-29	34	61	1	11.5	69	0.5	30.9	52	0	4	2005	Friday	Summer	0	0	0	0	1	0	0	1
2005-04-30	35	53.5	0.5	10	72.5	0.5	31.6	51	1.7	4	2005	Saturday	Summer	0	0	0	0	0	1	0	1
2005-05-01	36	61.5	0.5	9.5	72.5	0.5	29.2	59	0	5	2005	Sunday	Summer	0	0	0	0	0	0	0	1
2005-05-02	36	48.5	0	3	56	0	28.4	69	26.8	5	2005	Monday	Summer	1	0	0	0	0	0	0	1
2005-05-03	37	34	1	6	55.5	0	27.7	77	0	5	2005	Tuesday	Summer	0	1	0	0	0	0	0	1
2005-05-04	37	37.5	1	9	57.5	0	30.9	61	0	5	2005	Wednesday	Summer	0	0	1	0	0	0	0	1
2005-05-05	38	52	2	8.5	52	0	31.1	53	0	5	2005	Thursday	Summer	0	0	0	1	0	0	0	1
2005-05-06	24	40	1	7	35.5	0	26.6	78	3.6	5	2005	Friday	Summer	0	0	0	0	1	0	0	1
2005-05-07	44	17	1	6	21.5	0	23.2	92	8.1	5	2005	Saturday	Summer	0	0	0	0	0	1	0	1
2005-05-08	38	16.5	1	7	20.5	0	23	99	20.4	5	2005	Sunday	Summer	0	0	0	0	0	0	0	1
2005-05-09	39	27	1.5	8.5	39.5	0	26.3	86	0	5	2005	Monday	Summer	1	0	0	0	0	0	0	1
2005-05-10	38	50.5	1.5	8	58.5	0	29	74	0	5	2005	Tuesday	Summer	0	1	0	0	0	0	0	1
2005-05-11	31	55.5	1.5	7	62	0	29.1	73	0	5	2005	Wednesday	Summer	0	0	1	0	0	0	0	1
2005-05-12	44	46.5	1	7	46.5	0	30.7	70	0	5	2005	Thursday	Summer	0	0	0	1	0	0	0	1
2005-05-13	43	43.5	0.5	6.5	50.5	0	29.2	73	0	5	2005	Friday	Summer	0	0	0	0	1	0	0	1
2005-05-14	38	55	0.5	10	65	0.5	29.4	73	0	5	2005	Saturday	Summer	0	0	0	0	0	1	0	1
2005-05-15	25	60.5	1	8	75	0	30.2	61	0	5	2005	Sunday	Rainy	0	0	0	0	0	0	1	0
2005-05-16	43	48.5	0.5	7	71	0	31	59	0	5	2005	Monday	Rainy	1	0	0	0	0	0	1	0
2005-05-17	37	55.5	0	8.5	75	0	31.2	62	0	5	2005	Tuesday	Rainy	0	1	0	0	0	0	1	0
2005-05-18	31	45	0	6.5	53.5	0	30.4	63	0	5	2005	Wednesday	Rainy	0	0	1	0	0	0	1	0
2005-05-19	35	48.5	0	6.5	74.5	0	29.8	66	0	5	2005	Thursday	Rainy	0	0	0	1	0	0	1	0
2005-05-20	26	35	0	5.5	58	0	29.6	64	0	5	2005	Friday	Rainy	0	0	0	0	1	0	1	0
2005-05-21	32	35	0	6.5	68.5	0	29	67	1.3	5	2005	Saturday	Rainy	0	0	0	0	0	1	1	0
2005-05-22	25	35.5	0	6.5	68.5	0	28.4	72	0	5	2005	Sunday	Rainy	0	0	0	0	0	0	1	0
2005-05-23	39	37.5	0	5	58.5	0	29	65	0	5	2005	Monday	Rainy	1	0	0	0	0	0	1	0
2005-05-24	28	42	1	8.5	53.5	0	29.9	65	1.9	5	2005	Tuesday	Rainy	0	1	0	0	0	0	1	0
2005-05-25	33	29	1	6	56.5	0	28.3	77	0	5	2005	Wednesday	Rainy	0	0	1	0	0	0	1	0
2005-05-26	36	29.5	2	6	62	0	29	72	0	5	2005	Thursday	Rainy	0	0	0	1	0	0	1	0
2005-05-27	30	35	2	7.5	53.5	0	27.7	79	2.4	5	2005	Friday	Rainy	0	0	0	0	1	0	1	0
2005-05-28	28	29.5	1.5	6	49.5	0	29.1	72	0	5	2005	Saturday	Rainy	0	0	0	0	0	1	1	0
2005-05-29	34	33	2	6	58.5	0	29	73	11	5	2005	Sunday	Rainy	0	0	0	0	0	0	1	0
2005-05-30	40	30	2	8.5	39	0	24.5	92	28.8	5	2005	Monday	Rainy	1	0	0	0	0	0	1	0
2005-05-31	47	29	2	7.5	54.5	0	27.2	82	0.4	5	2005	Tuesday	Rainy	0	1	0	0	0	0	1	0
2005-06-01	25	24	1.5	7	57.5	0	27	87	18.7	6	2005	Wednesday	Rainy	0	0	1	0	0	0	1	0
2005-06-02	31	21	1	5.5	40	0	27.2	87	23.5	6	2005	Thursday	Rainy	0	0	0	1	0	0	1	0
2005-06-03	22	19	1	6	36	0	26.7	92	16.4	6	2005	Friday	Rainy	0	0	0	0	1	0	1	0
2005-06-04	30	20.5	1.5	6.5	26.5	0	26.9	90	2.8	6	2005	Saturday	Rainy	0	0	0	0	0	1	1	0
2005-06-05	29	30	1.5	7	32	0	27.6	89	7.2	6	2005	Sunday	Rainy	0	0	0	0	0	0	1	0
2005-06-06	53	39	1.5	6	51	0	28.9	80	20.7	6	2005	Monday	Rainy	1	0	0	0	0	0	1	0
2005-06-07	34	31.5	1.5	6	48	0	28.1	87	0.1	6	2005	Tuesday	Rainy	0	1	0	0	0	0	1	0
2005-06-08	26	36	1.5	7.5	49.5	0	27.9	85	0.2	6	2005	Wednesday	Rainy	0	0	1	0	0	0	1	0
2005-06-09	28	23.5	1.5	6.5	23	0	27	87	3.3	6	2005	Thursday	Rainy	0	0	0	1	0	0	1	0
2005-06-10	32	24.5	3	6.5	22	0	26.5	92	4.3	6	2005	Friday	Rainy	0	0	0	0	1	0	1	0
2005-06-11	33	22	1	5	22	0	27.5	83	0	6	2005	Saturday	Rainy	0	0	0	0	0	1	1	0
2005-06-12	31	19.5	3.5	4.5	17	0	28	84	0	6	2005	Sunday	Rainy	0	0	0	0	0	0	1	0
2005-06-13	38	22	0.5	7	30	0	26.6	86	9.2	6	2005	Monday	Rainy	1	0	0	0	0	0	1	0
2005-06-14	29	27.5	2	7.5	20	0	27.7	86	0	6	2005	Tuesday	Rainy	0	1	0	0	0	0	1	0
2005-06-15	40	37	2	8	38.5	0	27.4	83	17.4	6	2005	Wednesday	Rainy	0	0	1	0	0	0	1	0
2005-06-16	27	29.5	2	7.5	33.5	0	27.8	84	0.3	6	2005	Thursday	Rainy	0	0	0	1	0	0	1	0
2005-06-17	28	30	1	8.5	24.5	0	27.9	83	6.5	6	2005	Friday	Rainy	0	0	0	0	1	0	1	0
2005-06-18	33	27.5	0	8	27.5	0	28.4	77	0	6	2005	Saturday	Rainy	0	0	0	0	0	1	1	0
2005-06-19	41	25.5	0	6	24	0	27.5	82	19.7	6	2005	Sunday	Rainy	0	0	0	0	0	0	1	0
2005-06-20	37	25	0.5	6	25.5	0	28.3	86	7.4	6	2005	Monday	Rainy	1	0	0	0	0	0	1	0
2005-06-21	39	18.5	2	3	14.5	0	27.5	88	18.8	6	2005	Tuesday	Rainy	0	1	0	0	0	0	1	0
2005-06-22	30	29	5	6	18.5	0	26.4	92	0	6	2005	Wednesday	Rainy	0	0	1	0	0	0	1	0
2005-06-23	33	24.5	1	5	11	0	27.3	85	12.6	6	2005	Thursday	Rainy	0	0	0	1	0	0	1	0
2005-06-24	29	21.5	2.5	6	21	0	28.2	78	0	6	2005	Friday	Rainy	0	0	0	0	1	0	1	0
2005-06-25	34	23	1	5	13.5	0	28.1	75	0	6	2005	Saturday	Rainy	0	0	0	0	0	1	1	0
2005-06-26	42	19	0.5	3.5	18	0	27.9	74	0	6	2005	Sunday	Rainy	0	0	0	0	0	0	1	0
2005-06-27	52	24	0.5	5	18.5	0	26.3	85	2	6	2005	Monday	Rainy	1	0	0	0	0	0	1	0
2005-06-28	33	25	1	3	17	0	27	84	2.4	6	2005	Tuesday	Rainy	0	1	0	0	0	0	1	0
2005-06-29	38	27	1	4	20	0	28.8	76	0	6	2005	Wednesday	Rainy	0	0	1	0	0	0	1	0
2005-06-30	27	27	1	4	27	0	29.8	71	0	6	2005	Thursday	Rainy	0	0	0	1	0	0	1	0
2005-07-01	26	29.5	0.5	7.5	30	1	28.2	75	0	7	2005	Friday	Rainy	0	0	0	0	1	0	1	0
2005-07-02	33	31.5	0	8.5	32	1	28	76	0.2	7	2005	Saturday	Rainy	0	0	0	0	0	1	1	0
2005-07-03	33	24.5	0.5	7.5	34.5	1	28.4	76	0	7	2005	Sunday	Rainy	0	0	0	0	0	0	1	0
2005-07-04	32	25	0	6.5	44	1	28.8	78	0	7	2005	Monday	Rainy	1	0	0	0	0	0	1	0
2005-07-05	48	35.5	4	7.5	51	1	30.2	75	8.1	7	2005	Tuesday	Rainy	0	1	0	0	0	0	1	0
2005-07-06	43	26	1	8	32	1	29.5	80	0	7	2005	Wednesday	Rainy	0	0	1	0	0	0	1	0
2005-07-07	35	25	1	5	28	0	29.8	73	0	7	2005	Thursday	Rainy	0	0	0	1	0	0	1	0
2005-07-08	38	24	1	7.5	25.5	0	29.4	73	0	7	2005	Friday	Rainy	0	0	0	0	1	0	1	0
2005-07-09	25	26.5	1.5	7.5	29	0.5	27.3	82	1.5	7	2005	Saturday	Rainy	0	0	0	0	0	1	1	0
2005-07-10	32	33	1	7	26.5	0.5	28.3	81	0	7	2005	Sunday	Rainy	0	0	0	0	0	0	1	0
2005-07-11	28	35	1	8	35	0.5	29.5	76	0	7	2005	Monday	Rainy	1	0	0	0	0	0	1	0
2005-07-12	29	39.5	1.5	7.5	34.5	0.5	28.2	80	47.7	7	2005	Tuesday	Rainy	0	1	0	0	0	0	1	0
2005-07-13	28	12	1	5	19.5	0	24.9	94	2.3	7	2005	Wednesday	Rainy	0	0	1	0	0	0	1	0
2005-07-14	32	22.5	1.5	8	28.5	0.5	26.1	89	33.6	7	2005	Thursday	Rainy	0	0	0	1	0	0	1	0
2005-07-15	28	20.5	1.5	6	21.5	0.5	25.8	90	3.2	7	2005	Friday	Rainy	0	0	0	0	1	0	1	0
2005-07-16	30	18.5	2	5.5	32.5	0.5	26.8	84	0.1	7	2005	Saturday	Rainy	0	0	0	0	0	1	1	0
2005-07-17	30	26	2	5.5	30	0.5	28.3	79	0	7	2005	Sunday	Rainy	0	0	0	0	0	0	1	0
2005-07-18	42	30.5	1	2	41	0	28.5	79	0	7	2005	Monday	Rainy	1	0	0	0	0	0	1	0
2005-07-19	27	20	2.5	1	42	0	27.1	84	4.8	7	2005	Tuesday	Rainy	0	1	0	0	0	0	1	0
2005-07-20	19		6				26.8	85	19.9	7	2005	Wednesday	Rainy	0	0	1	0	0	0	1	0
2005-07-21	29	24.5	1	8.5	20	0.5	25.8	92	2	7	2005	Thursday	Rainy	0	0	0	1	0	0	1	0
2005-07-22	30	18.5	1	7.5	23.5	0.5	26.5	89	27.1	7	2005	Friday	Rainy	0	0	0	0	1	0	1	0
2005-07-23	32	21	1	9	23	1	26.3	87	0	7	2005	Saturday	Rainy	0	0	0	0	0	1	1	0
2005-07-24	31	20	1	9	18	1	25.3	93	15.4	7	2005	Sunday	Rainy	0	0	0	0	0	0	1	0
2005-07-25	28	35	2	13	18	1	24.3	96	7.6	7	2005	Monday	Rainy	1	0	0	0	0	0	1	0
2005-07-26	25	29	2	11.5	23	0.5	24.9	93	5.6	7	2005	Tuesday	Rainy	0	1	0	0	0	0	1	0
2005-07-27	37	23	2	9.5	25	0.5	26.4	86	0	7	2005	Wednesday	Rainy	0	0	1	0	0	0	1	0
2005-07-28	33	24.5	1	9	24	0.5	27.1	82	0	7	2005	Thursday	Rainy	0	0	0	1	0	0	1	0
2005-07-29	33	26	0.5	8.5	33	0.5	27.6	81	0	7	2005	Friday	Rainy	0	0	0	0	1	0	1	0
2005-07-30	33	28.5	1	7	31.5	0.5	27.5	83	0	7	2005	Saturday	Rainy	0	0	0	0	0	1	1	0
2005-07-31	39	28.5	0.5	7.5	28	0.5	27.4	82	0	7	2005	Sunday	Rainy	0	0	0	0	0	0	1	0
2005-08-01	32	30.5	1.5	10.5	12.5	0.5	25.4	90	11.8	8	2005	Monday	Rainy	1	0	0	0	0	0	1	0
2005-08-02	34	16.5	0.5	7	19.5	0.5	26.6	84	0	8	2005	Tuesday	Rainy	0	1	0	0	0	0	1	0
2005-08-03	27	20	0	5	27	0	26.8	83	0	8	2005	Wednesday	Rainy	0	0	1	0	0	0	1	0
2005-08-04	34	29	0	6	28	0	26.9	84	4.9	8	2005	Thursday	Rainy	0	0	0	1	0	0	1	0
2005-08-05	28	31	1	7	26	0	26.4	88	0	8	2005	Friday	Rainy	0	0	0	0	1	0	1	0
2005-08-06	41	24	0	5	28	0	26.7	86	2.8	8	2005	Saturday	Rainy	0	0	0	0	0	1	1	0
2005-08-07	22	36.5	0.5	9	34	0.5	26.6	90	4.9	8	2005	Sunday	Rainy	0	0	0	0	0	0	1	0
2005-08-08	34	32.5	1.5	9.5	24	1	26.5	84	4.5	8	2005	Monday	Rainy	1	0	0	0	0	0	1	0
2005-08-09	43	28	0.5	8	18.5	0.5	25.9	88	0.4	8	2005	Tuesday	Rainy	0	1	0	0	0	0	1	0
2005-08-10	37	25.5	0.5	7	20.5	0.5	26.5	83	0	8	2005	Wednesday	Rainy	0	0	1	0	0	0	1	0
2005-08-11	27	27.5	0.5	7.5	22	0.5	26.3	83	0.8	8	2005	Thursday	Rainy	0	0	0	1	0	0	1	0
2005-08-12	31	30	0.5	8	22	0.5	25.1	93	38.5	8	2005	Friday	Rainy	0	0	0	0	1	0	1	0
2005-08-13	22	14	0	4	23	0	23.6	97	13.1	8	2005	Saturday	Rainy	0	0	0	0	0	1	1	0
2005-08-14	35	16	0	3	19	0	25.6	89	9.8	8	2005	Sunday	Rainy	0	0	0	0	0	0	1	0
2005-08-15	38	26	0	4	22	1	26.1	86	0	8	2005	Monday	Rainy	1	0	0	0	0	0	1	0
2005-08-16	44	40	1	9.5	19.5	1	26.4	90	2.4	8	2005	Tuesday	Rainy	0	1	0	0	0	0	1	0
2005-08-17	29	32	1	10.5	10	1	24.3	96	11.1	8	2005	Wednesday	Rainy	0	0	1	0	0	0	1	0
2005-08-18	22	24	1	10	11.5	1	24.5	95	2.4	8	2005	Thursday	Rainy	0	0	0	1	0	0	1	0
2005-08-19	25	31.5	2	11	19.5	1	25.4	92	0.1	8	2005	Friday	Rainy	0	0	0	0	1	0	1	0
2005-08-20	38	27	1	8	24	1	26.4	88	0.9	8	2005	Saturday	Rainy	0	0	0	0	0	1	1	0
2005-08-21	26	25	1	7	31	0	26.5	86	7.2	8	2005	Sunday	Rainy	0	0	0	0	0	0	1	0
2005-08-22	34	30	1	9	40	0	26.2	88	3.5	8	2005	Monday	Rainy	1	0	0	0	0	0	1	0
2005-08-23	45	30	1	7	21	1	26.9	87	5	8	2005	Tuesday	Rainy	0	1	0	0	0	0	1	0
2005-08-24	27	28	1.5	9	20.5	0.5	26.5	86	0	8	2005	Wednesday	Rainy	0	0	1	0	0	0	1	0
2005-08-25	30	41.5	1	8.5	27	0.5	27	85	0.6	8	2005	Thursday	Rainy	0	0	0	1	0	0	1	0
2005-08-26	30	34.5	1.5	10	42	1	27	86	0	8	2005	Friday	Rainy	0	0	0	0	1	0	1	0
2005-08-27	36	28.5	1.5	8	30	1	27.3	87	12.3	8	2005	Saturday	Rainy	0	0	0	0	0	1	1	0
2005-08-28	37	31	1.5	9.5	49.5	1	25.5	92	6.8	8	2005	Sunday	Rainy	0	0	0	0	0	0	1	0
2005-08-29	32	40.5	1.5	11.5	32.5	1	27.6	86	0	8	2005	Monday	Rainy	1	0	0	0	0	0	1	0
2005-08-30	31	34.5	1.5	11.5	44.5	1	26.7	88	0.1	8	2005	Tuesday	Rainy	0	1	0	0	0	0	1	0
2005-08-31	33	18	1	6	24	0	26.8	87	11.3	8	2005	Wednesday	Rainy	0	0	1	0	0	0	1	0
2005-09-01	38	15	1	6	12	0	25.5	92	28.3	9	2005	Thursday	Rainy	0	0	0	1	0	0	1	0
2005-09-02	30	25.5	1	11	39.5	0.5	27	88	7.3	9	2005	Friday	Rainy	0	0	0	0	1	0	1	0
2005-09-03	32	25	1	12	38.5	0.5	24.2	95	34.3	9	2005	Saturday	Rainy	0	0	0	0	0	1	1	0
2005-09-04	36	43	1	9.5	42	0.5	25.8	88	0	9	2005	Sunday	Rainy	0	0	0	0	0	0	1	0
2005-09-05	24	37	1	8	25	0	26.3	89	50	9	2005	Monday	Rainy	1	0	0	0	0	0	1	0
2005-09-06	37	30	1	6	49	0	26.6	87	6.5	9	2005	Tuesday	Rainy	0	1	0	0	0	0	1	0
2005-09-07	28	32.5	1.5	10	51	0.5	26.6	87	12.7	9	2005	Wednesday	Rainy	0	0	1	0	0	0	1	0
2005-09-08	29	25	1.5	9	41	0.5	25.8	91	9.3	9	2005	Thursday	Rainy	0	0	0	1	0	0	1	0
2005-09-09	30	22.5	1.5	9	24.5	0.5	25.8	89	5.3	9	2005	Friday	Rainy	0	0	0	0	1	0	1	0
2005-09-10	22	17.5	1.5	8	27	0.5	25.1	92	41	9	2005	Saturday	Rainy	0	0	0	0	0	1	1	0
2005-09-11	31	16	1.5	6.5	23	0.5	24.7	91	53.2	9	2005	Sunday	Rainy	0	0	0	0	0	0	1	0
2005-09-12	48	20	1.5	9.5	34	0.5	25.3	90	2.9	9	2005	Monday	Rainy	1	0	0	0	0	0	1	0
2005-09-13	48	42	1.5	9	27.5	0.5	26.9	82	0	9	2005	Tuesday	Rainy	0	1	0	0	0	0	1	0
2005-09-14	26	58	1.5	8	28.5	0.5	26.6	81	9.3	9	2005	Wednesday	Rainy	0	0	1	0	0	0	1	0
2005-09-15	32	26	1.5	10.5	26.5	1	25.2	89	4.4	9	2005	Thursday	Rainy	0	0	0	1	0	0	1	0
2005-09-16	30	26	1.5	11	22	0.5	26.3	88	0	9	2005	Friday	Rainy	0	0	0	0	1	0	1	0
2005-09-17	45	25	1	10	39	0	27.3	85	0.9	9	2005	Saturday	Rainy	0	0	0	0	0	1	1	0
2005-09-18	32	20	1	9	20	0	27.8	83	50	9	2005	Sunday	Rainy	0	0	0	0	0	0	1	0
2005-09-19	45	18	1	11	21	0	24.4	93	69.1	9	2005	Monday	Rainy	1	0	0	0	0	0	1	0
2005-09-20	40	16	1	11	30	0	24.5	94	0	9	2005	Tuesday	Rainy	0	1	0	0	0	0	1	0
2005-09-21	28	24	1	11	34	0	25.6	91	0	9	2005	Wednesday	Rainy	0	0	1	0	0	0	1	0
2005-09-22	34	31	1.5	10.5	41.5	0	27.3	85	0	9	2005	Thursday	Rainy	0	0	0	1	0	0	1	0
2005-09-23	44	32.5	1.5	11.5	55.5	0.5	26.6	85	3.3	9	2005	Friday	Rainy	0	0	0	0	1	0	1	0
2005-09-24	40	22	1.5	10.5	45.5	0.5	26.3	88	0	9	2005	Saturday	Rainy	0	0	0	0	0	1	1	0
2005-09-25	34	31.5	1.5	11.5	35	0.5	27.3	85	0	9	2005	Sunday	Rainy	0	0	0	0	0	0	1	0
2005-09-26	28	40.5	1.5	12.5	32.5	0.5	27.9	84	0	9	2005	Monday	Rainy	1	0	0	0	0	0	1	0
2005-09-27	46	41	1.5	13	42.5	0.5	27.5	86	15.7	9	2005	Tuesday	Rainy	0	1	0	0	0	0	1	0
2005-09-28	32	21.5	1.5	13	12	0.5	24.6	97	12.4	9	2005	Wednesday	Rainy	0	0	1	0	0	0	1	0
2005-09-29	28	21	1.5	12	20	0.5	25.1	91	18.2	9	2005	Thursday	Rainy	0	0	0	1	0	0	1	0
2005-09-30	23	24.5	1.5	12.5	33	0.5	24.6	92	2.2	9	2005	Friday	Rainy	0	0	0	0	1	0	1	0
2005-10-01	42	34	1.5	9.5	28.5	0.5	26.7	86	0	10	2005	Saturday	Rainy	0	0	0	0	0	1	1	0
2005-10-02	45	25.5	1.5	7.5	43.5	0.5	26.4	87	0	10	2005	Sunday	Rainy	0	0	0	0	0	0	1	0
2005-10-03	45	36.5	2	10.5	50	0.5	25	90	15.6	10	2005	Monday	Rainy	1	0	0	0	0	0	1	0
2005-10-04	33	31.5	1.5	10	33.5	0.5	25.8	87	0	10	2005	Tuesday	Rainy	0	1	0	0	0	0	1	0
2005-10-05	31	35.5	1.5	9.5	39	0.5	27	84	0	10	2005	Wednesday	Rainy	0	0	1	0	0	0	1	0
2005-10-06	28	44	1.5	10	63	0.5	26.5	83	0	10	2005	Thursday	Rainy	0	0	0	1	0	0	1	0
2005-10-07	38	47.5	1.5	12.5	53	0.5	26	87	1	10	2005	Friday	Rainy	0	0	0	0	1	0	1	0
2005-10-08	24	40.5	2	10	25	0.5	26.6	85	3.5	10	2005	Saturday	Rainy	0	0	0	0	0	1	1	0
2005-10-09	40	39	1.5	7	25.5	0.5	26	79	0	10	2005	Sunday	Rainy	0	0	0	0	0	0	1	0
2005-10-10	36	44.5	1.5	9	30	0.5	26.2	80	0	10	2005	Monday	Rainy	1	0	0	0	0	0	1	0
2005-10-11	34	40	1.5	8.5	31.5	0.5	26.2	78	0	10	2005	Tuesday	Rainy	0	1	0	0	0	0	1	0
2005-10-12	41	45.5	1.5	11	39	0.5	26.1	80	0	10	2005	Wednesday	Rainy	0	0	1	0	0	0	1	0
2005-10-13	24	36.5	1.5	8	32	0.5	26.5	84	2.3	10	2005	Thursday	Rainy	0	0	0	1	0	0	1	0
2005-10-14	31	29	1.5	9	45.5	0.5	26.2	90	1.1	10	2005	Friday	Rainy	0	0	0	0	1	0	1	0
2005-10-15	34	35	1.5	10.5	42	0.5	26.8	84	0	10	2005	Saturday	Winter	0	0	0	0	0	1	0	0
2005-10-16	34	41.5	1.5	11	43.5	0.5	27	81	0	10	2005	Sunday	Winter	0	0	0	0	0	0	0	0
2005-10-17	35	48.5	2	12	50.5	0.5	26.5	80	0	10	2005	Monday	Winter	1	0	0	0	0	0	0	0
2005-10-18	33	48	2	12.5	59.5	0.5	25.4	81	0	10	2005	Tuesday	Winter	0	1	0	0	0	0	0	0
2005-10-19	30	46	1.5	9.5	43.5	0.5	25.8	83	17.6	10	2005	Wednesday	Winter	0	0	1	0	0	0	0	0
2005-10-20	30	55.5	2	13	41.5	0.5	25.4	83	0	10	2005	Thursday	Winter	0	0	0	1	0	0	0	0
2005-10-21	36	50.5	1.5	10.5	34	0.5	26.1	80	0	10	2005	Friday	Winter	0	0	0	0	1	0	0	0
2005-10-22	28	55.5	1.5	11	34.5	0.5	25.8	80	0	10	2005	Saturday	Winter	0	0	0	0	0	1	0	0
2005-10-23	25	61.5	1.5	11	44	0.5	25.8	79	0	10	2005	Sunday	Winter	0	0	0	0	0	0	0	0
2005-10-24	37	64.5	1.5	10.5	60	0.5	25.9	83	2.7	10	2005	Monday	Winter	1	0	0	0	0	0	0	0
2005-10-25	51	50	1.5	10.5	54	0.5	25.6	86	0	10	2005	Tuesday	Winter	0	1	0	0	0	0	0	0
2005-10-26	42	41.5	1.5	9.5	47.5	0.5	26.4	83	2.4	10	2005	Wednesday	Winter	0	0	1	0	0	0	0	0
2005-10-27	40	42	2	13	48	0.5	25.9	88	0.7	10	2005	Thursday	Winter	0	0	0	1	0	0	0	0
2005-10-28	29	37	2	11.5	53.5	0.5	26.6	83	8.3	10	2005	Friday	Winter	0	0	0	0	1	0	0	0
2005-10-29	39	37.5	1.5	6	44	0.5	26.1	87	60.3	10	2005	Saturday	Winter	0	0	0	0	0	1	0	0
2005-10-30	30	19	1.5	4.5	23.5	0.5	24	96	39.7	10	2005	Sunday	Winter	0	0	0	0	0	0	0	0
2005-10-31	29	25.5	1.5	9	29	0.5	22.9	95	36.8	10	2005	Monday	Winter	1	0	0	0	0	0	0	0
2005-11-01	44	38	1.5	6	17.5	0.5	22.9	91	0	11	2005	Tuesday	Winter	0	1	0	0	0	0	0	0
2005-11-02	21	31.5	1	7	18	0.5	24.5	86	0	11	2005	Wednesday	Winter	0	0	1	0	0	0	0	0
2005-11-03	30	33.5	1.5	10.5	24.5	0.5	25.6	85	0	11	2005	Thursday	Winter	0	0	0	1	0	0	0	0
2005-11-04	26	32.5	1.5	11	23	0.5	25.5	87	0	11	2005	Friday	Winter	0	0	0	0	1	0	0	0
2005-11-05	40	39.5	1.5	12	39	0.5	24.8	90	0	11	2005	Saturday	Winter	0	0	0	0	0	1	0	0
2005-11-06	48	32.5	1	9.5	35.5	0.5	26.2	86	0	11	2005	Sunday	Winter	0	0	0	0	0	0	0	0
2005-11-07	33	28	1	8.5	36.5	0.5	26.4	86	6	11	2005	Monday	Winter	1	0	0	0	0	0	0	0
2005-11-08	17	33	1	10	37	0.5	25.6	87	0	11	2005	Tuesday	Winter	0	1	0	0	0	0	0	0
2005-11-09	46	30.5	1	9.5	23.5	0.5	25	93	3.8	11	2005	Wednesday	Winter	0	0	1	0	0	0	0	0
2005-11-10	26	38.5	1.5	9.5	21.5	0.5	24.6	92	4.3	11	2005	Thursday	Winter	0	0	0	1	0	0	0	0
2005-11-11	42	32	1	8.5	16	0.5	26.5	86	8.6	11	2005	Friday	Winter	0	0	0	0	1	0	0	0
2005-11-12	27	29.5	1	9	21	0.5	26.7	82	0	11	2005	Saturday	Winter	0	0	0	0	0	1	0	0
2005-11-13	22	28.5	1	9	45.5	0.5	26.5	82	0	11	2005	Sunday	Winter	0	0	0	0	0	0	0	0
2005-11-14	37	34	1	10	35.5	0.5	25.4	83	0	11	2005	Monday	Winter	1	0	0	0	0	0	0	0
2005-11-15	26	39	1.5	11	36.5	0.5	25.4	80	0	11	2005	Tuesday	Winter	0	1	0	0	0	0	0	0
2005-11-16	34	45	1	9	37.5	0.5	24.9	85	0	11	2005	Wednesday	Winter	0	0	1	0	0	0	0	0
2005-11-17	33	43.5	1	8	30.5	0.5	26	84	0	11	2005	Thursday	Winter	0	0	0	1	0	0	0	0
2005-11-18	41	38.5	0.5	9.5	36.5	0.5	25.5	84	0.1	11	2005	Friday	Winter	0	0	0	0	1	0	0	0
2005-11-19	31	38	1	10	60.5	0.5	24.9	84	0	11	2005	Saturday	Winter	0	0	0	0	0	1	0	0
2005-11-20	34	35.5	1	10	48	0.5	24.7	80	0	11	2005	Sunday	Winter	0	0	0	0	0	0	0	0
2005-11-21	31	31	0.5	9.5	22.5	0.5	23.1	82	0	11	2005	Monday	Winter	1	0	0	0	0	0	0	0
2005-11-22	24	29	0.5	8	32	0.5	23	78	0	11	2005	Tuesday	Winter	0	1	0	0	0	0	0	0
2005-11-23	34	40	0.5	12	45	0.5	21.3	81	0	11	2005	Wednesday	Winter	0	0	1	0	0	0	0	0
2005-11-24	48	40.5	0.5	11.5	28	0.5	21.4	81	0	11	2005	Thursday	Winter	0	0	0	1	0	0	0	0
2005-11-25	38	54	1.5	16	33	1	21.7	81	0	11	2005	Friday	Winter	0	0	0	0	1	0	0	0
2005-11-26	38	50	1.5	13.5	39.5	1	22.9	79	0	11	2005	Saturday	Winter	0	0	0	0	0	1	0	0
2005-11-27	35	44.5	1.5	11.5	60.5	1	24.2	79	0	11	2005	Sunday	Winter	0	0	0	0	0	0	0	0
2005-11-28	39	45	1	12	51	1	23.7	81	0	11	2005	Monday	Winter	1	0	0	0	0	0	0	0
2005-11-29	37	43.5	1	13.5	43	1	23.9	79	0	11	2005	Tuesday	Winter	0	1	0	0	0	0	0	0
2005-11-30	34	49	1.5	13	51.5	1.5	23.6	80	0	11	2005	Wednesday	Winter	0	0	1	0	0	0	0	0
2005-12-01	38	49	1.5	15	54	1.5	24.5	80	0	12	2005	Thursday	Winter	0	0	0	1	0	0	0	0
2005-12-02	28	44.5	1.5	14	55.5	1	23.6	79	0	12	2005	Friday	Winter	0	0	0	0	1	0	0	0
2005-12-03	36	45.5	1	12.5	60	1	23.1	81	0	12	2005	Saturday	Winter	0	0	0	0	0	1	0	0
2005-12-04	33	43.5	2	11.5	53	1	24.4	80	0	12	2005	Sunday	Winter	0	0	0	0	0	0	0	0
2005-12-05	31	43.5	1.5	9.5	38	1	25.3	85	11.6	12	2005	Monday	Winter	1	0	0	0	0	0	0	0
2005-12-06	36	22	1	9.5	31.5	1	23.8	92	6.8	12	2005	Tuesday	Winter	0	1	0	0	0	0	0	0
2005-12-07	32	33.5	1.5	12	22.5	1	22.3	94	2.6	12	2005	Wednesday	Winter	0	0	1	0	0	0	0	0
2005-12-08	38	41.5	2	13	34.5	1.5	22.3	89	0	12	2005	Thursday	Winter	0	0	0	1	0	0	0	0
2005-12-09	25	39	1	11.5	46	1	22.9	85	0	12	2005	Friday	Winter	0	0	0	0	1	0	0	0
2005-12-10	32	46.5	2	14	70	1	23.7	87	0	12	2005	Saturday	Winter	0	0	0	0	0	1	0	0
2005-12-11	23	39	1.5	11	48.5	1	24.3	84	0	12	2005	Sunday	Winter	0	0	0	0	0	0	0	0
2005-12-12	29	36.5	1	9.5	27.5	1	24.5	84	0	12	2005	Monday	Winter	1	0	0	0	0	0	0	0
2005-12-13	29	37.5	1	10.5	25.5	1	23.6	84	0	12	2005	Tuesday	Winter	0	1	0	0	0	0	0	0
2005-12-14	30	39	1	7.5	23	1	23	79	0	12	2005	Wednesday	Winter	0	0	1	0	0	0	0	0
2005-12-15	39	25	1	6	29.5	1	22.2	66	0	12	2005	Thursday	Winter	0	0	0	1	0	0	0	0
2005-12-16	31	40.5	1.5	9.5	31	1	20	73	0	12	2005	Friday	Winter	0	0	0	0	1	0	0	0
2005-12-17	34	41	1	6.5	27	1	20.4	75	0	12	2005	Saturday	Winter	0	0	0	0	0	1	0	0
2005-12-18	32	53	1.5	9	34.5	1	21.1	67	0	12	2005	Sunday	Winter	0	0	0	0	0	0	0	0
2005-12-19	36	68.5	1.5	11.5	32.5	1	19.1	76	0	12	2005	Monday	Winter	1	0	0	0	0	0	0	0
2005-12-20	37	69.5	2	11	41.5	1	18.3	79	0	12	2005	Tuesday	Winter	0	1	0	0	0	0	0	0
2005-12-21	38	68.5	2	9.5	33	1	19.3	77	0	12	2005	Wednesday	Winter	0	0	1	0	0	0	0	0
2005-12-22	39	78	4.5	9	44	1	20.2	61	0	12	2005	Thursday	Winter	0	0	0	1	0	0	0	0
2005-12-23	31	89	4	12	40.5	1	19	63	0	12	2005	Friday	Winter	0	0	0	0	1	0	0	0
2005-12-24	31	93	3	15	57	1	19.9	75	0	12	2005	Saturday	Winter	0	0	0	0	0	1	0	0
2005-12-25	38	95.5	1.5	12.5	46.5	1	21	81	5.3	12	2005	Sunday	Winter	0	0	0	0	0	0	0	0
2005-12-26	47	81.5	1.5	18	33.5	1.5	20.1	96	1.6	12	2005	Monday	Winter	1	0	0	0	0	0	0	0
2005-12-27	40	39	1.5	12.5	28	1	22.6	81	0	12	2005	Tuesday	Winter	0	1	0	0	0	0	0	0
2005-12-28	22	27.5	1	10	33	1	20.6	76	0	12	2005	Wednesday	Winter	0	0	1	0	0	0	0	0
2005-12-29	30	36	1	14	47.5	1	19.7	80	0	12	2005	Thursday	Winter	0	0	0	1	0	0	0	0
2005-12-30	17	39.5	1	15	40	1	20.7	78	0	12	2005	Friday	Winter	0	0	0	0	1	0	0	0
2005-12-31	3	42	1	12	32	1	20.8	78	0	12	2005	Saturday	Winter	0	0	0	0	0	1	0	0
2006-01-01	48	39	1	12.5	39.5	1	20.7	80	0	1	2006	Sunday	Winter	0	0	0	0	0	0	0	0
2006-01-02	48	30	1.5	11	35.5	1	20.7	81	0	1	2006	Monday	Winter	1	0	0	0	0	0	0	0
2006-01-03	36	30	1	12	42	1	20.4	80	0	1	2006	Tuesday	Winter	0	1	0	0	0	0	0	0
2006-01-04	37	30	1.5	14.5	44.5	1	20.5	80	0	1	2006	Wednesday	Winter	0	0	1	0	0	0	0	0
2006-01-05	42	36.5	1.5	13.5	32	1	20.4	75	0	1	2006	Thursday	Winter	0	0	0	1	0	0	0	0
2006-01-06	37	50	2	15.5	63	1	20.9	79	0	1	2006	Friday	Winter	0	0	0	0	1	0	0	0
2006-01-07	42	65	1	17.5	55.5	1	22.9	82	0	1	2006	Saturday	Winter	0	0	0	0	0	1	0	0
2006-01-08	34	69.5	1.5	18	54	1.5	23.9	77	0	1	2006	Sunday	Winter	0	0	0	0	0	0	0	0
2006-01-09	35	63	1.5	18	51.5	1.5	23.3	76	0	1	2006	Monday	Winter	1	0	0	0	0	0	0	0
2006-01-10	32	67	1.5	17.5	63.5	1	21.6	80	0	1	2006	Tuesday	Winter	0	1	0	0	0	0	0	0
2006-01-11	36	62	1.5	17.5	59	1	21.8	79	0	1	2006	Wednesday	Winter	0	0	1	0	0	0	0	0
2006-01-12	36	67	2	20	62.5	1	21.4	80	0	1	2006	Thursday	Winter	0	0	0	1	0	0	0	0
2006-01-13	38	57	1.5	19	74.5	0.5	21.4	76	0	1	2006	Friday	Winter	0	0	0	0	1	0	0	0
2006-01-14	31	42.5	1.5	16.5	58.5	0.5	20.3	73	0	1	2006	Saturday	Winter	0	0	0	0	0	1	0	0
2006-01-15	36	42	1	16	49.5	0.5	19.2	70	0	1	2006	Sunday	Winter	0	0	0	0	0	0	0	0
2006-01-16	39	53	1.5	19	82	0.5	19	73	0	1	2006	Monday	Winter	1	0	0	0	0	0	0	0
2006-01-17	31	53.5	2	18.5	63	0.5	19.3	73	0	1	2006	Tuesday	Winter	0	1	0	0	0	0	0	0
2006-01-18	41	54	1.5	19	70	0.5	20.4	72	0	1	2006	Wednesday	Winter	0	0	1	0	0	0	0	0
2006-01-19	36	61	2	21	59	0.5	20.5	74	0	1	2006	Thursday	Winter	0	0	0	1	0	0	0	0
2006-01-20	49	56	2	19.5	75.5	0.5	20.9	72	0	1	2006	Friday	Winter	0	0	0	0	1	0	0	0
2006-01-21	41	54.5	2	20	92	0.5	20.6	70	0	1	2006	Saturday	Winter	0	0	0	0	0	1	0	0
2006-01-22	51	46	1	16.5	56.5	0.5	20.6	69	0	1	2006	Sunday	Winter	0	0	0	0	0	0	0	0
2006-01-23	55	69.5	2.5	20	64.5	0.5	21.2	74	0	1	2006	Monday	Winter	1	0	0	0	0	0	0	0
2006-01-24	42	90	2	23	56.5	1.5	22.9	77	0	1	2006	Tuesday	Winter	0	1	0	0	0	0	0	0
2006-01-25	41	84.5	2	20.5	65.5	1	22.9	77	0	1	2006	Wednesday	Winter	0	0	1	0	0	0	0	0
2006-01-26	29	87	2	23.5	64	1.5	22.5	74	0	1	2006	Thursday	Winter	0	0	0	1	0	0	0	0
2006-01-27	48	63	1.5	20.5	59	1	21.8	73	0	1	2006	Friday	Winter	0	0	0	0	1	0	0	0
2006-01-28	31	57.5	1.5	18.5	58.5	0.5	21.3	74	0	1	2006	Saturday	Winter	0	0	0	0	0	1	0	0
2006-01-29	31	56.5	2	18.5	71	0.5	21.1	73	0	1	2006	Sunday	Winter	0	0	0	0	0	0	0	0
2006-01-30	39	61	2	19.5	62.5	1	21.8	69	0	1	2006	Monday	Winter	1	0	0	0	0	0	0	0
2006-01-31	36	75.5	1.5	22	77	0.5	21.9	71	0	1	2006	Tuesday	Winter	0	1	0	0	0	0	0	0
2006-02-01	46	73.5	2	19	76	0.5	22.9	71	0	2	2006	Wednesday	Winter	0	0	1	0	0	0	0	0
2006-02-02	35	61.5	1.5	19	60.5	1.5	23.5	70	0	2	2006	Thursday	Winter	0	0	0	1	0	0	0	0
2006-02-03	35	53.5	1	25	54	1	23.4	67	0	2	2006	Friday	Winter	0	0	0	0	1	0	0	0
2006-02-04	40	83.5	2	29	66.5	1.5	24.1	70	0	2	2006	Saturday	Winter	0	0	0	0	0	1	0	0
2006-02-05	28	83.5	1.5	23	61.5	1	25.2	67	0	2	2006	Sunday	Winter	0	0	0	0	0	0	0	0
2006-02-06	38	63.5	1.5	20	71	1	23.3	75	4.06667	2	2006	Monday	Winter	1	0	0	0	0	0	0	0
2006-02-07	32	48	1.5	18	52	1	23.1	74	0	2	2006	Tuesday	Winter	0	1	0	0	0	0	0	0
2006-02-08	37	52.5	1.5	20	64	1	22.9	73	0	2	2006	Wednesday	Winter	0	0	1	0	0	0	0	0
2006-02-09	33	62	1.5		58	1.5	22.8	75	1.03333	2	2006	Thursday	Winter	0	0	0	1	0	0	0	0
2006-02-10	30	53	1	19	64	1	23.1	72	0	2	2006	Friday	Winter	0	0	0	0	1	0	0	0
2006-02-11	34	58	0.5	14.5	54.5	1	23.5	70	4.53333	2	2006	Saturday	Winter	0	0	0	0	0	1	0	0
2006-02-12	36	43	0.5	10	32.5	1	24.3	59	0	2	2006	Sunday	Winter	0	0	0	0	0	0	0	0
2006-02-13	35	57	0.5	14.5	47	1	24.4	66	0	2	2006	Monday	Winter	1	0	0	0	0	0	0	0
2006-02-14	46	62.5	0.5	18.5	53.5	1	24.2	66	0	2	2006	Tuesday	Winter	0	1	0	0	0	0	0	0
2006-02-15	41	53.5	0.5	20	49	1	23.2	63	0	2	2006	Wednesday	Summer	0	0	1	0	0	0	0	1
2006-02-16	39	60.5	0.5	22.5	54.5	1	23	61	0	2	2006	Thursday	Summer	0	0	0	1	0	0	0	1
2006-02-17	34	50	0	19.5	37.5	1	23.8	56	0	2	2006	Friday	Summer	0	0	0	0	1	0	0	1
2006-02-18	34	58	1	15	44.5	0.5	25.7	59	0	2	2006	Saturday	Summer	0	0	0	0	0	1	0	1
2006-02-19	41	62	1	14	54	0.5	25.3	60	0	2	2006	Sunday	Summer	0	0	0	0	0	0	0	1
2006-02-20	35	65.5	1.5	12	62	0.5	26.3	63	0	2	2006	Monday	Summer	1	0	0	0	0	0	0	1
2006-02-21	33	63	1.5	13	57.5	0.5	26.2	64	0	2	2006	Tuesday	Summer	0	1	0	0	0	0	0	1
2006-02-22	23	52	1	12	47	0.5	26.2	61	0.3	2	2006	Wednesday	Summer	0	0	1	0	0	0	0	1
2006-02-23	41	65.5	1.5	9.5	59	1	27.4	63	0	2	2006	Thursday	Summer	0	0	0	1	0	0	0	1
2006-02-24	37	74.5	1.5	13	51	1	28.8	61	0	2	2006	Friday	Summer	0	0	0	0	1	0	0	1
2006-02-25	37	63	1.5	14	55.5	1	27.6	58	0	2	2006	Saturday	Summer	0	0	0	0	0	1	0	1
2006-02-26	41	73.5	1.5	19	64	1	25.8	55	0	2	2006	Sunday	Summer	0	0	0	0	0	0	0	1
2006-02-27	43	93	1.5	19.5	63	1	25.5	58	0	2	2006	Monday	Summer	1	0	0	0	0	0	0	1
2006-02-28	27	100.5	1.5	22	69	1.5	25.6	59	0	2	2006	Tuesday	Summer	0	1	0	0	0	0	0	1
2006-03-01	44	110	1.5	19	65.5	1	26.8	60	0	3	2006	Wednesday	Summer	0	0	1	0	0	0	0	1
2006-03-02	35	84	1	15.5	60.5	1	27.4	63	0	3	2006	Thursday	Summer	0	0	0	1	0	0	0	1
2006-03-03	19	80	1	12	60	1	27.5	64	0	3	2006	Friday	Summer	0	0	0	0	1	0	0	1
2006-03-04	26	61	1	13.5	48	1	26.7	59	0	3	2006	Saturday	Summer	0	0	0	0	0	1	0	1
2006-03-05	33	60	1	11	52.5	0.5	26.7	57	0	3	2006	Sunday	Summer	0	0	0	0	0	0	0	1
2006-03-06	42	72	1	13	62.5	0.5	28	56	0	3	2006	Monday	Summer	1	0	0	0	0	0	0	1
2006-03-07	31	80	1	15	72.5	1	27.4	59	0	3	2006	Tuesday	Summer	0	1	0	0	0	0	0	1
2006-03-08	28	81.5	0	14.5	60.5	0	28.5	54	0	3	2006	Wednesday	Summer	0	0	1	0	0	0	0	1
2006-03-09	38	124.5	1	18.5	83	1	28.1	54	0	3	2006	Thursday	Summer	0	0	0	1	0	0	0	1
2006-03-10	48	118.5	2	21	94.5	1	28.2	55	0	3	2006	Friday	Summer	0	0	0	0	1	0	0	1
2006-03-11	44	119	1.5	20	70.5	1.5	27.6	56	0	3	2006	Saturday	Summer	0	0	0	0	0	1	0	1
2006-03-12	36	93.5	1	21.5	71	1.5	28.1	54	0	3	2006	Sunday	Summer	0	0	0	0	0	0	0	1
2006-03-13	41	91.5	1.5	20	72	0.5	28	51	0	3	2006	Monday	Summer	1	0	0	0	0	0	0	1
2006-03-14	31	86.5	1	13.5	56.5	1	28	57	0	3	2006	Tuesday	Summer	0	1	0	0	0	0	0	1
2006-03-15	36	70.5	0	13.5	52	1	28.5	64	0	3	2006	Wednesday	Summer	0	0	1	0	0	0	0	1
2006-03-16	27	81.5	0	16	62	1	28.3	58	0	3	2006	Thursday	Summer	0	0	0	1	0	0	0	1
2006-03-17	35	110	1	21.5	77.5	1.5	28.1	50	0	3	2006	Friday	Summer	0	0	0	0	1	0	0	1
2006-03-18	25	121.5	1	23	85.5	1.5	27.8	49	0	3	2006	Saturday	Summer	0	0	0	0	0	1	0	1
2006-03-19	45	243	2.5	31	99	2	27.3	51	0	3	2006	Sunday	Summer	0	0	0	0	0	0	0	1
2006-03-20	48	152	1	21	72	1.5	28.8	55	0	3	2006	Monday	Summer	1	0	0	0	0	0	0	1
2006-03-21	43	85.5	0.5	18	54	1	29.2	56	0	3	2006	Tuesday	Summer	0	1	0	0	0	0	0	1
2006-03-22	41	80	0	14	58.5	1	29.4	47	0	3	2006	Wednesday	Summer	0	0	1	0	0	0	0	1
2006-03-23	47	156.5	1	24	89	1.5	27.1	48	0	3	2006	Thursday	Summer	0	0	0	1	0	0	0	1
2006-03-24	33	189.5	1.5	28	82	2	26.5	52	0	3	2006	Friday	Summer	0	0	0	0	1	0	0	1
2006-03-25	37	147	1	21	75	1.5	28.5	48	0	3	2006	Saturday	Summer	0	0	0	0	0	1	0	1
2006-03-26	30	113.5	1	19.5	73.5	1	29.3	45	0	3	2006	Sunday	Summer	0	0	0	0	0	0	0	1
2006-03-27	33	112	1.5	22	73	1.5	29	49	0	3	2006	Monday	Summer	1	0	0	0	0	0	0	1
2006-03-28	55	150	1.5	18.5	87.5	1.5	29.6	50	0	3	2006	Tuesday	Summer	0	1	0	0	0	0	0	1
2006-03-29	29	101.5	0.5	14	47.5	1	27.5	66	12.8	3	2006	Wednesday	Summer	0	0	1	0	0	0	0	1
2006-03-30	26	44.5	0	13.5	40	1	24.8	82	4.96667	3	2006	Thursday	Summer	0	0	0	1	0	0	0	1
2006-03-31	35	48.5	1	16	52.5	1	23.5	80	0	3	2006	Friday	Summer	0	0	0	0	1	0	0	1
2006-04-01	25	57	0.5	17.5	57	1	25.6	73	0	4	2006	Saturday	Summer	0	0	0	0	0	1	0	1
2006-04-02	32	73	1	19	68.5	1.5	27.3	61	0	4	2006	Sunday	Summer	0	0	0	0	0	0	0	1
2006-04-03	45	76	1	19	58	1	28.3	56	0	4	2006	Monday	Summer	1	0	0	0	0	0	0	1
2006-04-04	37	69	1.5	18	64	1	29.3	56	0	4	2006	Tuesday	Summer	0	1	0	0	0	0	0	1
2006-04-05	37	69.5	1	19	64.5	1	28.9	54	0	4	2006	Wednesday	Summer	0	0	1	0	0	0	0	1
2006-04-06	39	75	1.5	19	71.5	1	29.8	50	0	4	2006	Thursday	Summer	0	0	0	1	0	0	0	1
2006-04-07	40	81.5	1	15	86.5	1	30.9	53	0.566667	4	2006	Friday	Summer	0	0	0	0	1	0	0	1
2006-04-08	38	62	1	12	57.5	0.5	28.2	68	1.36667	4	2006	Saturday	Summer	0	0	0	0	0	1	0	1
2006-04-09	36	73.5	1	17.5	50.5	1.5	28	70	1.3	4	2006	Sunday	Summer	0	0	0	0	0	0	0	1
2006-04-10	35	84.5	1.5	20.5	68	1.5	29.6	61	0	4	2006	Monday	Summer	1	0	0	0	0	0	0	1
2006-04-11	35	109	1.5	21.5	73	1.5	30.6	52	0	4	2006	Tuesday	Summer	0	1	0	0	0	0	0	1
2006-04-12	34	110.5	1.5	22.5	64	1.5	31	54	0	4	2006	Wednesday	Summer	0	0	1	0	0	0	0	1
2006-04-13	38	103.5	1	15.5	72	1	31.7	53	0	4	2006	Thursday	Summer	0	0	0	1	0	0	0	1
2006-04-14	47	71	0	11.5	59.5	1	32	52	0.566667	4	2006	Friday	Summer	0	0	0	0	1	0	0	1
2006-04-15	38	38.5	0	6.5	43	0.5	30.2	62	5.86667	4	2006	Saturday	Summer	0	0	0	0	0	1	0	1
2006-04-16	44	26	0	10	39	0	27.1	76	11.6667	4	2006	Sunday	Summer	0	0	0	0	0	0	0	1
2006-04-17	40	26.5	0	9	41.5	1	25.9	79	0.333333	4	2006	Monday	Summer	1	0	0	0	0	0	0	1
2006-04-18	50	35.5	0	9	46.5	1	27.5	75	1.2	4	2006	Tuesday	Summer	0	1	0	0	0	0	0	1
2006-04-19	29	28	0	5.5	50	0.5	28.4	74	2.7	4	2006	Wednesday	Summer	0	0	1	0	0	0	0	1
2006-04-20	36	25	0.5	6.5	37	0.5	27.7	76	4.95	4	2006	Thursday	Summer	0	0	0	1	0	0	0	1
2006-04-21	17	31.5	0.5	9	49	0.5	29.4	70	7.06667	4	2006	Friday	Summer	0	0	0	0	1	0	0	1
2006-04-22	27	35	0.5	7	41.5	1	27.9	73	0	4	2006	Saturday	Summer	0	0	0	0	0	1	0	1
2006-04-23	27	33.5	0.5	8	58.5	1	29.6	65	0	4	2006	Sunday	Summer	0	0	0	0	0	0	0	1
2006-04-24	33	33.5	0	6	43.5	1	29.9	64	0	4	2006	Monday	Summer	1	0	0	0	0	0	0	1
2006-04-25	33	26.5	0	5	38.5	1	28.2	74	28.0333	4	2006	Tuesday	Summer	0	1	0	0	0	0	0	1
2006-04-26	43	32	0	4	41.5	1	27.2	79	2.63333	4	2006	Wednesday	Summer	0	0	1	0	0	0	0	1
2006-04-27	23	24.5	0.5	10.5	45.5	0.5	27.7	80	27	4	2006	Thursday	Summer	0	0	0	1	0	0	0	1
2006-04-28	40	20	0.5	10	35	0.5	26.2	87	29.9333	4	2006	Friday	Summer	0	0	0	0	1	0	0	1
2006-04-29	20	21	0.5	7.5	29.5	0.5	23.8	89	28.2	4	2006	Saturday	Summer	0	0	0	0	0	1	0	1
2006-04-30	44	23	0.5	12	26	0.5	25.3	83	2.23333	4	2006	Sunday	Summer	0	0	0	0	0	0	0	1
2006-05-01	31	31	0.5	15	46	1	27.8	73	0	5	2006	Monday	Summer	1	0	0	0	0	0	0	1
2006-05-02	38	36.5	0.5	14	54	1	28.2	73	0	5	2006	Tuesday	Summer	0	1	0	0	0	0	0	1
2006-05-03	37	38	0.5	13.5	64	1	29.2	70	7.2	5	2006	Wednesday	Summer	0	0	1	0	0	0	0	1
2006-05-04	40	36.5	1	13	51	1	29.8	69	0	5	2006	Thursday	Summer	0	0	0	1	0	0	0	1
2006-05-05	31	42.5	0.5	12	54.5	1	30.2	68	12.4	5	2006	Friday	Summer	0	0	0	0	1	0	0	1
2006-05-06	36	38.5	0.5	11	48.5	1	29	71	1.2	5	2006	Saturday	Summer	0	0	0	0	0	1	0	1
2006-05-07	38	34.5	0.5	10	54	0.5	30.1	67	9.73333	5	2006	Sunday	Summer	0	0	0	0	0	0	0	1
2006-05-08	36	30.5	0.5	10.5	52	1	27.8	79	12.4667	5	2006	Monday	Summer	1	0	0	0	0	0	0	1
2006-05-09	29	32	0.5	11	45	1	27.3	84	0.233333	5	2006	Tuesday	Summer	0	1	0	0	0	0	0	1
2006-05-10	27	26.5	0.5	10	42	0.5	27.6	80	2.9	5	2006	Wednesday	Summer	0	0	1	0	0	0	0	1
2006-05-11	32	23	0.5	9.5	32.5	1	25.9	88	3.9	5	2006	Thursday	Summer	0	0	0	1	0	0	0	1
2006-05-12	36	24.5	0.5	8.5	32	1	28.3	74	9.13333	5	2006	Friday	Summer	0	0	0	0	1	0	0	1
2006-05-13	25	27	0.5	9	51	1	29.6	67	0	5	2006	Saturday	Summer	0	0	0	0	0	1	0	1
2006-05-14	33	24	0.5	8.5	38	1	26.3	86	73.9333	5	2006	Sunday	Summer	0	0	0	0	0	0	0	1
2006-05-15	34	22	0.5	6.5	23.5	1	21.3	87	2.23333	5	2006	Monday	Rainy	1	0	0	0	0	0	1	0
2006-05-16	35	20	0.5	9	28	1	20.8	87	1.46667	5	2006	Tuesday	Rainy	0	1	0	0	0	0	1	0
2006-05-17	35	30	0.5	11	26.5	1	22.9	89	0.9	5	2006	Wednesday	Rainy	0	0	1	0	0	0	1	0
2006-05-18	36	29.5	0.5	12	25	1	22.4	95	4.4	5	2006	Thursday	Rainy	0	0	0	1	0	0	1	0
2006-05-19	26	30	0.5	10	43.5	1	24.5	89	0	5	2006	Friday	Rainy	0	0	0	0	1	0	1	0
2006-05-20	37	36.5	0.5	10.5	41	1	23.9	86	0.0333333	5	2006	Saturday	Rainy	0	0	0	0	0	1	1	0
2006-05-21	31	29.5	0.5	9	35	1	25	90	14.1667	5	2006	Sunday	Rainy	0	0	0	0	0	0	1	0
2006-05-22	31	17	0.5	8.5	30.5	1	24.5	93	12.3333	5	2006	Monday	Rainy	1	0	0	0	0	0	1	0
2006-05-23	32	19.5	0.5	8	40.5	1	26.7	85	21.8667	5	2006	Tuesday	Rainy	0	1	0	0	0	0	1	0
2006-05-24	34	25.5	0.5	17	36	1	23.9	97	32	5	2006	Wednesday	Rainy	0	0	1	0	0	0	1	0
2006-05-25	25	24	0.5	8.5	30	0	26.1	90	1.85	5	2006	Thursday	Rainy	0	0	0	1	0	0	1	0
2006-05-26	37	37.5	1	10	28	0.5	28.1	78	0	5	2006	Friday	Rainy	0	0	0	0	1	0	1	0
2006-05-27	35	29.5	1.5	9.5	27.5	0.5	28	81	0.266667	5	2006	Saturday	Rainy	0	0	0	0	0	1	1	0
2006-05-28	38	24.5	1.5	8.5	40.5	0.5	27.9	81	0	5	2006	Sunday	Rainy	0	0	0	0	0	0	1	0
2006-05-29	31	22	1	9	30.5	0.5	28.3	78	3.1	5	2006	Monday	Rainy	1	0	0	0	0	0	1	0
2006-05-30	40	21.5	1	9.5	24.5	0.5	25.6	90	13.8667	5	2006	Tuesday	Rainy	0	1	0	0	0	0	1	0
2006-05-31	27	21.5	0.5	10	22.5	0.5	25.7	91	2.06667	5	2006	Wednesday	Rainy	0	0	1	0	0	0	1	0
2006-06-01	34	29.5	1.5	11.5	24	0.5	26.6	87	1.86667	6	2006	Thursday	Rainy	0	0	0	1	0	0	1	0
2006-06-02	36	20.5	0.5	10	23.5	0.5	27.1	86	36.9	6	2006	Friday	Rainy	0	0	0	0	1	0	1	0
2006-06-03	34	19	0.5	9	23	0.5	25.8	92	6.4	6	2006	Saturday	Rainy	0	0	0	0	0	1	1	0
2006-06-04	30	19.5	0.5	8.5	25	0.5	27.4	85	1.16667	6	2006	Sunday	Rainy	0	0	0	0	0	0	1	0
2006-06-05	27	23	1	9	21	0.5	26.6	83	3.56667	6	2006	Monday	Rainy	1	0	0	0	0	0	1	0
2006-06-06	42	25.5	1	9.5	21	0.5	27.1	81	3.3	6	2006	Tuesday	Rainy	0	1	0	0	0	0	1	0
2006-06-07	28	21.5	0.5	8.5	27	0.5	28.3	80	2.73333	6	2006	Wednesday	Rainy	0	0	1	0	0	0	1	0
2006-06-08	26	21	1	8	29	0.5	28.1	78	0	6	2006	Thursday	Rainy	0	0	0	1	0	0	1	0
2006-06-09	33	27.5	1	7.5	29.5	0.5	27.9	78	2.7	6	2006	Friday	Rainy	0	0	0	0	1	0	1	0
2006-06-10	37	28	1	8	33	0.5	28.1	77	3	6	2006	Saturday	Rainy	0	0	0	0	0	1	1	0
2006-06-11	30	23.5	1	8	36.5	0.5	28.1	80	0.633333	6	2006	Sunday	Rainy	0	0	0	0	0	0	1	0
2006-06-12	38	34	0.5	8.5	28	0.5	27.6	85	1.43333	6	2006	Monday	Rainy	1	0	0	0	0	0	1	0
2006-06-13	48	43	0.5	11	19.5	0.5	27.4	84	1.65	6	2006	Tuesday	Rainy	0	1	0	0	0	0	1	0
2006-06-14	24	46.5	0	7.5	45	0	29.4	76	0	6	2006	Wednesday	Rainy	0	0	1	0	0	0	1	0
2006-06-15	25	37.5	0.5	9	42.5	1	28.7	80	0.133333	6	2006	Thursday	Rainy	0	0	0	1	0	0	1	0
2006-06-16	33	38	1	10	38.5	0.5	29.3	78	3.33333	6	2006	Friday	Rainy	0	0	0	0	1	0	1	0
2006-06-17	25	34	1	8	43	0.5	28	85	0.566667	6	2006	Saturday	Rainy	0	0	0	0	0	1	1	0
2006-06-18	28	32.5	0.5	6.5	45	0.5	28.5	84	5.56667	6	2006	Sunday	Rainy	0	0	0	0	0	0	1	0
2006-06-19	25	21	0	6	26.5	1	26.8	89	32.7	6	2006	Monday	Rainy	1	0	0	0	0	0	1	0
2006-06-20	30	17.5	0.5	7.5	36.5	1	26.1	92	31.1	6	2006	Tuesday	Rainy	0	1	0	0	0	0	1	0
2006-06-21	28	23.5	0.5	8	38.5	0.5	27	89	2.16667	6	2006	Wednesday	Rainy	0	0	1	0	0	0	1	0
2006-06-22	34	22.5	0.5	6	34	0.5	27.9	82	9.63333	6	2006	Thursday	Rainy	0	0	0	1	0	0	1	0
2006-06-23	40	27	0.5	6	32.5	0.5	27.9	84	9.26667	6	2006	Friday	Rainy	0	0	0	0	1	0	1	0
2006-06-24	42	27	0.5	7.5	45.5	0.5	27.6	83	0.4	6	2006	Saturday	Rainy	0	0	0	0	0	1	1	0
2006-06-25	28	19	0	5	41.5	0.5	27.9	81	3.4	6	2006	Sunday	Rainy	0	0	0	0	0	0	1	0
2006-06-26	24	24	0.5	6.5	35	0.5	27.6	85	17.6	6	2006	Monday	Rainy	1	0	0	0	0	0	1	0
2006-06-27	34	21	0.5	4.5	29.5	0.5	27.8	84	0.666667	6	2006	Tuesday	Rainy	0	1	0	0	0	0	1	0
2006-06-28	31	16.5	0.5	4.5	28	0.5	27.5	83	0.733333	6	2006	Wednesday	Rainy	0	0	1	0	0	0	1	0
2006-06-29	27	23.5	0.5	7	27	0.5	26.8	88	1.1	6	2006	Thursday	Rainy	0	0	0	1	0	0	1	0
2006-06-30	21	20	0.5	5	27.5	0.5	27.6	81	0	6	2006	Friday	Rainy	0	0	0	0	1	0	1	0
2006-07-01	31	21.5	0.5	5	34	0.5	26.7	85	11.6667	7	2006	Saturday	Rainy	0	0	0	0	0	1	1	0
2006-07-02	33	22	0	5	27.5	0.5	26.7	87	5.56667	7	2006	Sunday	Rainy	0	0	0	0	0	0	1	0
2006-07-03	34	32.5	0.5	6	33.5	1	27.6	82	0.533333	7	2006	Monday	Rainy	1	0	0	0	0	0	1	0
2006-07-04	33	30	1	7	34	0.5	27.6	85	5.2	7	2006	Tuesday	Rainy	0	1	0	0	0	0	1	0
2006-07-05	28	19	0.5	5	28.5	0.5	26.6	91	18.7	7	2006	Wednesday	Rainy	0	0	1	0	0	0	1	0
2006-07-06	18	21	1	10	16	0.5	24.7	97	11.5333	7	2006	Thursday	Rainy	0	0	0	1	0	0	1	0
2006-07-07	26	25.5	1	10.5	24	0.5	25.3	93	11.3667	7	2006	Friday	Rainy	0	0	0	0	1	0	1	0
2006-07-08	33	28.5	0	8.5	20	0.5	25.6	90	1.66667	7	2006	Saturday	Rainy	0	0	0	0	0	1	1	0
2006-07-09	45	26.5	0	9.5	26.5	1	26.5	88	1.25	7	2006	Sunday	Rainy	0	0	0	0	0	0	1	0
2006-07-10	42	25	0	6.5	30.5	0.5	27.5	85	4.83333	7	2006	Monday	Rainy	1	0	0	0	0	0	1	0
2006-07-11	30	26	0.5	5.5	45.5	0.5	27.4	85	0	7	2006	Tuesday	Rainy	0	1	0	0	0	0	1	0
2006-07-12	31	34.5	0.5	8.5	30.5	0.5	27.3	85	0.4	7	2006	Wednesday	Rainy	0	0	1	0	0	0	1	0
2006-07-13	28	32.5	0.5	9	27	0.5	26.6	88	6.43333	7	2006	Thursday	Rainy	0	0	0	1	0	0	1	0
2006-07-14	32	30	0.5	6.5	33	1	27.6	84	0.6	7	2006	Friday	Rainy	0	0	0	0	1	0	1	0
2006-07-15	25	26	0	6	26	1	27.1	82	4.7	7	2006	Saturday	Rainy	0	0	0	0	0	1	1	0
2006-07-16	26	26.5	0.5	7	43.5	1	27	86	1.06667	7	2006	Sunday	Rainy	0	0	0	0	0	0	1	0
2006-07-17	35	35.5	0	9.5	25.5	0.5	27.2	85	3.83333	7	2006	Monday	Rainy	1	0	0	0	0	0	1	0
2006-07-18	39	46	0.5	7	23	0.5	26.2	85	4.66667	7	2006	Tuesday	Rainy	0	1	0	0	0	0	1	0
2006-07-19	29	23	0.5	3	22	0.5	24.2	96	10.2	7	2006	Wednesday	Rainy	0	0	1	0	0	0	1	0
2006-07-20	32	23.5	1	5	33.5	1	24.7	94	4.43333	7	2006	Thursday	Rainy	0	0	0	1	0	0	1	0
2006-07-21	35	41.5	0.5	9	48.5	1	25.9	91	4.3	7	2006	Friday	Rainy	0	0	0	0	1	0	1	0
2006-07-22	23	45.5	1	9	42.5	0.5	26.7	86	0	7	2006	Saturday	Rainy	0	0	0	0	0	1	1	0
2006-07-23	33	32	0.5	5	44.5	0.5	28	81	3.5	7	2006	Sunday	Rainy	0	0	0	0	0	0	1	0
2006-07-24	30	27	0.5	7	39.5	0.5	28.2	81	22.0667	7	2006	Monday	Rainy	1	0	0	0	0	0	1	0
2006-07-25	30	20	0	6	37	0.5	26.7	87	24.0667	7	2006	Tuesday	Rainy	0	1	0	0	0	0	1	0
2006-07-26	32	21	0.5	8	26	0.5	25.1	93	17.6667	7	2006	Wednesday	Rainy	0	0	1	0	0	0	1	0
2006-07-27	24	23.5	0.5	10	22.5	0.5	24.1	97	17.3333	7	2006	Thursday	Rainy	0	0	0	1	0	0	1	0
2006-07-28	29	27	0.5	8	33	0.5	25.5	91	0.55	7	2006	Friday	Rainy	0	0	0	0	1	0	1	0
2006-07-29	33	23.5	0	5	28.5	0.5	26.8	83	0.133333	7	2006	Saturday	Rainy	0	0	0	0	0	1	1	0
2006-07-30	27	25.5	0.5	6.5	39.5	0.5	26.5	89	92.3333	7	2006	Sunday	Rainy	0	0	0	0	0	0	1	0
2006-07-31	18	15	0.5	8.5	19	0.5	23.9	98	42.6667	7	2006	Monday	Rainy	1	0	0	0	0	0	1	0
2006-08-01	30	24.5	0.5	8	26.5	0.5	25.1	91	16.0667	8	2006	Tuesday	Rainy	0	1	0	0	0	0	1	0
2006-08-02	27	24	0	9.5	25.5	0.5	25	94	3.93333	8	2006	Wednesday	Rainy	0	0	1	0	0	0	1	0
2006-08-03	37	34.5	1.5	9.5	32	0.5	25.7	91	1.4	8	2006	Thursday	Rainy	0	0	0	1	0	0	1	0
2006-08-04	33	32.5	1	9	31	0.5	27	82	0	8	2006	Friday	Rainy	0	0	0	0	1	0	1	0
2006-08-05	25	32.5	1	10	31	0.5	27.8	79	0	8	2006	Saturday	Rainy	0	0	0	0	0	1	1	0
2006-08-06	30	34	1.5	8.5	39.5	0.5	27.7	82	0	8	2006	Sunday	Rainy	0	0	0	0	0	0	1	0
2006-08-07	32	34	1	9	42.5	0.5	28.1	84	22.05	8	2006	Monday	Rainy	1	0	0	0	0	0	1	0
2006-08-08	38	34.5	1.5	9.5	40	0.5	26.3	93	10.1667	8	2006	Tuesday	Rainy	0	1	0	0	0	0	1	0
2006-08-09	25	24.5	1	7	30.5	0.5	26.4	89	17.1	8	2006	Wednesday	Rainy	0	0	1	0	0	0	1	0
2006-08-10	30	21	1.5	7	28.5	1	25.7	91	9.9	8	2006	Thursday	Rainy	0	0	0	1	0	0	1	0
2006-08-11	34	18.5	1	5	20.5	0.5	26.2	88	9.9	8	2006	Friday	Rainy	0	0	0	0	1	0	1	0
2006-08-12	33	17	1.5	4	43	0.5	26	91	9.43333	8	2006	Saturday	Rainy	0	0	0	0	0	1	1	0
2006-08-13	26	13	1	5	27	0.5	25.5	94	12.9	8	2006	Sunday	Rainy	0	0	0	0	0	0	1	0
2006-08-14	25	13	1	4	39.5	0.5	25.8	91	2.4	8	2006	Monday	Rainy	1	0	0	0	0	0	1	0
2006-08-15	36	20	1	6	48.5	0.5	27.5	86	1.8	8	2006	Tuesday	Rainy	0	1	0	0	0	0	1	0
2006-08-16	30	21	1	7	35.5	1	26.2	93	6.9	8	2006	Wednesday	Rainy	0	0	1	0	0	0	1	0
2006-08-17	26	32	1	8	43.5	1	26.8	89	3.6	8	2006	Thursday	Rainy	0	0	0	1	0	0	1	0
2006-08-18	27	21	1	9	47	0.5	27.2	90	25.9667	8	2006	Friday	Rainy	0	0	0	0	1	0	1	0
2006-08-19	23	25	1	9.5	27.5	0.5	26	93	1.6	8	2006	Saturday	Rainy	0	0	0	0	0	1	1	0
2006-08-20	31	17.5	0.5	8	17	0.5	25.7	89	22.6	8	2006	Sunday	Rainy	0	0	0	0	0	0	1	0
2006-08-21	28	28.5	0.5	9.5	22	1	25.4	91	4.13333	8	2006	Monday	Rainy	1	0	0	0	0	0	1	0
2006-08-22	24	24	0.5	7.5	25.5	1	25.2	94	6.33333	8	2006	Tuesday	Rainy	0	1	0	0	0	0	1	0
2006-08-23	35	34	0.5	8.5	25.5	0.5	26	90	0.35	8	2006	Wednesday	Rainy	0	0	1	0	0	0	1	0
2006-08-24	33	42	1	10.5	44	1	27	90	2.2	8	2006	Thursday	Rainy	0	0	0	1	0	0	1	0
2006-08-25	32	25	0.5	8	40	0.5	26.5	92	6.36667	8	2006	Friday	Rainy	0	0	0	0	1	0	1	0
2006-08-26	22	18.5	0.5	6.5	24.5	0.5	26.1	92	18.5	8	2006	Saturday	Rainy	0	0	0	0	0	1	1	0
2006-08-27	35	18	0.5	6.5	19.5	0.5	25.6	93	12.1333	8	2006	Sunday	Rainy	0	0	0	0	0	0	1	0
2006-08-28	31	27.5	0.5	9.5	29.5	1	24.7	96	6.73333	8	2006	Monday	Rainy	1	0	0	0	0	0	1	0
2006-08-29	30	30.5	0.5	8	38.5	1	26.3	90	18.9	8	2006	Tuesday	Rainy	0	1	0	0	0	0	1	0
2006-08-30	24	25	0.5	9	20.5	1	24.5	98	40.1333	8	2006	Wednesday	Rainy	0	0	1	0	0	0	1	0
2006-08-31	31	17	1.5	12.5	13	1	23	99	42.5667	8	2006	Thursday	Rainy	0	0	0	1	0	0	1	0
2006-09-01	34	19.5	0.5	10	16.5	1	24.7	92	11.8	9	2006	Friday	Rainy	0	0	0	0	1	0	1	0
2006-09-02	25	23.5	0.5	8.5	26	1	25.9	85	1.66667	9	2006	Saturday	Rainy	0	0	0	0	0	1	1	0
2006-09-03	24	25	0.5	8.5	34	1	27.2	84	0	9	2006	Sunday	Rainy	0	0	0	0	0	0	1	0
2006-09-04	28	27.5	1	8.5	35.5	1	28.7	79	0	9	2006	Monday	Rainy	1	0	0	0	0	0	1	0
2006-09-05	39	29.5	0.5	8.5	46	1	28.4	81	0	9	2006	Tuesday	Rainy	0	1	0	0	0	0	1	0
2006-09-06	22	30	1	8	37	0.5	28	82	2.33333	9	2006	Wednesday	Rainy	0	0	1	0	0	0	1	0
2006-09-07	30	28.5	0.5	8.5	23	1	28.5	82	0.333333	9	2006	Thursday	Rainy	0	0	0	1	0	0	1	0
2006-09-08	22	27	0.5	8	28.5	1	29.1	80	0	9	2006	Friday	Rainy	0	0	0	0	1	0	1	0
2006-09-09	33	28.5	0.5	8	27.5	1	28.2	83	30.0333	9	2006	Saturday	Rainy	0	0	0	0	0	1	1	0
2006-09-10	41	16.5	0.5	6	31	1	26.2	88	20.2667	9	2006	Sunday	Rainy	0	0	0	0	0	0	1	0
2006-09-11	26	24	0.5	5.5	29	1	26.2	88	10.3333	9	2006	Monday	Rainy	1	0	0	0	0	0	1	0
2006-09-12	28	20.5	0.5	10	35.5	0.5	27	90	16.6	9	2006	Tuesday	Rainy	0	1	0	0	0	0	1	0
2006-09-13	36	23.5	0.5	8	35	0.5	26.7	86	0.533333	9	2006	Wednesday	Rainy	0	0	1	0	0	0	1	0
2006-09-14	35	41.5	0.5	11	45.5	0.5	28.5	79	0	9	2006	Thursday	Rainy	0	0	0	1	0	0	1	0
2006-09-15	29	45	1.5	8	40	1	27.5	84	0	9	2006	Friday	Rainy	0	0	0	0	1	0	1	0
2006-09-16	34	32	2	9	40	1	25.9	88	0	9	2006	Saturday	Rainy	0	0	0	0	0	1	1	0
2006-09-17	38	21.5	2	6.5	30.5	1	26.9	83	11.3	9	2006	Sunday	Rainy	0	0	0	0	0	0	1	0
2006-09-18	31	23.5	1.5	6.5	31.5	0	26.6	85	32.6333	9	2006	Monday	Rainy	1	0	0	0	0	0	1	0
2006-09-19	19	21.5	1	8	24	1	25	91	33.6667	9	2006	Tuesday	Rainy	0	1	0	0	0	0	1	0
2006-09-20	37	16	1	6.5	19.5	0	24.7	93	19.0667	9	2006	Wednesday	Rainy	0	0	1	0	0	0	1	0
2006-09-21	31	18	1	6.5	22.5	1	24.4	93	32.1333	9	2006	Thursday	Rainy	0	0	0	1	0	0	1	0
2006-09-22	39	21	1	5.5	17	0	25.6	91	11.5667	9	2006	Friday	Rainy	0	0	0	0	1	0	1	0
2006-09-23	34	39	1	8.5	45.5	1	25.7	87	1.05	9	2006	Saturday	Rainy	0	0	0	0	0	1	1	0
2006-09-24	32	55	1.5	7	29.5	1	27.1	82	0	9	2006	Sunday	Rainy	0	0	0	0	0	0	1	0
2006-09-25	37	64	2	7.5	29	1	27.2	78	0.566667	9	2006	Monday	Rainy	1	0	0	0	0	0	1	0
2006-09-26	28	42.5	1.5	7.5	20	1	26.2	89	5.36667	9	2006	Tuesday	Rainy	0	1	0	0	0	0	1	0
2006-09-27	33	26.5	1	5.5	21.5	1	26.4	83	6.43333	9	2006	Wednesday	Rainy	0	0	1	0	0	0	1	0
2006-09-28	27	28	0.5	8	22.5	0.5	25	95	23.4667	9	2006	Thursday	Rainy	0	0	0	1	0	0	1	0
2006-09-29	24	27	0.5	8	31.5	0.5	25.7	92	2	9	2006	Friday	Rainy	0	0	0	0	1	0	1	0
2006-09-30	40	28.5	0.5	6	23	0.5	27.8	83	0	9	2006	Saturday	Rainy	0	0	0	0	0	1	1	0
2006-10-01	41	49	0.5	7	32	0.5	27.6	80	0	10	2006	Sunday	Rainy	0	0	0	0	0	0	1	0
2006-10-02	34	56	0.5	6.5	31.5	0.5	28.2	77	2.26667	10	2006	Monday	Rainy	1	0	0	0	0	0	1	0
2006-10-03	43	30	0.5	5.5	22	0.5	25.3	89	7.96667	10	2006	Tuesday	Rainy	0	1	0	0	0	0	1	0
2006-10-04	23	24	0.5	7	20.5	0.5	24.5	96	11.2333	10	2006	Wednesday	Rainy	0	0	1	0	0	0	1	0
2006-10-05	33	26	1	7	20.5	0.5	26.1	90	3.2	10	2006	Thursday	Rainy	0	0	0	1	0	0	1	0
2006-10-06	31	26.5	1	5	20	0.5	26.1	90	7.4	10	2006	Friday	Rainy	0	0	0	0	1	0	1	0
2006-10-07	33	17	0.5	4.5	17	0.5	25.8	91	10.3	10	2006	Saturday	Rainy	0	0	0	0	0	1	1	0
2006-10-08	33	19.5	0.5	5.5	19	0.5	25.7	90	60.3333	10	2006	Sunday	Rainy	0	0	0	0	0	0	1	0
2006-10-09	39	23	0.5	6.5	22.5	0.5	24.9	92	16.3	10	2006	Monday	Rainy	1	0	0	0	0	0	1	0
2006-10-10	26	38	0.5	6	27	0.5	25.9	85	4.06667	10	2006	Tuesday	Rainy	0	1	0	0	0	0	1	0
2006-10-11	31	31	1	6.5	26	0.5	25.3	88	3.96667	10	2006	Wednesday	Rainy	0	0	1	0	0	0	1	0
2006-10-12	34	35	0.5	7.5	36.5	0.5	25.4	90	5.33333	10	2006	Thursday	Rainy	0	0	0	1	0	0	1	0
2006-10-13	28	41.5	0.5	6.5	37.5	0.5	26.2	86	0	10	2006	Friday	Rainy	0	0	0	0	1	0	1	0
2006-10-14	29	48	0.5	8.5	50	0.5	26.2	85	0	10	2006	Saturday	Rainy	0	0	0	0	0	1	1	0
2006-10-15	26	48.5	0.5	9	44	0.5	25.8	83	0.766667	10	2006	Sunday	Winter	0	0	0	0	0	0	0	0
2006-10-16	28	48.5	0.5	9.5	59	0.5	26.2	81	0	10	2006	Monday	Winter	1	0	0	0	0	0	0	0
2006-10-17	31	48	0.5	9.5	39	0.5	26.3	84	1	10	2006	Tuesday	Winter	0	1	0	0	0	0	0	0
2006-10-18	33	39.5	1	7.5	52.5	0.5	26.7	82	1	10	2006	Wednesday	Winter	0	0	1	0	0	0	0	0
2006-10-19	20	39.5	0.5	9	51	0.5	26.6	83	21.4667	10	2006	Thursday	Winter	0	0	0	1	0	0	0	0
2006-10-20	38	39.5	1	9	32.5	0.5	26.4	82	0	10	2006	Friday	Winter	0	0	0	0	1	0	0	0
2006-10-21	36	37.5	0.5	7.5	49	0.5	26	83	0	10	2006	Saturday	Winter	0	0	0	0	0	1	0	0
2006-10-22	38	34	0.5	8	29.5	0.5	26.1	82	0	10	2006	Sunday	Winter	0	0	0	0	0	0	0	0
2006-10-23	20	38.5	1	7.5	22	0.5	24.8	87	0	10	2006	Monday	Winter	1	0	0	0	0	0	0	0
2006-10-24	45	38.5	0.5	7.5	25	0.5	24.4	85	0	10	2006	Tuesday	Winter	0	1	0	0	0	0	0	0
2006-10-25	31	38	0.5	7.5	30.5	0.5	25.4	83	1.7	10	2006	Wednesday	Winter	0	0	1	0	0	0	0	0
2006-10-26	31	38.5	0.5	7.5	27.5	0.5	25.8	81	0	10	2006	Thursday	Winter	0	0	0	1	0	0	0	0
2006-10-27	24	47	0.5	9	29	0.5	26.2	80	0	10	2006	Friday	Winter	0	0	0	0	1	0	0	0
2006-10-28	31	51.5	0.5	8.5	30.5	0.5	26	82	0	10	2006	Saturday	Winter	0	0	0	0	0	1	0	0
2006-10-29	30	50.5	0.5	8.5	28	0.5	25.3	81	0	10	2006	Sunday	Winter	0	0	0	0	0	0	0	0
2006-10-30	28	57.5	0.5	9.5	28.5	1	25.4	81	0	10	2006	Monday	Winter	1	0	0	0	0	0	0	0
2006-10-31	40	54	0.5	9	27.5	1	25.1	82	0	10	2006	Tuesday	Winter	0	1	0	0	0	0	0	0
2006-11-01	33	57	1	8	26.5	1	25.3	77	0	11	2006	Wednesday	Winter	0	0	1	0	0	0	0	0
2006-11-02	23	71.5	0.5	9.5	27.5	1	24.8	79	0	11	2006	Thursday	Winter	0	0	0	1	0	0	0	0
2006-11-03	24	57	1.5	10	28.5	1	24	78	0	11	2006	Friday	Winter	0	0	0	0	1	0	0	0
2006-11-04	35	57.5	1.5	11	30	1	24	78	0	11	2006	Saturday	Winter	0	0	0	0	0	1	0	0
2006-11-05	43	73.5	1.5	13.5	66.5	1	23.9	81	0	11	2006	Sunday	Winter	0	0	0	0	0	0	0	0
2006-11-06	28	66.5	1.5	12.5	34	1	25.7	80	0.333333	11	2006	Monday	Winter	1	0	0	0	0	0	0	0
2006-11-07	29	52	1	11.5	26	1	24.3	84	0	11	2006	Tuesday	Winter	0	1	0	0	0	0	0	0
2006-11-08	35	83	0.5	12.5	33	1	23.7	80	0	11	2006	Wednesday	Winter	0	0	1	0	0	0	0	0
2006-11-09	25	76	1	13	35.5	1	24.5	79	0	11	2006	Thursday	Winter	0	0	0	1	0	0	0	0
2006-11-10	37	58	0.5	14	30	1	25.2	77	0	11	2006	Friday	Winter	0	0	0	0	1	0	0	0
2006-11-11	40	43.5	0.5	9	27	0.5	25.4	79	0	11	2006	Saturday	Winter	0	0	0	0	0	1	0	0
2006-11-12	44	51.5	0.5	11.5	38	1	25.6	80	0	11	2006	Sunday	Winter	0	0	0	0	0	0	0	0
2006-11-13	28	66.5	0.5	15	39.5	1	24.9	82	0	11	2006	Monday	Winter	1	0	0	0	0	0	0	0
2006-11-14	34	74	1	17	42	1	25.5	81	3.8	11	2006	Tuesday	Winter	0	1	0	0	0	0	0	0
2006-11-15	30	75.5	0.5	14	49	1	24.8	82	0	11	2006	Wednesday	Winter	0	0	1	0	0	0	0	0
2006-11-16	23	85	1	18	71.5	1.5	24.2	80	0	11	2006	Thursday	Winter	0	0	0	1	0	0	0	0
2006-11-17	45	69.5	0.5	16.5	42	1	24.7	78	0	11	2006	Friday	Winter	0	0	0	0	1	0	0	0
2006-11-18	35	59	1.5	17	65.5	0.5	24.2	77	0	11	2006	Saturday	Winter	0	0	0	0	0	1	0	0
2006-11-19	31	56	0.5	15	60.5	1	24.4	79	0	11	2006	Sunday	Winter	0	0	0	0	0	0	0	0
2006-11-20	29	51.5	0.5	14	45.5	1	25.5	78	0	11	2006	Monday	Winter	1	0	0	0	0	0	0	0
2006-11-21	23	41.5	0.5	14	38	1	24.9	74	0	11	2006	Tuesday	Winter	0	1	0	0	0	0	0	0
2006-11-22	41	39	0.5	14.5	37.5	0.5	23	73	0	11	2006	Wednesday	Winter	0	0	1	0	0	0	0	0
2006-11-23	24	43	0.5	14	41.5	0.5	21.6	71	0	11	2006	Thursday	Winter	0	0	0	1	0	0	0	0
2006-11-24	23	42.5	0.5	14	42	0.5	20.7	75	0	11	2006	Friday	Winter	0	0	0	0	1	0	0	0
2006-11-25	29	41.5	0.5	12.5	48.5	0.5	21.3	75	0	11	2006	Saturday	Winter	0	0	0	0	0	1	0	0
2006-11-26	46	39	0.5	11.5	27	0.5	22.7	75	0	11	2006	Sunday	Winter	0	0	0	0	0	0	0	0
2006-11-27	32	37	0.5	10.5	23	0.5	23	74	0	11	2006	Monday	Winter	1	0	0	0	0	0	0	0
2006-11-28	39	49.5	1	13	47	0.5	22.7	76	0	11	2006	Tuesday	Winter	0	1	0	0	0	0	0	0
2006-11-29	35	52	1	12.5	50	0.5	22.9	78	0	11	2006	Wednesday	Winter	0	0	1	0	0	0	0	0
2006-11-30	26	45.5	1	13	41.5	0.5	22.6	77	0	11	2006	Thursday	Winter	0	0	0	1	0	0	0	0
2006-12-01	31	47	1	14	55	0.5	22.1	75	0	12	2006	Friday	Winter	0	0	0	0	1	0	0	0
2006-12-02	32	56	0.5	15	66	1	22.2	76	0	12	2006	Saturday	Winter	0	0	0	0	0	1	0	0
2006-12-03	31	61.5	1	13	49.5	1	24.2	81	0	12	2006	Sunday	Winter	0	0	0	0	0	0	0	0
2006-12-04	36	64.5	0.5	15	44	1	25.1	81	0	12	2006	Monday	Winter	1	0	0	0	0	0	0	0
2006-12-05	33	53.5	0.5	14.5	50	1	24	79	0	12	2006	Tuesday	Winter	0	1	0	0	0	0	0	0
2006-12-06	34	54	0.5	14	51	1	23.2	79	0	12	2006	Wednesday	Winter	0	0	1	0	0	0	0	0
2006-12-07	35	53	0.5	15	54.5	1	23.8	80	0	12	2006	Thursday	Winter	0	0	0	1	0	0	0	0
2006-12-08	42	53	0.5	14	43.5	1	24.4	82	0	12	2006	Friday	Winter	0	0	0	0	1	0	0	0
2006-12-09	26	60	1	15	71	1	25.7	80	0	12	2006	Saturday	Winter	0	0	0	0	0	1	0	0
2006-12-10	44	55.5	0.5	12	33.5	1	25.9	79	0	12	2006	Sunday	Winter	0	0	0	0	0	0	0	0
2006-12-11	35	57	1	13	38	1	25.6	75	0	12	2006	Monday	Winter	1	0	0	0	0	0	0	0
2006-12-12	35	64	1	14	40	1	24.4	76	0	12	2006	Tuesday	Winter	0	1	0	0	0	0	0	0
2006-12-13	32	58.5	1	12.5	40.5	1	23.3	77	0	12	2006	Wednesday	Winter	0	0	1	0	0	0	0	0
2006-12-14	21	66.5	1	11.5	41.5	1	23.9	77	0	12	2006	Thursday	Winter	0	0	0	1	0	0	0	0
2006-12-15	38	74.5	1	11.5	39.5	1	23.7	77	0	12	2006	Friday	Winter	0	0	0	0	1	0	0	0
2006-12-16	30	54	0.5	7.5	25.5	1	23.9	72	0	12	2006	Saturday	Winter	0	0	0	0	0	1	0	0
2006-12-17	29	43.5	0.5	4	22.5	0.5	22.8	60	0	12	2006	Sunday	Winter	0	0	0	0	0	0	0	0
2006-12-18	33	66	1	7.5	30	1	21.3	64	0	12	2006	Monday	Winter	1	0	0	0	0	0	0	0
2006-12-19	34	60.5	1	5.5	28	1	21.3	66	0	12	2006	Tuesday	Winter	0	1	0	0	0	0	0	0
2006-12-20	28	59	1	6.5	30.5	1	21.5	57	0	12	2006	Wednesday	Winter	0	0	1	0	0	0	0	0
2006-12-21	31	61.5	1	9.5	32	1	20.4	51	0	12	2006	Thursday	Winter	0	0	0	1	0	0	0	0
2006-12-22	31	76	1.5	13.5	28.5	1	17.1	69	0	12	2006	Friday	Winter	0	0	0	0	1	0	0	0
2006-12-23	58	82	1.5	13.5	31	1	17.5	68	0	12	2006	Saturday	Winter	0	0	0	0	0	1	0	0
2006-12-24	40	76.5	1	11.5	32	1	17.7	74	0	12	2006	Sunday	Winter	0	0	0	0	0	0	0	0
2006-12-25	52	79.5	1	16	29.5	1	17.9	72	0	12	2006	Monday	Winter	1	0	0	0	0	0	0	0
2006-12-26	34	77	0	17	43	1	17.8	72	0	12	2006	Tuesday	Winter	0	1	0	0	0	0	0	0
2006-12-27	35	74.5	1	17.5	43	1	18.3	74	0	12	2006	Wednesday	Winter	0	0	1	0	0	0	0	0
2006-12-28	39	65	0.5	16.5	35	1	19	75	0	12	2006	Thursday	Winter	0	0	0	1	0	0	0	0
2006-12-29	24	60	1	16	38.5	1	19.6	75	0	12	2006	Friday	Winter	0	0	0	0	1	0	0	0
2006-12-30	7	48	0.5	16.5	43.5	1	20.3	73	0	12	2006	Saturday	Winter	0	0	0	0	0	1	0	0
2006-12-31	4	55	0.5	16	40.5	1	20.9	72	0	12	2006	Sunday	Winter	0	0	0	0	0	0	0	0
2007-01-01	40	64	1	16	45.5	1	18.3333	70.6667	0	1	2007	Monday	Winter	1	0	0	0	0	0	0	0
2007-01-02	41	49.5	0.5	15	42	1	18.1	73.3333	0	1	2007	Tuesday	Winter	0	1	0	0	0	0	0	0
2007-01-03	47	54.5	0.5	17.5	45	1	17.9667	71.3333	0	1	2007	Wednesday	Winter	0	0	1	0	0	0	0	0
2007-01-04	37	56.5	1	16	45.5	1	18.4667	71.3333	0	1	2007	Thursday	Winter	0	0	0	1	0	0	0	0
2007-01-05	40	63	1	16.5	45.5	1	19.2667	70.6667	0	1	2007	Friday	Winter	0	0	0	0	1	0	0	0
2007-01-06	39	50	0.5	16.5	35	1	19.7	73	0	1	2007	Saturday	Winter	0	0	0	0	0	1	0	0
2007-01-07	50	60.5	1	17.5	35.5	1	19.1	76.3333	0	1	2007	Sunday	Winter	0	0	0	0	0	0	0	0
2007-01-08	40	61.5	1	16.5	44.5	1	19.1667	76.6667	0	1	2007	Monday	Winter	1	0	0	0	0	0	0	0
2007-01-09	38	54	0.5	15	38	1	17.9667	75.3333	0	1	2007	Tuesday	Winter	0	1	0	0	0	0	0	0
2007-01-10	35	68	1.5	17	60	1	18.9333	74.3333	0	1	2007	Wednesday	Winter	0	0	1	0	0	0	0	0
2007-01-11	31	74	1	18.5	58	1	19.6333	71.3333	0	1	2007	Thursday	Winter	0	0	0	1	0	0	0	0
2007-01-12	48	79	1	19	63	1	19.6	73.3333	0	1	2007	Friday	Winter	0	0	0	0	1	0	0	0
2007-01-13	44	77.5	0.5	18.5	69	1	20.1667	71.3333	0	1	2007	Saturday	Winter	0	0	0	0	0	1	0	0
2007-01-14	49	76.5	1	16	51.5	1	20.4667	71.3333	0	1	2007	Sunday	Winter	0	0	0	0	0	0	0	0
2007-01-15	46	66.5	1.5	17	41.5	1	20.4667	64.3333	0	1	2007	Monday	Winter	1	0	0	0	0	0	0	0
2007-01-16	44	51	0.5	15.5	41	1	20.1	59.3333	0	1	2007	Tuesday	Winter	0	1	0	0	0	0	0	0
2007-01-17	38	57.5	2.5	19.5	60	1	20.4	57	0	1	2007	Wednesday	Winter	0	0	1	0	0	0	0	0
2007-01-18	32	54	1	22.5	38	1	20.1667	51.6667	0	1	2007	Thursday	Winter	0	0	0	1	0	0	0	0
2007-01-19	29	59	1.5	22	70.5	1	19.4333	52	0	1	2007	Friday	Winter	0	0	0	0	1	0	0	0
2007-01-20	28	55.5	1	22.5	65	1	19.6	47.6667	0	1	2007	Saturday	Winter	0	0	0	0	0	1	0	0
2007-01-21	30	48	0	15		1	18.9333	54.6667	0	1	2007	Sunday	Winter	0	0	0	0	0	0	0	0
2007-01-22	41	63	0	16		1	18.9333	52.3333	0	1	2007	Monday	Winter	1	0	0	0	0	0	0	0
2007-01-23	45	72	0	16		1	20.1667	57.6667	0	1	2007	Tuesday	Winter	0	1	0	0	0	0	0	0
2007-01-24	35	83	0	12	62	1	21.6	70.6667	0	1	2007	Wednesday	Winter	0	0	1	0	0	0	0	0
2007-01-25	48	85.5	1	23	56	1	22.2	77	0	1	2007	Thursday	Winter	0	0	0	1	0	0	0	0
2007-01-26	43	71	0	13	54	1	22.2667	68	0	1	2007	Friday	Winter	0	0	0	0	1	0	0	0
2007-01-27	37	75	1	14	59	1	21.7	71.6667	0	1	2007	Saturday	Winter	0	0	0	0	0	1	0	0
2007-01-28	34	71	0	12.5	32	1	17.3667	83.3333	0.433333	1	2007	Sunday	Winter	0	0	0	0	0	0	0	0
2007-01-29	34	68	1	12	47	1	17.8	63.6667	0	1	2007	Monday	Winter	1	0	0	0	0	0	0	0
2007-01-30	41	101	1	21	52	1	17.5667	66.3333	0	1	2007	Tuesday	Winter	0	1	0	0	0	0	0	0
2007-01-31	35	136	1	25.5	66	0.5	17.7667	64.3333	0	1	2007	Wednesday	Winter	0	0	1	0	0	0	0	0
2007-02-01	42	137	1	26.5	65.5	1	17.3333	63.3333	0	2	2007	Thursday	Winter	0	0	0	1	0	0	0	0
2007-02-02	43	110.5	1.5	20	50.5	1	16.5	63	0.866667	2	2007	Friday	Winter	0	0	0	0	1	0	0	0
2007-02-03	33	111	1.5	18	63	1	16.6333	67.6667	0	2	2007	Saturday	Winter	0	0	0	0	0	1	0	0
2007-02-04	46	147	2	24	77.5	1	17.1667	67	0	2	2007	Sunday	Winter	0	0	0	0	0	0	0	0
2007-02-05	46	144	1.5	27	74	1	18.3333	59.6667	0	2	2007	Monday	Winter	1	0	0	0	0	0	0	0
2007-02-06	49	135	1.5	28.5	70	1	18.9667	57.3333	0	2	2007	Tuesday	Winter	0	1	0	0	0	0	0	0
2007-02-07	39	132.5	1	28.5	64.5	1	19.1667	61.3333	0	2	2007	Wednesday	Winter	0	0	1	0	0	0	0	0
2007-02-08	40	131	1	29	56	1	19.9	58.6667	0	2	2007	Thursday	Winter	0	0	0	1	0	0	0	0
2007-02-09	45	97.5	0.5	24	54.5	1	21.1333	58	0	2	2007	Friday	Winter	0	0	0	0	1	0	0	0
2007-02-10	42	67	0.5	21	48.5	1	21.5667	55.3333	0	2	2007	Saturday	Winter	0	0	0	0	0	1	0	0
2007-02-11	53	84	0.5	23.5	65.5	1	22.2333	57.6667	0	2	2007	Sunday	Winter	0	0	0	0	0	0	0	0
2007-02-12	39	77	0.5	24.5	64.5	1	22.3	55	0	2	2007	Monday	Winter	1	0	0	0	0	0	0	0
2007-02-13	39	60	0.5	23	60	1	22.9667	51	0	2	2007	Tuesday	Winter	0	1	0	0	0	0	0	0
2007-02-14	44	43.5	0.5	23	55	1	22.6667	51.3333	0	2	2007	Wednesday	Winter	0	0	1	0	0	0	0	0
2007-02-15	44	51.5	1	19	46	1	22.3333	56.3333	0.0333333	2	2007	Thursday	Summer	0	0	0	1	0	0	0	1
2007-02-16	33	52.5	0.5	16	38	1	21.8333	55.6667	0	2	2007	Friday	Summer	0	0	0	0	1	0	0	1
2007-02-17	35	60	0.5	14	49.5	0.5	21.9667	54	0	2	2007	Saturday	Summer	0	0	0	0	0	1	0	1
2007-02-18	33	62	0.5	14.5	47.5	0.5	21.6	47	0	2	2007	Sunday	Summer	0	0	0	0	0	0	0	1
2007-02-19	45	80.5	0.5	19	62	1	22	49.3333	0	2	2007	Monday	Summer	1	0	0	0	0	0	0	1
2007-02-20	35	94	0.5	22.5	75	1	22	49	0	2	2007	Tuesday	Summer	0	1	0	0	0	0	0	1
2007-02-21	30	97	0.5	23	77.5	1	22.1333	43.3333	0	2	2007	Wednesday	Summer	0	0	1	0	0	0	0	1
2007-02-22	49	98.5	1	23	63	1	22.4333	41	0	2	2007	Thursday	Summer	0	0	0	1	0	0	0	1
2007-02-23	46	96.5	0.5	25	66	1	22.7667	43	0	2	2007	Friday	Summer	0	0	0	0	1	0	0	1
2007-02-24	43	111	1	25	59	1	24.5667	50.6667	0	2	2007	Saturday	Summer	0	0	0	0	0	1	0	1
2007-02-25	26	91.5	1	23	63	1	25.5	53.3333	0	2	2007	Sunday	Summer	0	0	0	0	0	0	0	1
2007-02-26	48	69.5	1	18	39.5	0.5	26.0667	55.6667	0	2	2007	Monday	Summer	1	0	0	0	0	0	0	1
2007-02-27	43	69	1.5	18	51	0.5	25.4667	50.3333	0	2	2007	Tuesday	Summer	0	1	0	0	0	0	0	1
2007-02-28	37	109.5	1.5	28	76	1	23.9	45.3333	0	2	2007	Wednesday	Summer	0	0	1	0	0	0	0	1
2007-03-01	33	173	2	33	98.5	1.5	23.3	45.3333	0	3	2007	Thursday	Summer	0	0	0	1	0	0	0	1
2007-03-02	31	183.5	2.5	33	98.5	1.5	23.6	47	0	3	2007	Friday	Summer	0	0	0	0	1	0	0	1
2007-03-03	29	155	1.5	34.5	90.5	1	23.0333	50.3333	0	3	2007	Saturday	Summer	0	0	0	0	0	1	0	1
2007-03-04	37	184	2.5	37.5	102	2	23.3667	47.6667	0	3	2007	Sunday	Summer	0	0	0	0	0	0	0	1
2007-03-05	36	240	1.5	37.5	95	2.5	23.6	49.6667	0	3	2007	Monday	Summer	1	0	0	0	0	0	0	1
2007-03-06	33	216	0.5	36	88	2.5	23.5667	50	0	3	2007	Tuesday	Summer	0	1	0	0	0	0	0	1
2007-03-07	24	143	0	23	70	1.5	24.2667	42	0	3	2007	Wednesday	Summer	0	0	1	0	0	0	0	1
2007-03-08	36	150	0.5	22.5	74.5	1.5	23.3667	39.6667	0	3	2007	Thursday	Summer	0	0	0	1	0	0	0	1
2007-03-09	29	129	1.5	23	72.5	1.5	23.5	42	0	3	2007	Friday	Summer	0	0	0	0	1	0	0	1
2007-03-10	34	192.5	3	32.5	110.5	2.5	22.5667	42.3333	0	3	2007	Saturday	Summer	0	0	0	0	0	1	0	1
2007-03-11	32	234	2	36.5	104	2.5	22.6333	44.6667	0	3	2007	Sunday	Summer	0	0	0	0	0	0	0	1
2007-03-12	33	278	2	40	99	3	23.5333	48.3333	0	3	2007	Monday	Summer	1	0	0	0	0	0	0	1
2007-03-13	45	356.5	2	43.5	71.5	4	23.7	48	0	3	2007	Tuesday	Summer	0	1	0	0	0	0	0	1
2007-03-14	34	273.5	1.5	37.5	122.5	2.5	24.8333	51.6667	0	3	2007	Wednesday	Summer	0	0	1	0	0	0	0	1
2007-03-15	44	189.5	1	31.5	96.5	2.5	25.9	55.3333	0	3	2007	Thursday	Summer	0	0	0	1	0	0	0	1
2007-03-16	32	166.5	0.5	32	98	2.5	25.7333	64.6667	0	3	2007	Friday	Summer	0	0	0	0	1	0	0	1
2007-03-17	29	189.5	1	32.5	85.5	2.5	25.4	50.3333	0	3	2007	Saturday	Summer	0	0	0	0	0	1	0	1
2007-03-18	37	189	0.5	28.5	99.5	2.5	24.8667	43.6667	0	3	2007	Sunday	Summer	0	0	0	0	0	0	0	1
2007-03-19	48	174.5	0.5	26.5	74.5	2	25.3667	49	0	3	2007	Monday	Summer	1	0	0	0	0	0	0	1
2007-03-20	40	111	0	13	71.5	1.5	26.5667	57.3333	4.43333	3	2007	Tuesday	Summer	0	1	0	0	0	0	0	1
2007-03-21	26	60.5	0	9	68	1.5	24.1667	61	0.8	3	2007	Wednesday	Summer	0	0	1	0	0	0	0	1
2007-03-22	40	85	0	17	81	1.5	24.3667	67	3.63333	3	2007	Thursday	Summer	0	0	0	1	0	0	0	1
2007-03-23	29	84.5	0.5	21	70.5	1	25.7	50.6667	0	3	2007	Friday	Summer	0	0	0	0	1	0	0	1
2007-03-24	24	132	0.5	25	92	1	25.7	48.6667	0	3	2007	Saturday	Summer	0	0	0	0	0	1	0	1
2007-03-25	36	162	0.5	25	96.5	1	26.5667	53.3333	0	3	2007	Sunday	Summer	0	0	0	0	0	0	0	1
2007-03-26	40	139	0.5	23	86.5	1	27.2667	52.3333	0	3	2007	Monday	Summer	1	0	0	0	0	0	0	1
2007-03-27	38	123	1	27	97	1	27.3	53.3333	0	3	2007	Tuesday	Summer	0	1	0	0	0	0	0	1
2007-03-28	43	124	0.5	23	110	1	27.1333	49.3333	0	3	2007	Wednesday	Summer	0	0	1	0	0	0	0	1
2007-03-29	36	122	0.5	21.5	92.5	1	28.1667	46.6667	0	3	2007	Thursday	Summer	0	0	0	1	0	0	0	1
2007-03-30	43	90.5	0	14	78.5	1	28.1667	51.3333	2.2	3	2007	Friday	Summer	0	0	0	0	1	0	0	1
2007-03-31	23	92	0.5	20.5	90.5	1	28.2333	55.6667	0	3	2007	Saturday	Summer	0	0	0	0	0	1	0	1
2007-04-01	53	98.5	0	17	65	1	29.4	47.3333	0	4	2007	Sunday	Summer	0	0	0	0	0	0	0	1
2007-04-02	36	92	0	15.5	66	1	28.9	39	0	4	2007	Monday	Summer	1	0	0	0	0	0	0	1
2007-04-03	37	149	1.5	18	93.5	1	27.1667	44.6667	0	4	2007	Tuesday	Summer	0	1	0	0	0	0	0	1
2007-04-04	31	125.5	0.5	13	80.5	1	27.2333	43.6667	0	4	2007	Wednesday	Summer	0	0	1	0	0	0	0	1
2007-04-05	37	98.5	0.5	18	63.5	1	27.8333	46.6667	0	4	2007	Thursday	Summer	0	0	0	1	0	0	0	1
2007-04-06	40	110	0.5	17	73.5	1	27.4667	49.6667	0	4	2007	Friday	Summer	0	0	0	0	1	0	0	1
2007-04-07	37	103	0	16.5	81.5	1	27.7333	47.3333	0	4	2007	Saturday	Summer	0	0	0	0	0	1	0	1
2007-04-08	41	117.5	0.5	15	80	0.5	27.3333	49.3333	0	4	2007	Sunday	Summer	0	0	0	0	0	0	0	1
2007-04-09	37	82	0	12.5	71	0.5	27.9	52	0	4	2007	Monday	Summer	1	0	0	0	0	0	0	1
2007-04-10	30	93.5	0	20	73.5	1	27.4667	51	0	4	2007	Tuesday	Summer	0	1	0	0	0	0	0	1
2007-04-11	33	94	0	15	76	1	24.3333	67.6667	2.73333	4	2007	Wednesday	Summer	0	0	1	0	0	0	0	1
2007-04-12	31	52.5	0	12	74	1	24.4333	72.6667	4.15	4	2007	Thursday	Summer	0	0	0	1	0	0	0	1
2007-04-13	32	52.5	0	14.5	58.5	1	24.4	76	10.9333	4	2007	Friday	Summer	0	0	0	0	1	0	0	1
2007-04-14	24	56.5	0	14	57.5	1	25.3667	66	0.0333333	4	2007	Saturday	Summer	0	0	0	0	0	1	0	1
2007-04-15	41	61	0.5	13.5	73	1	25.1667	67.6667	3.15	4	2007	Sunday	Summer	0	0	0	0	0	0	0	1
2007-04-16	25	48.5	0	15	78	1	26.4667	58	0	4	2007	Monday	Summer	1	0	0	0	0	0	0	1
2007-04-17	38	41	0	12	61	1	27.3667	60	1.5	4	2007	Tuesday	Summer	0	1	0	0	0	0	0	1
2007-04-18	41	39	0	11	49	1	26.6	67.6667	14	4	2007	Wednesday	Summer	0	0	1	0	0	0	0	1
2007-04-19	33	38	0	11.5	71.5	1	25.6333	74	0.9	4	2007	Thursday	Summer	0	0	0	1	0	0	0	1
2007-04-20	31	36.5	0	13.5	64	1	27.7	62.6667	0	4	2007	Friday	Summer	0	0	0	0	1	0	0	1
2007-04-21	40	41.5	0	12.5	58	1	29.5667	49.6667	0	4	2007	Saturday	Summer	0	0	0	0	0	1	0	1
2007-04-22	35	45.5	0.5	10	47	0.5	30.1	49.6667	0	4	2007	Sunday	Summer	0	0	0	0	0	0	0	1
2007-04-23	30	55.5	0.5	16	61.5	1	29.6667	51.3333	0	4	2007	Monday	Summer	1	0	0	0	0	0	0	1
2007-04-24	41	65.5	0.5	17.5	76.5	1	29.7667	50.3333	0	4	2007	Tuesday	Summer	0	1	0	0	0	0	0	1
2007-04-25	51	67	0	12	75.5	1	29.4667	50.3333	8.33333	4	2007	Wednesday	Summer	0	0	1	0	0	0	0	1
2007-04-26	34	27	0	9	55	0.5	25.7667	70.3333	10.7	4	2007	Thursday	Summer	0	0	0	1	0	0	0	1
2007-04-27	30	26.5	0	7	62	0.5	25.6333	71.3333	23.5667	4	2007	Friday	Summer	0	0	0	0	1	0	0	1
2007-04-28	21	19	0	8	54	0.5	24.2667	78	0.1	4	2007	Saturday	Summer	0	0	0	0	0	1	0	1
2007-04-29	26	26	0	7.5	51	1	25.4333	74	2.6	4	2007	Sunday	Summer	0	0	0	0	0	0	0	1
2007-04-30	33	32	0	7	44.5	0.5	25.9333	66	0	4	2007	Monday	Summer	1	0	0	0	0	0	0	1
2007-05-01	28	32.5	0	6.5	57	0.5	26.6667	65	0	5	2007	Tuesday	Summer	0	1	0	0	0	0	0	1
2007-05-02	33	26	0	6	45.5	0.5	26	71.3333	2.6	5	2007	Wednesday	Summer	0	0	1	0	0	0	0	1
2007-05-03	29	21.5	0	7.5	37.5	0.5	23.8333	84.6667	4.5	5	2007	Thursday	Summer	0	0	0	1	0	0	0	1
2007-05-04	29	15.5	0	9	19	1	22.2	95.6667	58.6667	5	2007	Friday	Summer	0	0	0	0	1	0	0	1
2007-05-05	29			6	21.5	1	21.2	96	18.5667	5	2007	Saturday	Summer	0	0	0	0	0	1	0	1
2007-05-06	31	10		5.5	20.5	1	21.7667	94.3333	8.5	5	2007	Sunday	Summer	0	0	0	0	0	0	0	1
2007-05-07	29	22	0	6	30.5	0.5	23.0333	89.3333	10.8667	5	2007	Monday	Summer	1	0	0	0	0	0	0	1
2007-05-08	32	12	0	7	44	0.5	23.1	89.6667	9.06667	5	2007	Tuesday	Summer	0	1	0	0	0	0	0	1
2007-05-09	29	19	0	6	35	0.5	24.3667	87.6667	9.23333	5	2007	Wednesday	Summer	0	0	1	0	0	0	0	1
2007-05-10	35	29	0	6	49	1	24.7333	85.6667	20.3	5	2007	Thursday	Summer	0	0	0	1	0	0	0	1
2007-05-11	23	37.5	1.5	8.5	44	1	24.3	87.3333	8	5	2007	Friday	Summer	0	0	0	0	1	0	0	1
2007-05-12	33	25.5	1.5	7.5	34.5	1	23.5	90.6667	32.8	5	2007	Saturday	Summer	0	0	0	0	0	1	0	1
2007-05-13	32	21	1.5	10	26.5	0.5	22.5	94	58.2667	5	2007	Sunday	Summer	0	0	0	0	0	0	0	1
2007-05-14	31	17.5	1	11	27	0.5	23.2333	91.6667	17.8	5	2007	Monday	Summer	1	0	0	0	0	0	0	1
2007-05-15	31	28.5	0	11	26.5	1	23.4667	92	13.8	5	2007	Tuesday	Rainy	0	1	0	0	0	0	1	0
2007-05-16	29	34	0.5	9	37	1	24.4333	86	8.53333	5	2007	Wednesday	Rainy	0	0	1	0	0	0	1	0
2007-05-17	25	28.5	0.5	9	30.5	0.5	25	85.6667	2.93333	5	2007	Thursday	Rainy	0	0	0	1	0	0	1	0
2007-05-18	18	25	0.5	9	28	0.5	24.5667	86	4.5	5	2007	Friday	Rainy	0	0	0	0	1	0	1	0
2007-05-19	31	28.5	0.5	9	31.5	0.5	24.9333	83	9.5	5	2007	Saturday	Rainy	0	0	0	0	0	1	1	0
2007-05-20	38	27	0.5	9	25	0.5	23.8667	85.6667	2.7	5	2007	Sunday	Rainy	0	0	0	0	0	0	1	0
2007-05-21	28	25.5	0.5	4.5	21	0.5	24.3	81	0.3	5	2007	Monday	Rainy	1	0	0	0	0	0	1	0
2007-05-22	25	28.5	0.5	7	33.5	0.5	24.9333	79	0	5	2007	Tuesday	Rainy	0	1	0	0	0	0	1	0
2007-05-23	35	43.5	1	9.5	52	0.5	25.5333	75.6667	0.4	5	2007	Wednesday	Rainy	0	0	1	0	0	0	1	0
2007-05-24	34	45.5	1.5	12	36	0.5	26.6667	70.3333	0.166667	5	2007	Thursday	Rainy	0	0	0	1	0	0	1	0
2007-05-25	31	47.5	0.5	11	54	0.5	26.5	75.3333	1.3	5	2007	Friday	Rainy	0	0	0	0	1	0	1	0
2007-05-26	26	33.5	0.5	7	48	0.5	25.8	77.6667	0.2	5	2007	Saturday	Rainy	0	0	0	0	0	1	1	0
2007-05-27	34	44.5	1	7.5	40	0.5	27.2333	72	0	5	2007	Sunday	Rainy	0	0	0	0	0	0	1	0
2007-05-28	33	52	0	5	51	0	27	72	0	5	2007	Monday	Rainy	1	0	0	0	0	0	1	0
2007-05-29	35	47	0.5	8.5	60.5	0.5	26.6	75.3333	10.6	5	2007	Tuesday	Rainy	0	1	0	0	0	0	1	0
2007-05-30	28	31.5	1	11	57.5	1	25	84	0.633333	5	2007	Wednesday	Rainy	0	0	1	0	0	0	1	0
2007-05-31	30	29.5	0.5	10	61.5	1	25	83.6667	39.9	5	2007	Thursday	Rainy	0	0	0	1	0	0	1	0
2007-06-01	29	29	0.5	9	33.5	0.5	24.9	85	8.16667	6	2007	Friday	Rainy	0	0	0	0	1	0	1	0
2007-06-02	40	34.5	0.5	8.5	48.5	0.5	26.1667	79	0	6	2007	Saturday	Rainy	0	0	0	0	0	1	1	0
2007-06-03	16	35.5	1	8.5	47.5	0.5	25.8333	80	0.566667	6	2007	Sunday	Rainy	0	0	0	0	0	0	1	0
2007-06-04	38	26.5	1	8.5	34.5	0.5	25	83	13.8667	6	2007	Monday	Rainy	1	0	0	0	0	0	1	0
2007-06-05	29	24	0	5	40	0	24.8	85	12.1333	6	2007	Tuesday	Rainy	0	1	0	0	0	0	1	0
2007-06-06	28	22.5	0	6.5	34	0.5	24.8333	85.3333	10.3333	6	2007	Wednesday	Rainy	0	0	1	0	0	0	1	0
2007-06-07	21	24	0.5	7.5	32.5	0.5	26.3	75.6667	0	6	2007	Thursday	Rainy	0	0	0	1	0	0	1	0
2007-06-08	31	21.5	0.5	6	37	0.5	26.6667	73.3333	0.866667	6	2007	Friday	Rainy	0	0	0	0	1	0	1	0
2007-06-09	22	22	0.5	7	42.5	0.5	26.5667	75.6667	0	6	2007	Saturday	Rainy	0	0	0	0	0	1	1	0
2007-06-10	42	19.5	0.5	7.5	43	0.5	27.3	75.3333	0.933333	6	2007	Sunday	Rainy	0	0	0	0	0	0	1	0
2007-06-11	23	23.5	0.5	9.5	45	0.5	26.2333	78.3333	5	6	2007	Monday	Rainy	1	0	0	0	0	0	1	0
2007-06-12	37	23	0.5	8.5	38.5	0.5	25.2	82.3333	11.7	6	2007	Tuesday	Rainy	0	1	0	0	0	0	1	0
2007-06-13	26	22	0.5	8.5	25.5	0.5	24.5667	85.6667	1.3	6	2007	Wednesday	Rainy	0	0	1	0	0	0	1	0
2007-06-14	27	25	1	10	34	1	25.2667	83	6.1	6	2007	Thursday	Rainy	0	0	0	1	0	0	1	0
2007-06-15	34	24.5	0.5	8	42.5	0.5	26.1	79.6667	1.46667	6	2007	Friday	Rainy	0	0	0	0	1	0	1	0
2007-06-16	27	21.5	0.5	8	33.5	0.5	26.3333	78	6.36667	6	2007	Saturday	Rainy	0	0	0	0	0	1	1	0
2007-06-17	33	21.5	0.5	8	27	0.5	26.4333	80.3333	1.46667	6	2007	Sunday	Rainy	0	0	0	0	0	0	1	0
2007-06-18	33	32	0.5	11.5	45	1	25.9667	84	15.0333	6	2007	Monday	Rainy	1	0	0	0	0	0	1	0
2007-06-19	27	25.5	0.5	9	30	1	25.3333	86	4.6	6	2007	Tuesday	Rainy	0	1	0	0	0	0	1	0
2007-06-20	34	21	0.5	8	38	0.5	25.7667	82.3333	9.63333	6	2007	Wednesday	Rainy	0	0	1	0	0	0	1	0
2007-06-21	30	24	0.5	9	47	0.5	26.3	81.3333	0.166667	6	2007	Thursday	Rainy	0	0	0	1	0	0	1	0
2007-06-22	33	32.5	0	10	63.5	0.5	27.4	75.6667	0	6	2007	Friday	Rainy	0	0	0	0	1	0	1	0
[truncated: 3,480 more rows]
